# Supplementary material for: Digital Cell Atlas of Mouse Uterus: From Regenerative Stage to Maturational Stage
Source: Front Genet. 2022 May 20;13:847646. doi: 10.3389/fgene.2022.847646 (PMC9163836; doi:10.3389/fgene.2022.847646)
Supplement: Supplementary file 1 [file Table2.XLSX]

## Sheet: 0 s_stromal3_Nppc_high
Table S2: Representative genes of each cell cluster
	p_val	avg_logFC	pct.1	pct.2	p_val_adj
Ccl11	4.91266e-238	1.59639	0.771	0.14	7.66425e-234
Nppc	8.71773e-160	1.44123	0.616	0.13	1.36005e-155
Fbln2	6.31511e-222	1.36778	0.901	0.238	9.8522e-218
Hsd11b2	1.68846e-218	1.3666	0.863	0.208	2.63417e-214
Ccl7	4.23573e-157	1.32603	0.837	0.29	6.60816e-153
Ccl2	5.11481e-144	1.26526	0.712	0.193	7.97962e-140
P2ry14	2.7676e-183	1.25715	0.785	0.201	4.31773e-179
Ddit4l	6.75841e-170	1.25586	0.757	0.191	1.05438e-165
Aldh1a2	4.25057e-158	1.15815	0.828	0.264	6.63132e-154
Col6a4	6.12384e-183	1.15082	0.931	0.325	9.5538e-179
Ackr3	1.51943e-142	1.14612	0.643	0.154	2.37046e-138
Errfi1	4.75261e-138	1.12783	0.774	0.25	7.41455e-134
Tnfaip6	9.902e-141	1.1235	0.657	0.163	1.54481e-136
Ogn	1.60833e-157	1.06903	0.888	0.296	2.50915e-153
Col6a3	1.17784e-148	1.05775	0.931	0.382	1.83756e-144
Ramp3	4.5835e-147	1.05724	0.81	0.258	7.15072e-143
A2m	2.02811e-124	1.0507	0.488	0.091	3.16405e-120
Cd164	4.14737e-145	1.04709	0.86	0.319	6.47031e-141
Fosb	1.73928e-145	1.03032	0.909	0.368	2.71346e-141
Col6a2	1.12576e-172	1.02132	0.995	0.543	1.75629e-168
Cyr61	8.0172e-133	1.00387	0.902	0.375	1.25076e-128
Col6a1	9.90879e-165	0.997033	0.995	0.499	1.54587e-160
Cd63-ps	1.11341e-133	0.974611	0.845	0.293	1.73704e-129
Mmp19	1.77758e-95	0.972424	0.503	0.13	2.77321e-91
Spon1	1.76109e-125	0.972049	0.684	0.188	2.74748e-121
Klf4	1.77611e-111	0.970915	0.782	0.301	2.7709e-107
Htra1	1.63291e-131	0.968027	0.876	0.339	2.54751e-127
Sptssa	4.952e-94	0.967783	0.572	0.172	7.72562e-90
Gja1	6.53244e-102	0.958492	0.544	0.143	1.01913e-97
Gadd45g	9.53297e-140	0.951623	0.979	0.583	1.48724e-135
Sdk1	5.8842e-103	0.937564	0.384	0.068	9.17994e-99
Serpine1	2.24122e-95	0.935379	0.517	0.138	3.49652e-91
Anxa3	2.85672e-94	0.926889	0.639	0.219	4.45677e-90
Col5a1	4.23549e-111	0.919894	0.68	0.205	6.60779e-107
Ngfr	2.0609e-100	0.903492	0.561	0.155	3.21522e-96
Crispld2	8.56825e-109	0.902888	0.798	0.288	1.33673e-104
Sgk1	2.42122e-88	0.885627	0.719	0.279	3.77735e-84
Adm	1.36548e-60	0.876695	0.485	0.172	2.13028e-56
Rasd1	4.62917e-76	0.87072	0.41	0.105	7.22197e-72
Col1a1	1.08568e-131	0.867356	0.991	0.618	1.69376e-127
Atp8a1	7.50509e-89	0.847569	0.417	0.091	1.17087e-84
Fbn1	9.69742e-99	0.837054	0.577	0.16	1.51289e-94
Mfap5	2.69988e-102	0.832352	0.867	0.405	4.21208e-98
Cxcl10	1.18454e-77	0.828414	0.577	0.194	1.84801e-73
Gm8797	1.05907e-101	0.822456	0.844	0.362	1.65225e-97
Tnfrsf12a	7.15423e-72	0.82205	0.48	0.15	1.11613e-67
Spon2	1.34633e-96	0.806506	0.792	0.316	2.10041e-92
Emp1	8.48501e-73	0.80089	0.654	0.259	1.32375e-68
Scube1	5.18557e-85	0.799811	0.35	0.066	8.09e-81
Sdc1	1.0469e-64	0.798303	0.428	0.128	1.63327e-60
Ramp2	6.05163e-98	0.793491	0.776	0.286	9.44114e-94
Gm1821	1.49295e-93	0.787167	0.849	0.383	2.32916e-89
Mettl7a1	1.05907e-77	0.785145	0.503	0.147	1.65225e-73
Jun	9.30596e-82	0.782395	0.886	0.514	1.45182e-77
Plk2	1.0768e-54	0.780679	0.49	0.187	1.67991e-50
Oxtr	1.14532e-70	0.774919	0.361	0.085	1.78681e-66
Fstl1	3.86301e-92	0.772241	0.865	0.389	6.02669e-88
Anxa1	7.74037e-73	0.763669	0.7	0.285	1.20757e-68
Myc	7.64957e-63	0.762426	0.393	0.113	1.19341e-58
Loxl2	1.58328e-71	0.757614	0.444	0.126	2.47008e-67
Gng12	2.11757e-73	0.754827	0.75	0.342	3.30362e-69
Plod2	2.14662e-68	0.753631	0.456	0.137	3.34895e-64
Cd34	8.22097e-89	0.753579	0.813	0.334	1.28255e-84
Meg3	7.1632e-61	0.744773	0.478	0.163	1.11753e-56
Dio2	9.57256e-66	0.743934	0.456	0.137	1.49341e-61
Raly	1.2746e-94	0.742051	0.917	0.454	1.9885e-90
Ftl1-ps1	1.3158e-99	0.74023	0.897	0.41	2.05278e-95
Igf1	1.74955e-80	0.737156	0.702	0.267	2.72948e-76
Inhbb	2.7131e-63	0.735886	0.44	0.139	4.23271e-59
Gm8730	6.84536e-66	0.733619	0.595	0.236	1.06794e-61
Prss23	8.41587e-92	0.732167	0.893	0.423	1.31296e-87
Hk2	1.91656e-44	0.727447	0.428	0.166	2.99003e-40
Trabd2b	6.18768e-61	0.726891	0.346	0.091	9.65341e-57
Rps19-ps6	5.79109e-72	0.724862	0.655	0.259	9.03468e-68
Cryab	5.21595e-42	0.72018	0.448	0.185	8.13741e-38
Emb	1.89329e-53	0.714635	0.446	0.161	2.95373e-49
Pim1	7.23052e-63	0.70409	0.714	0.337	1.12803e-58
Kdelr3	5.55236e-70	0.701931	0.428	0.116	8.66224e-66
Umps	9.55383e-52	0.69275	0.332	0.096	1.49049e-47
Il17ra	5.95862e-63	0.69219	0.32	0.075	9.29604e-59
Serpinh1	1.07601e-92	0.690019	0.963	0.561	1.67869e-88
Vim	1.60342e-81	0.689893	0.861	0.413	2.5015e-77
Wnt5a	9.61236e-63	0.68738	0.309	0.069	1.49962e-58
Vapa	1.07652e-59	0.685425	0.552	0.211	1.67947e-55
Rcn3	3.55022e-72	0.682432	0.739	0.308	5.53869e-68
Rps6-ps4	5.14376e-76	0.680905	0.741	0.303	8.02478e-72
Ubc	1.71281e-104	0.678223	0.986	0.759	2.67215e-100
Idh1	2.97904e-60	0.678034	0.337	0.085	4.6476e-56
Gm15427	1.58342e-96	0.673525	0.975	0.553	2.47029e-92
Lrig1	2.74544e-60	0.667762	0.256	0.05	4.28316e-56
Itga5	2.96665e-36	0.66076	0.348	0.132	4.62828e-32
Tppp3	7.31094e-67	0.658981	0.49	0.156	1.14058e-62
Ebf1	1.06692e-58	0.652615	0.423	0.128	1.66451e-54
Gm10736	6.92769e-84	0.645057	0.959	0.573	1.08079e-79
Tuba1a	3.181e-74	0.643408	0.833	0.375	4.96267e-70
Gm5905	9.37247e-68	0.63792	0.691	0.279	1.4622e-63
Akr1c14	4.52065e-36	0.635064	0.258	0.08	7.05266e-32
Fos	1.55141e-74	0.635047	0.95	0.66	2.42036e-70
Eef1a1	5.23322e-97	0.63485	0.984	0.696	8.16434e-93
Rpl18-ps1	1.7871e-49	0.634467	0.501	0.203	2.78806e-45
Zxdc	1.69898e-57	0.633022	0.258	0.053	2.65058e-53
Eif4e	1.05969e-43	0.62658	0.469	0.194	1.65323e-39
Des	9.02738e-62	0.618732	0.508	0.17	1.40836e-57
Arl4c	3.00912e-41	0.61621	0.362	0.129	4.69453e-37
Selenos	7.85758e-49	0.613974	0.506	0.205	1.22586e-44
Anxa2	1.40704e-70	0.612929	0.913	0.457	2.19513e-66
Qpct	2.71167e-54	0.612778	0.268	0.06	4.23047e-50
Tnfaip3	2.23906e-32	0.611287	0.323	0.124	3.49316e-28
Gm10076	2.1704e-61	0.610865	0.803	0.396	3.38603e-57
Rpl37rt	3.92722e-58	0.609683	0.716	0.323	6.12686e-54
Calu	6.02272e-52	0.606856	0.552	0.221	9.39604e-48
Eln	8.91793e-53	0.606657	0.492	0.181	1.39129e-48
Gm13588	1.11237e-54	0.605466	0.526	0.198	1.7354e-50
Rpl14-ps1	4.3041e-57	0.601636	0.583	0.23	6.71482e-53
Adam12	1.41022e-48	0.601536	0.274	0.07	2.20008e-44
Nme2	4.95364e-44	0.596084	0.387	0.14	7.72817e-40
Twist2	3.50468e-53	0.594219	0.405	0.127	5.46766e-49
Tmem109	1.51494e-46	0.59359	0.414	0.148	2.36345e-42
Ssr3	6.59582e-52	0.590963	0.544	0.217	1.02901e-47
Srm	5.25329e-42	0.587665	0.353	0.123	8.19566e-38
Arf4	8.57793e-51	0.586019	0.709	0.345	1.33824e-46
Rps26-ps1	1.09831e-54	0.584344	0.565	0.224	1.71348e-50
Col1a2	4.31543e-86	0.584151	0.996	0.654	6.73251e-82
Laptm4a	4.77922e-69	0.5839	0.934	0.611	7.45605e-65
Gm10177	5.90726e-40	0.582789	0.398	0.156	9.21592e-36
Rps23-ps1	2.10314e-51	0.581085	0.607	0.266	3.28111e-47
Btg1	2.63324e-59	0.579494	0.615	0.244	4.10811e-55
Rcn1	7.1019e-49	0.578676	0.412	0.142	1.10797e-44
Txndc5	1.51708e-40	0.576985	0.329	0.112	2.3668e-36
Ppic	2.5861e-53	0.572913	0.565	0.22	4.03457e-49
Smoc2	9.4433e-44	0.570331	0.295	0.084	1.47325e-39
Sparc	1.78748e-88	0.568791	1	0.8	2.78865e-84
Plpp3	7.22372e-42	0.568642	0.552	0.239	1.12697e-37
Maged2	1.47841e-50	0.566139	0.371	0.114	2.30647e-46
Aldh1a1	5.25932e-39	0.565458	0.282	0.088	8.20507e-35
Gm4366	4.61613e-40	0.565329	0.464	0.196	7.20162e-36
Rpl3-ps1	3.88198e-50	0.563928	0.634	0.288	6.05627e-46
Ltbp4	1.83267e-50	0.561787	0.59	0.242	2.85916e-46
Rpl6l	1.03872e-41	0.561583	0.389	0.146	1.6205e-37
Oaf	1.49023e-36	0.558603	0.302	0.102	2.3249e-32
Gm5805	6.1044e-59	0.556095	0.805	0.393	9.52348e-55
Tmem100	4.31069e-40	0.551791	0.307	0.097	6.72511e-36
Ugp2	1.81541e-36	0.550481	0.298	0.101	2.83223e-32
Cd248	4.63015e-41	0.549785	0.366	0.128	7.2235e-37
Mxra8	3.06033e-50	0.549193	0.391	0.124	4.77441e-46
Gm6204	6.86181e-44	0.547131	0.451	0.178	1.07051e-39
Col3a1	1.90315e-77	0.546255	0.961	0.561	2.9691e-73
Rpl36a-ps2	1.05895e-37	0.54621	0.4	0.161	1.65207e-33
Klf9	3.37202e-45	0.544992	0.575	0.246	5.26069e-41
Hspb8	2.07744e-42	0.542958	0.334	0.107	3.24101e-38
Dap	2.09868e-47	0.541059	0.512	0.205	3.27416e-43
Maged1	8.9151e-53	0.540056	0.586	0.235	1.39085e-48
Sphk1	1.54089e-39	0.536897	0.291	0.09	2.40395e-35
Tceal8	4.72847e-49	0.536802	0.504	0.192	7.37689e-45
Ifrd1	2.62337e-45	0.536092	0.734	0.379	4.09272e-41
Sdc4	1.63592e-27	0.535276	0.293	0.118	2.55221e-23
Anxa5	7.03737e-49	0.532164	0.831	0.465	1.0979e-44
Trib1	3.8109e-42	0.531089	0.362	0.125	5.94538e-38
Fbxo32	1.09944e-44	0.530841	0.29	0.08	1.71523e-40
Dnajb4	3.60528e-38	0.52931	0.359	0.13	5.6246e-34
Col15a1	3.24338e-47	0.528362	0.476	0.177	5.05999e-43
Dcn	6.32504e-77	0.528306	0.998	0.761	9.8677e-73
Uba52	5.78427e-50	0.528268	0.735	0.357	9.02404e-46
Steap3	4.08615e-41	0.527775	0.275	0.079	6.37481e-37
Kdelr2	3.05612e-36	0.525414	0.357	0.135	4.76785e-32
Fn1	8.14113e-58	0.521396	0.652	0.261	1.2701e-53
Gm12481	9.10639e-39	0.521051	0.478	0.209	1.42069e-34
Gm9794	2.14064e-40	0.519747	0.577	0.266	3.33961e-36
Rpl10a-ps1	3.45067e-45	0.518735	0.65	0.306	5.38339e-41
Msrb2	9.16028e-37	0.517549	0.311	0.105	1.4291e-32
Loxl1	1.12429e-44	0.517316	0.437	0.161	1.75401e-40
Tubb6	6.97987e-44	0.513598	0.485	0.192	1.08893e-39
Ier2	4.47138e-38	0.51267	0.744	0.426	6.9758e-34
Man1a	1.31836e-30	0.510857	0.266	0.092	2.05677e-26
Rps27rt	9.18689e-39	0.510692	0.552	0.262	1.43325e-34
Pgr	1.2355e-37	0.509017	0.302	0.099	1.9275e-33
Gm6136	1.55864e-35	0.508814	0.43	0.183	2.43163e-31
Morf4l2	3.28336e-41	0.507237	0.526	0.231	5.12237e-37
Klf6	3.52389e-39	0.505121	0.622	0.302	5.49763e-35
Col5a2	1.44097e-49	0.503737	0.519	0.195	2.24806e-45
Gm10073	1.45494e-43	0.503096	0.453	0.179	2.26985e-39
Gm12918	1.91276e-26	0.499886	0.277	0.109	2.9841e-22
Cd320	2.11253e-39	0.4985	0.321	0.106	3.29575e-35
Myh10	4.24194e-37	0.497445	0.274	0.084	6.61785e-33
2310022B05Rik	9.57895e-44	0.494298	0.421	0.152	1.49441e-39
Rps6	3.28577e-52	0.493371	0.922	0.522	5.12613e-48
Rps3a2	1.94838e-39	0.491608	0.462	0.193	3.03967e-35
Gm26384	2.07155e-35	0.485217	0.284	0.094	3.23183e-31
Tcf4	6.82707e-47	0.482023	0.52	0.201	1.06509e-42
Gm11361	1.3208e-44	0.479398	0.826	0.461	2.06058e-40
Igsf10	1.16657e-38	0.479029	0.297	0.093	1.81997e-34
Pnp	6.59183e-33	0.47731	0.426	0.186	1.02839e-28
Yipf5	2.59078e-33	0.474561	0.371	0.149	4.04188e-29
Gm8292	9.18761e-36	0.470631	0.252	0.075	1.43336e-31
Sec24d	3.59656e-40	0.469956	0.307	0.096	5.61099e-36
Sec61g	4.81678e-40	0.468594	0.673	0.334	7.51465e-36
Surf4	6.6561e-36	0.467264	0.526	0.241	1.03842e-31
Ckap4	9.49679e-36	0.466848	0.345	0.125	1.48159e-31
Gm11808	5.87563e-35	0.466385	0.396	0.16	9.16657e-31
Egr1	6.08468e-48	0.464894	0.874	0.498	9.4927e-44
Gm5835	2.90498e-32	0.462981	0.318	0.12	4.53205e-28
Tmed2	1.73101e-39	0.462129	0.517	0.226	2.70055e-35
Igfbp6	3.81065e-52	0.458485	0.84	0.426	5.945e-48
Eif1a	8.68438e-30	0.458384	0.341	0.139	1.35485e-25
Myadm	4.44204e-31	0.456661	0.293	0.106	6.93003e-27
Serf2	4.01872e-40	0.454783	0.828	0.49	6.26961e-36
Prkcdbp	4.03599e-36	0.453557	0.545	0.252	6.29655e-32
Pnrc1	7.52211e-39	0.45302	0.664	0.326	1.17352e-34
Tpm4	4.07774e-39	0.452586	0.677	0.34	6.36168e-35
Gsn	3.425e-49	0.452002	0.908	0.524	5.34335e-45
P4hb	8.45639e-36	0.447987	0.75	0.408	1.31928e-31
Csrnp1	5.14312e-32	0.446213	0.348	0.136	8.02378e-28
Btg2	4.08444e-30	0.4448	0.56	0.283	6.37214e-26
Cav1	1.68886e-36	0.443496	0.384	0.143	2.63479e-32
Eif4a2	3.09737e-32	0.443008	0.458	0.208	4.8322e-28
Lmna	4.13793e-32	0.440427	0.499	0.234	6.45559e-28
Gm6472	8.29636e-26	0.440041	0.323	0.139	1.29432e-21
Lox	9.7443e-44	0.438567	0.538	0.219	1.52021e-39
Gm15772	8.64204e-33	0.43665	0.41	0.174	1.34825e-28
S100a16	2.71655e-32	0.436627	0.433	0.188	4.23808e-28
Rpl15	2.94642e-36	0.4352	0.86	0.533	4.59672e-32
Gm7600	1.11721e-27	0.434915	0.334	0.14	1.74295e-23
Gm10269	5.10953e-30	0.432025	0.314	0.122	7.97137e-26
Eef1g	1.68082e-34	0.429236	0.796	0.453	2.62225e-30
Gm6274	6.06492e-22	0.42915	0.281	0.123	9.46189e-18
Cdh11	3.69642e-42	0.42683	0.396	0.136	5.76678e-38
Rpl10-ps3	9.06282e-33	0.426351	0.595	0.302	1.41389e-28
Gapdh	1.37696e-35	0.423634	0.776	0.427	2.14819e-31
Gas6	1.21315e-33	0.42331	0.552	0.259	1.89263e-29
Gm14165	3.37976e-27	0.423089	0.364	0.161	5.27276e-23
Rps25-ps1	6.2517e-29	0.421928	0.355	0.152	9.75328e-25
Tmem119	2.73786e-32	0.421786	0.394	0.16	4.27133e-28
Cd81	9.15018e-36	0.419208	0.698	0.365	1.42752e-31
Serpinf1	4.23433e-37	0.418776	0.602	0.287	6.60598e-33
Actg1	7.11541e-40	0.418005	0.915	0.596	1.11008e-35
Ube2g2	1.36629e-28	0.417841	0.256	0.089	2.13155e-24
Mir703	1.10595e-27	0.417059	0.487	0.238	1.7254e-23
Cstb	3.04034e-34	0.416256	0.664	0.343	4.74323e-30
Sec31a	3.4881e-33	0.415707	0.329	0.121	5.44178e-29
Gm12174	4.10881e-26	0.414913	0.385	0.178	6.41016e-22
Zfand5	5.02264e-30	0.414783	0.538	0.267	7.83582e-26
Sar1a	3.8199e-30	0.414319	0.471	0.221	5.95942e-26
RP23-269H21.1	2.40663e-31	0.413748	0.396	0.166	3.75458e-27
Adamts2	1.14564e-35	0.412406	0.492	0.211	1.78732e-31
Rpn1	3.76742e-28	0.410837	0.398	0.179	5.87756e-24
Ddost	1.41419e-29	0.410333	0.51	0.248	2.20628e-25
Rps15a-ps6	1.44507e-26	0.407994	0.369	0.166	2.25445e-22
Gm7808	4.34357e-30	0.407802	0.549	0.278	6.7764e-26
Rpl28-ps1	6.49129e-27	0.406304	0.435	0.208	1.01271e-22
Lrp1	1.19221e-33	0.405316	0.44	0.184	1.85997e-29
RP23-288C18.3	1.12819e-25	0.403997	0.277	0.109	1.76009e-21
Col4a1	5.47304e-39	0.403874	0.677	0.319	8.5385e-35
Rpl9-ps6	1.20091e-24	0.402754	0.373	0.175	1.87354e-20
Cyb5a	2.09034e-35	0.40146	0.679	0.346	3.26114e-31
Gm15421	1.55039e-23	0.400462	0.259	0.105	2.41876e-19
Ckb	6.43545e-32	0.400456	0.446	0.195	1.00399e-27
Gm12254	1.43187e-26	0.397505	0.254	0.094	2.23386e-22
S100a10	6.21247e-33	0.397089	0.803	0.46	9.69208e-29
Ehd2	1.09555e-31	0.395112	0.307	0.111	1.70916e-27
Rps15a-ps7	4.08431e-23	0.393708	0.357	0.168	6.37194e-19
Dnajb1	1.41651e-31	0.389443	0.636	0.331	2.2099e-27
Gm2000	1.69179e-34	0.38908	0.893	0.554	2.63936e-30
Pofut2	5.79407e-31	0.388606	0.304	0.111	9.03932e-27
Thy1	8.33982e-26	0.388419	0.284	0.11	1.30109e-21
Maf	8.00001e-33	0.388345	0.647	0.328	1.24808e-28
Rpl19-ps11	1.1254e-26	0.387099	0.307	0.125	1.75574e-22
Gm5586	3.73038e-27	0.384755	0.464	0.227	5.81976e-23
Gm3788	7.15583e-29	0.382159	0.313	0.122	1.11638e-24
Myl6	6.8172e-36	0.378247	0.911	0.592	1.06355e-31
Rpl34-ps1	1.47475e-29	0.376398	0.425	0.19	2.30076e-25
Jund	3.27986e-30	0.37639	0.671	0.365	5.11692e-26
Swi5	9.27781e-29	0.375157	0.766	0.434	1.44743e-24
Rpl31-ps8	5.92885e-25	0.3744	0.419	0.203	9.2496e-21
Fermt2	3.27157e-26	0.374055	0.279	0.105	5.10398e-22
Tpt1-ps3	2.17806e-30	0.372253	0.494	0.233	3.398e-26
Wdr89	8.47381e-30	0.371601	0.625	0.325	1.322e-25
Fkbp9	5.64172e-27	0.371423	0.272	0.1	8.80165e-23
Gm10132	1.01547e-22	0.369497	0.293	0.127	1.58423e-18
Aldh7a1	4.43458e-25	0.364316	0.293	0.118	6.91839e-21
Hdlbp	7.35333e-24	0.363722	0.336	0.149	1.14719e-19
Pgrmc1	1.17605e-26	0.363449	0.373	0.165	1.83476e-22
Ppp1r15a	6.56178e-31	0.363092	0.558	0.272	1.0237e-26
Wls	4.22287e-25	0.363003	0.272	0.105	6.5881e-21
S100a6	3.63394e-35	0.362999	0.883	0.528	5.66931e-31
Ilk	4.04018e-28	0.362058	0.456	0.215	6.30308e-24
Serp1	6.45181e-26	0.361918	0.554	0.289	1.00655e-21
Vkorc1	1.85341e-26	0.361071	0.391	0.176	2.89151e-22
Nfkbia	2.8764e-39	0.359348	0.853	0.513	4.48748e-35
Mmp23	3.16839e-27	0.35776	0.394	0.174	4.943e-23
Gm14303	7.83644e-29	0.357574	0.78	0.451	1.22256e-24
Thbs1	5.94119e-37	0.356454	0.584	0.271	9.26885e-33
Copa	2.099e-28	0.354349	0.339	0.138	3.27465e-24
Wipi1	4.36772e-25	0.353993	0.332	0.143	6.81408e-21
Phlda1	2.96577e-27	0.353463	0.655	0.353	4.6269e-23
Adprh	1.2122e-26	0.351098	0.412	0.185	1.89115e-22
Gm6807	3.77682e-21	0.349679	0.307	0.14	5.89222e-17
mt-Nd3	1.82437e-27	0.347861	0.545	0.28	2.84619e-23
Map1lc3a	9.75587e-31	0.347083	0.625	0.314	1.52201e-26
Fkbp7	2.21833e-24	0.345737	0.318	0.134	3.46081e-20
Mfge8	1.2641e-27	0.34468	0.453	0.208	1.97213e-23
Ehd1	2.29168e-21	0.344399	0.275	0.119	3.57524e-17
Gm5526	2.81594e-21	0.343115	0.258	0.106	4.39316e-17
Sqstm1	2.13631e-26	0.343017	0.762	0.455	3.33286e-22
Myl12a	1.43255e-28	0.342905	0.84	0.525	2.23492e-24
Itgb5	5.07308e-28	0.341692	0.274	0.096	7.91452e-24
Gpx8	5.1925e-26	0.341566	0.552	0.284	8.10082e-22
Rpl35	6.69288e-34	0.34099	0.972	0.732	1.04416e-29
Rab1a	2.67166e-25	0.340255	0.497	0.248	4.16805e-21
Xbp1	4.75149e-23	0.339898	0.456	0.234	7.41279e-19
Il6st	2.93347e-28	0.338663	0.432	0.195	4.5765e-24
Scd2	1.60494e-26	0.337194	0.435	0.205	2.50387e-22
Ahnak	2.49845e-23	0.336825	0.343	0.152	3.89783e-19
Gm8430	2.00693e-22	0.336736	0.472	0.245	3.13101e-18
Eif4ebp1	3.77033e-24	0.335864	0.339	0.15	5.88209e-20
Gnl3	2.20154e-23	0.334076	0.261	0.103	3.43462e-19
Tpm2	3.30822e-32	0.333754	0.538	0.258	5.16115e-28
Sec22b	5.04406e-21	0.331936	0.284	0.123	7.86924e-17
Ptrf	1.54475e-25	0.331019	0.32	0.132	2.40996e-21
Pim3	1.32692e-25	0.331011	0.339	0.145	2.07013e-21
Rps13-ps2	1.50513e-21	0.330731	0.435	0.223	2.34815e-17
Rpl36-ps2	4.03076e-17	0.329379	0.252	0.116	6.28838e-13
Pink1	1.9587e-24	0.32901	0.266	0.101	3.05577e-20
Prkar1a	4.77145e-25	0.328242	0.524	0.267	7.44394e-21
Herpud1	3.52894e-22	0.328071	0.352	0.164	5.50551e-18
Ost4	1.20573e-22	0.325898	0.481	0.253	1.88106e-18
Dstn	7.84907e-21	0.325151	0.378	0.186	1.22453e-16
Arl1	3.1143e-22	0.324115	0.369	0.175	4.85863e-18
Aqp1	5.36743e-22	0.32336	0.348	0.163	8.37373e-18
Axl	2.03324e-26	0.323152	0.339	0.14	3.17206e-22
Lamb1	2.69058e-22	0.322815	0.258	0.102	4.19758e-18
Gm9385	3.36743e-21	0.322306	0.405	0.201	5.25353e-17
Dusp1	4.41201e-21	0.321305	0.803	0.549	6.88318e-17
Copg1	1.33668e-20	0.319139	0.252	0.104	2.08535e-16
Slc25a39	1.96451e-20	0.318719	0.346	0.166	3.06484e-16
Tubb2a	4.08591e-16	0.317908	0.321	0.165	6.37443e-12
Bzw1	2.06583e-20	0.317109	0.361	0.175	3.2229e-16
Rps10-ps2	1.83751e-22	0.316796	0.361	0.169	2.8667e-18
Rdx	1.03866e-18	0.316572	0.293	0.137	1.62041e-14
Sec61b	8.45435e-23	0.31546	0.76	0.452	1.31896e-18
Gm10288	3.75891e-20	0.313331	0.439	0.228	5.86428e-16
Ssr1	1.19405e-18	0.312741	0.29	0.136	1.86284e-14
Sap18	1.2003e-19	0.312736	0.4	0.203	1.87259e-15
Angptl4	2.82453e-19	0.311869	0.268	0.116	4.40654e-15
Hsph1	4.13852e-18	0.311194	0.27	0.123	6.45651e-14
Sec13	2.78109e-19	0.310092	0.355	0.177	4.33877e-15
Plod1	1.79188e-23	0.310086	0.387	0.178	2.79552e-19
Lgals1	5.53547e-35	0.30932	0.98	0.823	8.63589e-31
Col18a1	6.44789e-32	0.308812	0.306	0.105	1.00593e-27
Copb2	3.37544e-20	0.30801	0.266	0.115	5.26603e-16
Ccnl1	6.48985e-21	0.306631	0.456	0.235	1.01248e-16
Copz2	7.52456e-22	0.3044	0.272	0.112	1.17391e-17
Col4a2	8.36754e-30	0.303468	0.494	0.221	1.30542e-25
Ppp3ca	1.03467e-22	0.302203	0.263	0.104	1.61418e-18
Stt3a	4.36204e-18	0.30059	0.259	0.117	6.80521e-14
Cnn3	2.99323e-23	0.300319	0.407	0.192	4.66973e-19
Ewsr1	3.63148e-17	0.299974	0.284	0.136	5.66548e-13
Gm6863	2.50755e-15	0.299639	0.323	0.169	3.91203e-11
Bst2	3.01764e-24	0.295245	0.641	0.356	4.70783e-20
Cebpd	4.36331e-28	0.294065	0.385	0.166	6.8072e-24
Rpl4	5.11314e-28	0.290869	0.973	0.755	7.977e-24
Zfp36l1	9.95167e-20	0.287991	0.591	0.337	1.55256e-15
Bhlhe40	6.16108e-19	0.286949	0.435	0.232	9.6119e-15
Bag3	6.8107e-20	0.286938	0.254	0.107	1.06254e-15
Pdia6	3.14237e-19	0.284368	0.634	0.37	4.90241e-15
Tbrg1	4.84393e-20	0.284237	0.314	0.144	7.55702e-16
C1s1	2.07492e-26	0.283017	0.407	0.179	3.23709e-22
Ssr4	3.35148e-20	0.28095	0.51	0.28	5.22865e-16
Tmed3	2.67009e-19	0.280062	0.419	0.215	4.1656e-15
Hspa5	1.49019e-19	0.278544	0.829	0.556	2.32485e-15
Capn2	6.89909e-18	0.278092	0.263	0.118	1.07633e-13
Gem	9.05219e-22	0.276683	0.352	0.16	1.41223e-17
Gstp1	1.17393e-15	0.276644	0.306	0.156	1.83145e-11
Gm7536	3.09703e-16	0.276223	0.364	0.194	4.83168e-12
Hnrnpf	2.05421e-21	0.276085	0.4	0.194	3.20478e-17
Pdia3	3.38263e-19	0.275265	0.641	0.369	5.27724e-15
Gm10250	1.1127e-15	0.274278	0.277	0.137	1.73593e-11
Cald1	2.13434e-26	0.27299	0.558	0.277	3.32978e-22
Rhoj	1.86438e-22	0.272916	0.256	0.099	2.90862e-18
Gm3511	1.619e-18	0.272434	0.295	0.137	2.5258e-14
Gm13436	1.32848e-18	0.271151	0.405	0.212	2.07256e-14
Rab7b	2.60985e-19	0.270919	0.252	0.106	4.07163e-15
Ubb	3.56789e-41	0.268816	0.998	0.97	5.56626e-37
Palld	1.56102e-22	0.267746	0.314	0.134	2.43535e-18
C1ra	2.56041e-24	0.2673	0.282	0.11	3.99449e-20
Gm4149	1.48605e-23	0.26671	0.529	0.272	2.31839e-19
Nucb1	5.1704e-18	0.266603	0.327	0.16	8.06634e-14
Ggt5	6.77295e-24	0.264992	0.398	0.183	1.05665e-19
Gm10275	1.95566e-17	0.263791	0.357	0.182	3.05102e-13
Serpinb6a	6.93133e-17	0.262724	0.337	0.17	1.08136e-12
Socs2	6.85253e-16	0.258305	0.279	0.134	1.06906e-11
Ctsh	9.36449e-22	0.258297	0.501	0.261	1.46095e-17
Tmem258	1.42291e-19	0.257984	0.68	0.396	2.21989e-15
Rplp0	1.98671e-27	0.25718	0.982	0.832	3.09947e-23
Ftl1	5.27691e-36	0.256947	0.993	0.881	8.23251e-32
Sec61a1	1.37099e-16	0.256412	0.361	0.189	2.13889e-12
Anapc5	1.67161e-18	0.254544	0.33	0.16	2.60787e-14
Anxa6	2.57422e-21	0.254206	0.407	0.199	4.01604e-17
Slc16a2	4.94564e-22	0.25401	0.327	0.142	7.71569e-18
Gm11478	5.23762e-19	0.252384	0.515	0.282	8.17121e-15
Gm9843	6.08967e-20	0.251531	0.568	0.316	9.5005e-16
Rpl10a	2.67695e-16	0.251167	0.819	0.549	4.17631e-12
Ppib	1.18257e-17	0.250531	0.664	0.405	1.84492e-13
Gm14586	5.04903e-18	0.250036	0.481	0.262	7.87699e-14
Cox4i1	6.83859e-05	-0.252421	0.799	0.689	1
Ubl5	0.997789	-0.252909	0.362	0.314	1
Cox7a2l	0.779414	-0.253795	0.38	0.323	1
H3f3b	7.61161e-06	-0.253855	0.909	0.815	0.118749
Srsf3	0.814402	-0.254927	0.29	0.254	1
Atp5o	0.594851	-0.261971	0.366	0.324	1
Cox7b	0.327498	-0.266575	0.456	0.394	1
Ifitm2	0.0327237	-0.266787	0.657	0.554	1
2410006H16Rik	0.585911	-0.267722	0.33	0.276	1
Myl9	0.000368946	-0.268243	0.485	0.333	1
Mt1	0.316923	-0.268596	0.487	0.389	1
Atp5c1	0.779253	-0.274468	0.355	0.309	1
Rpl34	1.4561e-06	-0.275614	0.853	0.749	0.0227166
Ndufa7	0.724101	-0.277447	0.412	0.355	1
Usmg5	0.549107	-0.279761	0.513	0.426	1
Serping1	0.0359333	-0.281068	0.471	0.346	1
Son	0.252699	-0.282774	0.551	0.471	1
Uqcr11	0.728665	-0.284425	0.359	0.312	1
Atp5j2	0.0461369	-0.285149	0.503	0.443	1
Rabac1	0.825605	-0.286944	0.33	0.283	1
Rps24	8.90988e-07	-0.289227	0.845	0.745	0.0139003
Rps10	0.0456804	-0.289724	0.595	0.505	1
Psap	0.0865486	-0.2969	0.544	0.409	1
Arpc1b	0.277672	-0.30025	0.547	0.448	1
Lsp1	0.349729	-0.301382	0.671	0.505	1
mt-Nd4	5.2623e-07	-0.305328	0.963	0.901	0.00820972
Timp2	0.0266575	-0.30591	0.515	0.358	1
Uqcrh	0.0538121	-0.306201	0.588	0.493	1
Cox7c	0.00234477	-0.306432	0.648	0.557	1
Cmtm3	0.149796	-0.309406	0.277	0.215	1
2010107E04Rik	0.373521	-0.314179	0.389	0.345	1
Tpt1	2.94398e-08	-0.318584	0.861	0.765	0.00045929
Rps13	8.2601e-07	-0.320456	0.742	0.668	0.0128866
Cox8a	0.00243448	-0.321017	0.57	0.512	1
Sem1	0.067244	-0.323177	0.46	0.412	1
Smdt1	0.248522	-0.325363	0.327	0.308	1
Cox7a2	0.15162	-0.325829	0.49	0.418	1
Chchd2	0.00125286	-0.331828	0.584	0.526	1
Cdk4	0.96601	-0.335351	0.311	0.271	1
Rps27l	0.0120346	-0.344115	0.512	0.459	1
Tmem256	0.427413	-0.345634	0.256	0.243	1
Arpc2	0.160242	-0.345992	0.485	0.414	1
Rpl26	4.476e-13	-0.346793	0.879	0.824	6.98301e-09
Ndufa5	0.369272	-0.348247	0.316	0.292	1
Plac8	0.538643	-0.349108	0.364	0.3	1
mt-Nd1	6.24863e-16	-0.353414	0.98	0.92	9.74849e-12
Id3	0.634917	-0.356056	0.394	0.332	1
Serinc3	0.805298	-0.35655	0.307	0.262	1
Rps27	1.68002e-23	-0.362632	0.984	0.966	2.62101e-19
Hmgb1	0.0574135	-0.363114	0.243	0.255	1
Ndufa6	0.299776	-0.364319	0.366	0.328	1
Ndufa3	0.0114189	-0.365772	0.487	0.446	1
Ndufb9	0.0976664	-0.371859	0.364	0.344	1
Mfap2	0.0314413	-0.372028	0.362	0.258	1
Ctsl	0.141989	-0.378017	0.725	0.593	1
Rpl18	3.21113e-09	-0.37872	0.766	0.695	5.00968e-05
Rps29	1.6456e-29	-0.380189	0.952	0.946	2.5673e-25
Zfas1	0.338154	-0.381134	0.295	0.275	1
Rpl30	6.3038e-09	-0.38315	0.748	0.672	9.83456e-05
Cox6b1	4.51534e-05	-0.383651	0.616	0.549	0.704438
Sub1	0.255185	-0.384472	0.494	0.422	1
Clta	0.1109	-0.386372	0.304	0.294	1
Slc25a5	0.000484638	-0.393282	0.551	0.5	1
Shisa5	0.618756	-0.404709	0.259	0.238	1
Snrpg	0.00553425	-0.407658	0.403	0.386	1
Ctsz	0.129639	-0.423416	0.275	0.27	1
Atp5k	0.00510628	-0.423923	0.38	0.374	1
Actb	2.29316e-13	-0.426137	0.801	0.747	3.57756e-09
Cox5a	0.00673987	-0.430214	0.385	0.369	1
Rpl22	5.09423e-06	-0.440459	0.62	0.557	0.079475
Rpl11	1.92845e-17	-0.443512	0.783	0.763	3.00858e-13
Mif	0.001328	-0.44828	0.558	0.503	1
Atox1	0.0073627	-0.44908	0.387	0.377	1
Mylk	0.0108765	-0.449538	0.38	0.268	1
Aprt	0.0516183	-0.457438	0.245	0.253	1
Cox6c	7.81777e-08	-0.458301	0.68	0.623	0.00121965
Ctla2a	6.06227e-05	-0.469584	0.453	0.485	0.945775
Cd9	0.00179446	-0.476399	0.307	0.329	1
Tomm7	0.013503	-0.493893	0.277	0.284	1
Fth1	9.45504e-17	-0.504652	0.98	0.958	1.47508e-12
Ly6a	0.0322064	-0.506406	0.297	0.298	1
Psma7	7.67669e-05	-0.509267	0.352	0.373	1
Sh3bgrl3	0.0284032	-0.509736	0.364	0.346	1
Gnai2	0.000605968	-0.523701	0.291	0.321	1
Ptms	0.0101628	-0.525952	0.313	0.313	1
Rpl38	9.57896e-24	-0.540276	0.794	0.765	1.49441e-19
Calm1	1.03012e-14	-0.540835	0.742	0.692	1.6071e-10
Atp5j	3.65868e-08	-0.545463	0.456	0.47	0.000570791
Crip1	0.358595	-0.552255	0.563	0.46	1
Jchain	7.76796e-23	-0.565917	0.339	0.156	1.21188e-18
Grn	0.00370136	-0.567075	0.224	0.253	1
Rps21	8.93652e-24	-0.583864	0.694	0.721	1.39419e-19
Ifitm3	1.65597e-17	-0.617252	0.824	0.76	2.58348e-13
Ctsd	0.00298796	-0.627755	0.377	0.371	1
Cyba	2.3345e-06	-0.63548	0.318	0.362	0.0364206
Ptma	8.75613e-33	-0.668782	0.746	0.747	1.36604e-28
Arpc3	5.44288e-10	-0.680728	0.327	0.394	8.49143e-06
Ifi27l2a	7.66867e-05	-0.680804	0.316	0.347	1
Sprr2f	4.29883e-05	-0.703494	0.256	0.163	0.67066
Fxyd5	6.13265e-06	-0.708232	0.215	0.273	0.0956755
Hes1	0.000455161	-0.743894	0.467	0.455	1
Npc2	1.55861e-14	-0.749065	0.453	0.51	2.43158e-10
Mmp2	0.00301665	-0.757206	0.362	0.351	1
H2-D1	2.63533e-15	-0.766004	0.558	0.576	4.11138e-11
H2-K1	1.63255e-12	-0.772978	0.538	0.545	2.54694e-08
Id2	4.78196e-11	-0.824555	0.147	0.258	7.46033e-07
Sox4	2.51849e-06	-0.866819	0.279	0.327	0.0392909
Mmp14	5.37891e-05	-0.867252	0.508	0.471	0.839163
Mdk	3.51407e-08	-0.939846	0.311	0.359	0.00054823
B2m	1.48147e-61	-0.956755	0.858	0.885	2.31124e-57
Hspb1	0.000920332	-0.984717	0.279	0.308	1
Retnlg	7.57496e-07	-1.01514	0.187	0.257	0.0118177
Tmsb4x	4.23682e-115	-1.02192	0.982	0.99	6.60986e-111
Nbl1	4.40564e-07	-1.0458	0.442	0.431	0.00687323
Ier3	1.14447e-10	-1.0552	0.327	0.397	1.78549e-06
Selenop	5.44542e-13	-1.11116	0.314	0.395	8.49541e-09
Fcer1g	2.02539e-10	-1.1238	0.188	0.285	3.15981e-06
Cst3	8.58985e-30	-1.16629	0.54	0.627	1.3401e-25
Gpx3	1.38963e-28	-1.26045	0.671	0.717	2.16796e-24
Tyrobp	2.75995e-16	-1.27405	0.14	0.278	4.30579e-12
Rbp1	2.91186e-26	-1.28195	0.121	0.319	4.54279e-22
Ly6e	6.37059e-33	-1.28362	0.29	0.48	9.93875e-29
Pltp	9.54754e-24	-1.35415	0.076	0.256	1.48951e-19
Tmem176b	8.59123e-32	-1.36106	0.087	0.313	1.34032e-27
Sparcl1	1.9645e-37	-1.52165	0.202	0.439	3.06481e-33
mt-Rnr2	8.78829e-93	-1.58092	0.828	0.911	1.37106e-88
mt-Rnr1	1.1747e-64	-1.65687	0.327	0.615	1.83265e-60
Mmp11	9.35222e-24	-1.78092	0.08	0.257	1.45904e-19
H2-Ab1	0.00624217	-1.85148	0.329	0.326	1
Apoe	1.80139e-42	-1.87534	0.542	0.666	2.81035e-38
Lyz2	7.32813e-07	-1.91502	0.29	0.333	0.0114326
Chchd10	4.15819e-45	-2.15169	0.036	0.32	6.48719e-41
Cd74	2.06604e-08	-2.55589	0.284	0.349	0.000322323
Mgp	8.33339e-94	-3.58213	0.101	0.557	1.30009e-89

## Sheet: 2 s_stromal3_Ramp3_high
Table S2: Representative genes of each cell cluster
	p_val	avg_logFC	pct.1	pct.2	p_val_adj
Ramp3	1.23421e-143	1.30572	0.775	0.268	1.9255e-139
Hsd11b2	1.26842e-155	1.29888	0.765	0.23	1.97887e-151
P2ry14	3.31956e-124	1.28705	0.683	0.223	5.17884e-120
Aldh1a2	1.06869e-133	1.21938	0.771	0.278	1.66727e-129
Fbln2	1.13717e-137	1.19425	0.773	0.264	1.7741e-133
A2m	5.20893e-66	1.16395	0.384	0.112	8.12644e-62
Col6a4	1.60643e-137	1.12123	0.866	0.341	2.5062e-133
Ccl11	7.1819e-126	1.10497	0.641	0.167	1.12045e-121
Htra1	9.99803e-110	1.08191	0.799	0.357	1.55979e-105
Atp8a1	6.13562e-76	1.05945	0.389	0.098	9.57219e-72
Mettl7a1	2.3918e-61	1.01798	0.451	0.158	3.73144e-57
Spon1	2.27922e-80	0.991217	0.577	0.21	3.55582e-76
Gadd45g	3.42042e-127	0.988498	0.968	0.588	5.3362e-123
Col6a2	9.87815e-145	0.984556	0.972	0.55	1.54109e-140
Col6a1	1.63922e-133	0.97745	0.957	0.509	2.55735e-129
Crispld2	4.59466e-84	0.967443	0.709	0.307	7.16814e-80
Ackr3	1.34703e-62	0.964627	0.492	0.184	2.1015e-58
Cd63-ps	4.94301e-98	0.947924	0.762	0.311	7.71159e-94
Sdc1	6.52815e-50	0.938717	0.387	0.138	1.01846e-45
Ogn	3.72954e-85	0.928417	0.734	0.326	5.81845e-81
Col6a3	4.23228e-105	0.923761	0.858	0.399	6.60278e-101
Raly	1.13337e-103	0.917566	0.875	0.464	1.76817e-99
Ngfr	1.75751e-54	0.913229	0.456	0.176	2.7419e-50
Igf1	1.47391e-69	0.906713	0.646	0.279	2.29945e-65
Cyr61	6.93876e-80	0.89457	0.799	0.396	1.08252e-75
Ramp2	1.4918e-80	0.888991	0.7	0.303	2.32735e-76
Ddit4l	7.16823e-68	0.886088	0.57	0.227	1.11832e-63
Mfap5	6.35971e-92	0.877777	0.834	0.414	9.92178e-88
Emb	4.25884e-50	0.869915	0.43	0.166	6.64421e-46
Sptssa	3.87531e-42	0.846411	0.445	0.196	6.04587e-38
Scube1	1.44784e-34	0.836586	0.253	0.084	2.25878e-30
Cd34	2.95735e-69	0.822872	0.724	0.352	4.61376e-65
Oxtr	2.93503e-44	0.801316	0.305	0.097	4.57894e-40
Inhbb	1.71629e-34	0.782877	0.359	0.155	2.67759e-30
Tuba1a	8.55397e-66	0.775209	0.758	0.391	1.3345e-61
Fos	1.57144e-76	0.773138	0.939	0.664	2.4516e-72
Dio2	3.13371e-44	0.772773	0.4	0.148	4.8889e-40
Jun	1.14054e-57	0.76978	0.803	0.531	1.77935e-53
Serpinh1	1.50266e-93	0.763841	0.957	0.565	2.3443e-89
Spon2	6.07832e-55	0.762606	0.678	0.339	9.48279e-51
Col1a1	1.1394e-96	0.757594	0.974	0.624	1.77758e-92
Gng12	1.48898e-55	0.753755	0.693	0.354	2.32295e-51
Loxl2	9.62499e-34	0.752461	0.348	0.144	1.50159e-29
Wnt5a	7.72743e-38	0.751522	0.259	0.079	1.20556e-33
Gm8730	1.06245e-40	0.735798	0.508	0.253	1.65753e-36
Meg3	5.70816e-32	0.730682	0.391	0.18	8.9053e-28
Anxa3	2.53385e-45	0.725269	0.52	0.243	3.95305e-41
Cd164	8.03741e-55	0.725114	0.678	0.354	1.25392e-50
Eef1a1	3.54309e-100	0.719841	0.963	0.701	5.52757e-96
Fosb	2.83041e-50	0.707755	0.728	0.403	4.41572e-46
Gm15427	1.29867e-77	0.704891	0.901	0.568	2.02606e-73
Sdk1	3.94684e-36	0.704686	0.272	0.089	6.15746e-32
Gja1	8.26717e-36	0.701501	0.397	0.171	1.28976e-31
Gm12481	4.68055e-26	0.686804	0.41	0.222	7.30213e-22
Gm1821	7.49383e-56	0.685963	0.756	0.403	1.16911e-51
Rps19-ps6	2.35448e-36	0.680749	0.525	0.284	3.67323e-32
Rpl37rt	4.81699e-45	0.677277	0.629	0.34	7.51498e-41
Tmem119	1.9197e-30	0.676824	0.371	0.166	2.99492e-26
Gm6204	1.05201e-30	0.672071	0.393	0.19	1.64124e-26
Uba52	1.42294e-43	0.670126	0.657	0.373	2.21993e-39
Gm4366	4.24376e-28	0.670036	0.404	0.208	6.62069e-24
Gm8797	3.29159e-47	0.667838	0.7	0.39	5.1352e-43
Rasd1	2.49194e-22	0.667475	0.285	0.129	3.88767e-18
Rpl18-ps1	4.84303e-32	0.667282	0.434	0.217	7.55561e-28
Nppc	1.617e-39	0.664606	0.415	0.168	2.52268e-35
Gas6	1.87253e-27	0.663974	0.49	0.272	2.92134e-23
Trabd2b	6.23519e-22	0.662416	0.251	0.109	9.72753e-18
Gm10076	5.8815e-53	0.661017	0.749	0.408	9.17573e-49
Fstl1	7.87013e-48	0.652294	0.737	0.414	1.22782e-43
Klf4	1.14753e-33	0.642576	0.594	0.336	1.79026e-29
Rps6-ps4	5.02505e-39	0.642162	0.6	0.331	7.83958e-35
Gm5905	3.16962e-34	0.636102	0.546	0.306	4.94492e-30
Gm10736	3.82151e-67	0.629402	0.922	0.583	5.96194e-63
Tnfaip6	2.91119e-30	0.624197	0.425	0.205	4.54175e-26
Rpl3-ps1	7.78998e-37	0.615316	0.562	0.302	1.21532e-32
Rpl36a-ps2	6.74285e-24	0.615039	0.346	0.172	1.05195e-19
Col5a1	8.89254e-34	0.609153	0.49	0.24	1.38732e-29
Gm5805	9.90725e-39	0.607471	0.689	0.416	1.54563e-34
Gm10073	2.79333e-21	0.606894	0.361	0.196	4.35788e-17
Rps26-ps1	7.78465e-24	0.596367	0.434	0.248	1.21448e-19
Gm5835	3.25759e-18	0.590707	0.264	0.131	5.08216e-14
Rps6	1.17472e-53	0.584278	0.845	0.538	1.83268e-49
Ftl1-ps1	4.42285e-58	0.583456	0.819	0.427	6.90009e-54
Calu	3.68988e-26	0.581996	0.447	0.241	5.75658e-22
Mxra8	3.70053e-20	0.578603	0.294	0.142	5.7732e-16
Hspa1a	6.04752e-36	0.576998	0.752	0.533	9.43474e-32
Tppp3	2.42483e-23	0.573191	0.356	0.181	3.78298e-19
Plod2	7.32191e-23	0.573189	0.333	0.161	1.14229e-18
Gm11361	6.2339e-40	0.572525	0.756	0.476	9.72551e-36
Cd248	1.95418e-19	0.569158	0.291	0.143	3.04871e-15
Gm2000	3.82822e-44	0.566214	0.832	0.567	5.97241e-40
Kdelr3	1.76469e-21	0.564507	0.298	0.14	2.75309e-17
Rcn3	4.43322e-33	0.562526	0.6	0.335	6.91626e-29
Msrb2	6.12784e-22	0.55743	0.263	0.114	9.56004e-18
Nme2	7.34643e-14	0.556436	0.277	0.16	1.14612e-09
Ost4	2.53898e-17	0.555958	0.419	0.265	3.96106e-13
Dap	3.13835e-16	0.554128	0.376	0.23	4.89615e-12
Rpl14-ps1	3.6298e-20	0.551999	0.43	0.258	5.66285e-16
Rpl10-ps3	9.35995e-27	0.543045	0.534	0.315	1.46025e-22
Cryab	1.86119e-13	0.538714	0.343	0.205	2.90365e-09
Rps27rt	6.64455e-29	0.537993	0.503	0.272	1.03662e-24
Maged2	1.27361e-18	0.533924	0.272	0.132	1.98696e-14
Rps10-ps2	3.0405e-18	0.530855	0.326	0.177	4.74348e-14
Vkorc1	1.14056e-18	0.530259	0.343	0.185	1.77938e-14
Laptm4a	7.15261e-42	0.527131	0.858	0.626	1.11588e-37
Ggt5	6.18419e-21	0.526404	0.367	0.19	9.64795e-17
Gm13588	5.09984e-21	0.526013	0.399	0.222	7.95626e-17
Gm10177	4.61476e-17	0.524933	0.317	0.172	7.19948e-13
Gm11808	1.0365e-16	0.524892	0.317	0.176	1.61705e-12
Ubc	6.31544e-48	0.521045	0.95	0.767	9.85272e-44
Serf2	7.6649e-31	0.518995	0.73	0.509	1.1958e-26
Maged1	3.89392e-21	0.517546	0.451	0.26	6.0749e-17
Gm12174	2.49751e-12	0.513502	0.309	0.192	3.89636e-08
Rps23-ps1	7.66359e-22	0.511533	0.479	0.29	1.1956e-17
Surf4	6.54808e-17	0.510289	0.421	0.261	1.02157e-12
Rpl6l	6.84425e-14	0.509961	0.287	0.165	1.06777e-09
Igfbp6	2.24237e-34	0.509287	0.734	0.447	3.49832e-30
Sparc	7.93146e-66	0.508532	0.993	0.803	1.23739e-61
Gm6136	2.48359e-18	0.508158	0.356	0.197	3.87464e-14
Prss23	9.5492e-39	0.506958	0.777	0.446	1.48977e-34
Rps3a2	3.12783e-14	0.505182	0.346	0.214	4.87974e-10
Morf4l2	1.01634e-16	0.501173	0.408	0.253	1.58559e-12
Fbn1	7.63132e-16	0.498868	0.346	0.202	1.19056e-11
RP23-269H21.1	8.95697e-14	0.49878	0.309	0.182	1.39738e-09
Eif4a2	4.52526e-18	0.494958	0.385	0.222	7.05986e-14
Rps25-ps1	3.30192e-12	0.492687	0.279	0.166	5.15132e-08
Ppic	7.54215e-25	0.492255	0.454	0.241	1.17665e-20
Anxa5	1.57917e-30	0.492225	0.737	0.484	2.46367e-26
Kdelr2	1.08046e-14	0.491983	0.277	0.15	1.68562e-10
Errfi1	6.75089e-22	0.491667	0.512	0.298	1.05321e-17
Rpl10a-ps1	1.09889e-19	0.491617	0.516	0.331	1.71438e-15
Sec61g	4.3398e-23	0.489651	0.561	0.356	6.77052e-19
Gm3511	3.64881e-15	0.487208	0.27	0.142	5.69251e-11
Dcn	2.18011e-58	0.484571	0.993	0.764	3.40118e-54
Pnp	1.68337e-10	0.484281	0.317	0.206	2.62623e-06
Rpl28-ps1	3.1801e-15	0.481596	0.365	0.222	4.96127e-11
Bst2	1.41083e-20	0.4806	0.561	0.372	2.20103e-16
Adprh	8.37112e-16	0.48009	0.348	0.198	1.30598e-11
Hspa1b	3.06799e-18	0.478704	0.41	0.237	4.78638e-14
Plk2	4.93734e-16	0.478678	0.365	0.21	7.70274e-12
Sar1a	1.77955e-17	0.47549	0.399	0.235	2.77628e-13
Cd81	2.56608e-25	0.471813	0.607	0.382	4.00335e-21
Tmem109	2.59265e-16	0.470182	0.311	0.168	4.04479e-12
Rpl34-ps1	7.33133e-11	0.470017	0.318	0.209	1.14376e-06
Ckap4	1.38444e-13	0.468972	0.261	0.141	2.15986e-09
Gm14165	3.59078e-11	0.464491	0.287	0.176	5.60197e-07
Gm9794	3.31722e-18	0.463547	0.46	0.288	5.1752e-14
Ier2	6.53213e-22	0.463509	0.637	0.447	1.01908e-17
Arl4c	1.49074e-15	0.462796	0.279	0.145	2.3257e-11
Gm7600	6.86661e-11	0.46255	0.259	0.154	1.07126e-06
Serpinf1	2.62862e-21	0.462126	0.507	0.305	4.10092e-17
P4hb	3.81054e-22	0.458656	0.633	0.43	5.94483e-18
Ckb	9.97956e-16	0.452033	0.365	0.211	1.55691e-11
Rps15a-ps6	1.05484e-11	0.44796	0.292	0.18	1.64566e-07
Lrp1	5.70607e-17	0.446599	0.361	0.199	8.90204e-13
Gm15772	4.11652e-11	0.446112	0.309	0.193	6.42218e-07
Selenos	2.66673e-14	0.445014	0.372	0.23	4.16036e-10
Srm	4.26395e-13	0.44398	0.257	0.141	6.65219e-09
Cope	3.99784e-14	0.440468	0.38	0.237	6.23704e-10
Gm7808	3.47364e-16	0.438569	0.458	0.295	5.41923e-12
Rps15a-ps7	4.04492e-12	0.438248	0.3	0.179	6.31048e-08
Mmp19	1.66995e-10	0.437582	0.281	0.17	2.60529e-06
Gm14303	4.20121e-25	0.434662	0.704	0.467	6.5543e-21
Lox	9.65773e-13	0.434217	0.387	0.247	1.5067e-08
Gm11478	1.90537e-16	0.430953	0.458	0.294	2.97256e-12
Rpl35	1.44051e-42	0.428165	0.937	0.74	2.24734e-38
Rpl9-ps6	2.86309e-11	0.425566	0.302	0.188	4.46671e-07
Scd2	1.11462e-10	0.424859	0.339	0.222	1.73892e-06
Tubb2a	1.1504e-09	0.424857	0.276	0.174	1.79473e-05
Ilk	9.08206e-15	0.423706	0.38	0.229	1.41689e-10
Map1lc3a	7.04927e-19	0.423291	0.527	0.333	1.09976e-14
Gm5586	4.65659e-12	0.423181	0.374	0.244	7.26475e-08
Gm15500	2.09075e-12	0.421747	0.35	0.22	3.26178e-08
mt-Nd3	8.80291e-15	0.420234	0.456	0.297	1.37334e-10
Eef1g	6.40901e-23	0.418963	0.691	0.474	9.99869e-19
Rpl31-ps8	1.23512e-10	0.418906	0.335	0.219	1.92691e-06
Ltbp4	3.21089e-14	0.417003	0.43	0.272	5.0093e-10
Gpx8	5.01404e-18	0.416376	0.482	0.298	7.82241e-14
Rcn1	1.62835e-10	0.412576	0.274	0.167	2.54038e-06
Tmed2	2.27175e-11	0.408315	0.376	0.252	3.54415e-07
Ift20	8.18542e-10	0.407609	0.337	0.225	1.27701e-05
Wdr89	6.96959e-18	0.401002	0.527	0.344	1.08733e-13
Tmed3	1.86538e-11	0.399472	0.356	0.227	2.91018e-07
Anxa2	3.97568e-26	0.397658	0.758	0.486	6.20245e-22
Slc25a39	1.8564e-10	0.395135	0.287	0.178	2.89617e-06
Gas5	3.37105e-26	0.391668	0.825	0.624	5.25917e-22
Gstp1	2.2881e-08	0.390121	0.257	0.166	0.000356966
Gm9385	1.0383e-08	0.38993	0.317	0.217	0.000161985
Wipi1	8.93699e-12	0.388161	0.27	0.155	1.39426e-07
Swi5	1.76875e-15	0.387674	0.626	0.46	2.75943e-11
Hdlbp	8.40121e-09	0.386243	0.259	0.163	0.000131067
Tcf4	1.80225e-17	0.385296	0.402	0.223	2.81169e-13
Gsn	4.0554e-31	0.383637	0.821	0.541	6.32683e-27
Tnfrsf12a	2.06914e-06	0.381868	0.268	0.188	0.0322807
Rpl4	2.49873e-33	0.379569	0.924	0.765	3.89827e-29
Ppp1r15a	1.09558e-12	0.379197	0.445	0.294	1.70922e-08
Rpl39-ps	1.96922e-09	0.378195	0.324	0.217	3.07218e-05
Col1a2	2.19058e-41	0.37806	0.953	0.664	3.41752e-37
Yipf5	6.61357e-08	0.376905	0.259	0.169	0.00103178
Ssr3	1.01793e-09	0.3761	0.365	0.249	1.58808e-05
Rhob	6.63718e-13	0.375472	0.408	0.255	1.03547e-08
Dstn	3.86771e-11	0.374208	0.318	0.197	6.03402e-07
Ppib	2.25859e-17	0.374147	0.611	0.416	3.52362e-13
Lgals1	5.33314e-35	0.373618	0.966	0.827	8.32023e-31
Gm13436	1.89046e-10	0.371864	0.345	0.224	2.94931e-06
Egr1	5.98514e-19	0.370974	0.717	0.527	9.33742e-15
Tceal8	3.26471e-10	0.370263	0.343	0.221	5.09327e-06
Tmem258	9.13294e-15	0.370126	0.587	0.413	1.42483e-10
Sec61a1	1.09247e-08	0.369385	0.302	0.2	0.000170437
Mmp23	1.04255e-09	0.367998	0.302	0.191	1.62648e-05
Mfge8	7.73976e-12	0.365056	0.361	0.225	1.20748e-07
2310022B05Rik	7.90478e-13	0.361016	0.304	0.174	1.23322e-08
Vim	5.93101e-20	0.360525	0.683	0.446	9.25297e-16
Fn1	9.43841e-18	0.360089	0.492	0.291	1.47249e-13
mt-Co1	5.16814e-38	0.359602	0.976	0.853	8.06281e-34
Rab6a	3.08391e-09	0.35598	0.259	0.159	4.81121e-05
Rpl15	4.23528e-20	0.355842	0.78	0.549	6.60745e-16
Anxa1	1.74226e-14	0.355497	0.497	0.322	2.7181e-10
Hspa5	5.19044e-16	0.353345	0.767	0.568	8.0976e-12
Serpine1	2.88692e-06	0.353324	0.268	0.183	0.0450389
Sec61b	2.67945e-11	0.350301	0.613	0.479	4.18021e-07
Ddost	1.13797e-07	0.350146	0.374	0.273	0.00177534
Gm10288	4.21147e-08	0.349378	0.348	0.245	0.000657031
Cald1	2.65412e-18	0.349273	0.486	0.291	4.1407e-14
Gpx4	6.07676e-08	0.348599	0.408	0.305	0.000948036
Pgrmc1	6.94487e-07	0.347941	0.272	0.184	0.0108347
Gm6863	3.36029e-07	0.347118	0.266	0.18	0.00524238
Adm	1.89801e-05	0.345579	0.281	0.208	0.296108
Tpm4	8.96637e-15	0.343669	0.54	0.366	1.39884e-10
Myl6	1.22023e-19	0.343058	0.806	0.612	1.90368e-15
Prkar1a	5.93616e-11	0.342509	0.421	0.287	9.261e-07
Col3a1	1.02705e-39	0.341861	0.905	0.573	1.6023e-35
Ebf1	1.53277e-12	0.340627	0.281	0.154	2.39127e-08
Rplp0	4.08315e-31	0.340205	0.948	0.838	6.37012e-27
Vapa	3.89603e-08	0.339897	0.352	0.248	0.000607819
Axl	1.70625e-09	0.339346	0.259	0.155	2.66192e-05
Gm14586	5.89185e-09	0.337523	0.391	0.279	9.19188e-05
Dnajb1	3.17692e-09	0.337032	0.484	0.359	4.95632e-05
Herpud1	5.80337e-10	0.336155	0.287	0.176	9.05383e-06
Klf6	2.90903e-08	0.3359	0.458	0.331	0.000453838
Des	1.27802e-16	0.33289	0.363	0.197	1.99384e-12
Mir703	6.25146e-10	0.332066	0.382	0.258	9.75291e-06
Ssr4	6.926e-08	0.331232	0.408	0.299	0.00108053
Gm9843	4.16723e-11	0.328085	0.479	0.333	6.50129e-07
Cdh11	2.56316e-10	0.32283	0.272	0.159	3.99879e-06
Gm7536	1.59154e-06	0.320412	0.294	0.207	0.0248297
Myl12a	3.57163e-14	0.32002	0.726	0.546	5.57211e-10
Prkcdbp	3.36448e-10	0.318867	0.408	0.277	5.24893e-06
Btg1	5.49745e-09	0.318462	0.404	0.282	8.57657e-05
Snhg18	7.3027e-10	0.317084	0.346	0.223	1.13929e-05
Pdia6	7.12693e-11	0.312726	0.534	0.388	1.11187e-06
Gm10275	1.29283e-05	0.31254	0.27	0.198	0.201695
Aldoa	3.80817e-10	0.312277	0.471	0.335	5.94112e-06
Rps18	1.61527e-24	0.311997	0.937	0.797	2.51999e-20
Tmsb10	5.96544e-33	0.311971	0.991	0.91	9.30668e-29
mt-Nd5	9.57583e-12	0.311956	0.65	0.506	1.49393e-07
Rps13-ps2	1.61107e-06	0.31122	0.33	0.242	0.0251343
Rhoc	4.27202e-08	0.309382	0.331	0.226	0.000666478
Arf4	6.3165e-11	0.307865	0.533	0.377	9.85436e-07
Eln	7.55571e-10	0.305415	0.331	0.211	1.17877e-05
Tubb6	4.28531e-08	0.305159	0.326	0.221	0.000668551
Pdia3	2.65003e-11	0.303627	0.544	0.387	4.13431e-07
Spcs1	1.33355e-07	0.303	0.443	0.336	0.00208048
Ccl7	4.17334e-27	0.300557	0.594	0.335	6.51083e-23
Gm4149	6.2314e-07	0.298901	0.393	0.297	0.0097216
Gapdh	1.01303e-12	0.298783	0.639	0.453	1.58043e-08
Col5a2	7.71071e-09	0.297871	0.345	0.226	0.000120295
Cstb	5.36243e-09	0.296199	0.501	0.372	8.36593e-05
Sgk1	9.41704e-10	0.295011	0.471	0.324	1.46915e-05
Anxa6	1.40657e-05	0.293092	0.296	0.219	0.219439
Dusp1	1.17333e-09	0.291757	0.698	0.568	1.83052e-05
Lmna	8.53167e-06	0.290112	0.348	0.261	0.133103
Tpt1-ps3	4.91616e-07	0.289634	0.354	0.258	0.00766971
Tmem167	0.000256321	0.289309	0.255	0.196	1
Col15a1	4.22933e-08	0.288334	0.313	0.207	0.000659817
S100a16	6.77711e-08	0.287317	0.313	0.21	0.0010573
Cyb5a	4.08484e-11	0.286271	0.531	0.373	6.37277e-07
Gm8430	3.55871e-06	0.284008	0.356	0.266	0.0555195
Igfbp5	2.93564e-09	0.282813	0.32	0.203	4.5799e-05
Rpn1	1.38788e-05	0.281782	0.274	0.202	0.216523
Atp6v0d1	1.41085e-07	0.279027	0.305	0.204	0.00220106
Rrbp1	8.7436e-07	0.275123	0.43	0.331	0.0136409
Rpn2	1.57536e-05	0.272136	0.302	0.225	0.245772
Dbi	4.68017e-09	0.267825	0.516	0.369	7.30154e-05
Pttg1ip	1.18343e-09	0.266605	0.317	0.199	1.84627e-05
Rpl10	3.40198e-17	0.266149	0.909	0.787	5.30743e-13
Arl1	0.000212566	0.262837	0.259	0.195	1
Rpl13a	0.000527203	0.26245	0.302	0.244	1
Plod1	5.86444e-06	0.261234	0.281	0.197	0.0914911
Xbp1	3.6663e-06	0.260823	0.346	0.254	0.057198
Nedd4	2.73346e-09	0.260641	0.467	0.334	4.26448e-05
Selenof	3.56881e-09	0.259182	0.54	0.407	5.5677e-05
Ech1	2.00359e-07	0.257509	0.3	0.199	0.0031258
Ssr2	4.17666e-06	0.256997	0.415	0.317	0.0651601
Bcap31	0.000133174	0.250015	0.309	0.24	1
Ndufb6	0.00127234	-0.252175	0.19	0.254	1
Ube2b	0.0280613	-0.253563	0.229	0.267	1
Cox8a	0.00096099	-0.257797	0.505	0.524	1
Rpl30	1.89826e-05	-0.259507	0.655	0.688	0.296147
Rpl26	7.64159e-09	-0.261247	0.816	0.835	0.000119217
H3f3a	0.00444647	-0.268732	0.302	0.353	1
Cox6b1	6.62637e-05	-0.270051	0.518	0.566	1
Cfl1	6.21172e-07	-0.272274	0.732	0.741	0.00969091
Rps27	1.45552e-12	-0.273723	0.957	0.971	2.27075e-08
Usmg5	0.00187482	-0.28156	0.402	0.445	1
Ndufa5	0.0105319	-0.284842	0.261	0.301	1
Psma7	0.00851471	-0.287663	0.339	0.375	1
Ndufb8	0.00143168	-0.290799	0.194	0.252	1
Smdt1	0.000978751	-0.292295	0.259	0.319	1
Chchd2	5.80236e-05	-0.292651	0.508	0.539	0.905227
Rps29	1.84311e-16	-0.294455	0.939	0.948	2.87543e-12
Snrpg	8.39779e-05	-0.299436	0.326	0.399	1
Atp5k	0.00152797	-0.299656	0.333	0.382	1
Igha	3.09812e-26	-0.301666	0.607	0.37	4.83338e-22
Tagln2	0.00780344	-0.303844	0.298	0.333	1
Sem1	0.000113643	-0.305003	0.363	0.429	1
Marcksl1	0.0103205	-0.30656	0.246	0.286	1
Cox6c	0.00113408	-0.308347	0.624	0.632	1
Ldha	0.00378863	-0.310221	0.315	0.355	1
Nfkbia	0.00631185	-0.31064	0.561	0.564	1
Rps13	5.72075e-10	-0.323798	0.626	0.688	8.92494e-06
Rpl22	1.70767e-05	-0.327071	0.529	0.573	0.266413
2010107E04Rik	0.000412262	-0.334994	0.302	0.359	1
H3f3b	1.24402e-12	-0.337368	0.797	0.834	1.9408e-08
Lsp1	0.0197594	-0.343379	0.529	0.531	1
H2afz	0.00593956	-0.347033	0.337	0.371	1
Junb	1.82203e-05	-0.349376	0.462	0.526	0.284254
Serinc3	0.0122559	-0.349881	0.235	0.275	1
Clta	4.58104e-06	-0.350065	0.218	0.308	0.0714689
Arpc2	2.14251e-05	-0.353197	0.361	0.435	0.334253
Atox1	6.74557e-05	-0.353918	0.311	0.39	1
Tomm7	6.15557e-05	-0.3545	0.216	0.294	0.960331
Cox5a	0.000253066	-0.361196	0.328	0.379	1
Ctsz	0.00330008	-0.388873	0.231	0.277	1
Sdcbp	1.91949e-05	-0.397522	0.253	0.334	0.299459
Rps21	2.43549e-12	-0.398617	0.652	0.728	3.79961e-08
Rpl11	2.55406e-14	-0.398677	0.706	0.776	3.98458e-10
Actb	1.65596e-13	-0.407722	0.704	0.763	2.58347e-09
Atp5j	5.75399e-08	-0.409714	0.395	0.48	0.00089768
Eif5	3.38592e-07	-0.412845	0.251	0.354	0.00528237
Gnai2	1.66839e-05	-0.426368	0.248	0.328	0.260286
Atp6v1f	1.15709e-06	-0.443143	0.248	0.339	0.0180517
Cyba	3.42563e-05	-0.452091	0.298	0.365	0.534432
Ptms	1.57e-05	-0.462985	0.251	0.324	0.244935
Fth1	5.72915e-14	-0.474399	0.963	0.961	8.93805e-10
Sat1	4.67086e-07	-0.474741	0.248	0.344	0.00728701
Psap	0.000202425	-0.478888	0.387	0.436	1
Zfp36	4.61299e-05	-0.481792	0.415	0.468	0.719673
Slc25a5	2.7439e-10	-0.483815	0.436	0.519	4.28076e-06
Ly6a	5.41045e-06	-0.489282	0.225	0.309	0.0844084
Jchain	1.65142e-10	-0.489514	0.274	0.168	2.57638e-06
Thbs1	0.000105314	-0.498395	0.255	0.328	1
Sh3bgrl3	3.15519e-07	-0.501469	0.268	0.362	0.00492241
Rpl38	3.13624e-23	-0.502228	0.691	0.783	4.89286e-19
Calm1	1.9888e-14	-0.504185	0.641	0.71	3.10272e-10
Sub1	1.07285e-09	-0.505823	0.333	0.449	1.67376e-05
Npc2	4.02345e-09	-0.517028	0.428	0.513	6.27698e-05
Grn	1.45323e-05	-0.526971	0.186	0.259	0.226718
Ctla2a	1.29329e-07	-0.567379	0.406	0.493	0.00201767
Mif	3.6608e-11	-0.569326	0.432	0.525	5.71121e-07
Ifitm3	4.44593e-18	-0.576052	0.709	0.78	6.93609e-14
Ctsl	3.879e-13	-0.577089	0.531	0.627	6.05163e-09
Hes1	9.45398e-05	-0.580636	0.415	0.464	1
Ptma	1.71247e-28	-0.582679	0.641	0.765	2.67163e-24
Cd9	2.42029e-12	-0.632328	0.21	0.345	3.7759e-08
Ifi27l2a	8.06801e-07	-0.640838	0.274	0.354	0.0125869
Gadd45b	2.04852e-10	-0.661035	0.136	0.258	3.1959e-06
Id2	8.44047e-09	-0.672304	0.151	0.256	0.00013168
Fxyd5	5.77101e-11	-0.673565	0.156	0.283	9.00336e-07
Arpc3	3.96418e-17	-0.682585	0.236	0.408	6.18452e-13
Mt1	5.19234e-11	-0.687383	0.302	0.42	8.10057e-07
Ctsd	4.34215e-11	-0.744578	0.266	0.389	6.77419e-07
Mdk	1.88768e-07	-0.755077	0.291	0.362	0.00294497
Mmp14	1.58094e-07	-0.832714	0.438	0.483	0.00246643
Mmp2	1.06762e-09	-0.84782	0.27	0.366	1.66559e-05
Sox4	2.83932e-11	-0.853259	0.22	0.337	4.42962e-07
H2-D1	9.7776e-29	-0.861395	0.41	0.6	1.5254e-24
H2-K1	1.65912e-27	-0.896338	0.378	0.572	2.58839e-23
Rbp1	2.6317e-17	-0.897261	0.149	0.313	4.10572e-13
Retnlg	1.7315e-07	-0.905499	0.169	0.259	0.00270132
mt-Rnr2	1.69106e-32	-0.932645	0.821	0.912	2.63822e-28
B2m	7.55744e-63	-0.950702	0.767	0.9	1.17904e-58
Fcer1g	8.12607e-10	-0.969554	0.181	0.285	1.26775e-05
Nbl1	1.13714e-12	-0.988086	0.35	0.447	1.77406e-08
Tmsb4x	5.02646e-107	-0.999459	0.974	0.991	7.84178e-103
Selenop	1.79713e-15	-1.00667	0.263	0.403	2.8037e-11
Cst3	3.42272e-25	-1.01472	0.482	0.636	5.33978e-21
Ier3	1.71127e-18	-1.03883	0.236	0.411	2.66975e-14
Gpx3	1.74274e-26	-1.19396	0.611	0.726	2.71885e-22
Ly6e	5.80165e-36	-1.19973	0.233	0.488	9.05116e-32
Tyrobp	5.24592e-20	-1.25419	0.11	0.282	8.18415e-16
mt-Rnr1	6.41114e-45	-1.26465	0.343	0.61	1.0002e-40
Tmem176b	1.7962e-31	-1.28452	0.076	0.313	2.80225e-27
Pltp	1.23469e-23	-1.28789	0.069	0.256	1.92625e-19
Sparcl1	5.98693e-45	-1.56289	0.145	0.446	9.34021e-41
H2-Ab1	0.0070424	-1.65427	0.302	0.331	1
Mmp11	1.42602e-23	-1.68298	0.073	0.257	2.22474e-19
Lyz2	5.22083e-09	-1.78866	0.244	0.34	8.14502e-05
Apoe	3.14999e-46	-1.8516	0.447	0.681	4.9143e-42
Chchd10	3.05863e-40	-1.9699	0.043	0.316	4.77177e-36
Cd74	3.40785e-07	-2.35106	0.27	0.351	0.00531659
Mgp	4.44134e-90	-3.45121	0.088	0.556	6.92894e-86
Ccl2	0.116385	-0.433012	0.257	0.273	1
Crip1	0.180141	-0.386487	0.479	0.475	1
Timp2	0.237905	-0.253155	0.385	0.381	1
Lgals3	0.813522	-0.433093	0.345	0.329	1
Mylk	0.857469	-0.378965	0.3	0.282	1
Hspb1	0.885331	-0.461621	0.317	0.301	1

## Sheet: 1 p_stromal1_Mgp_high
Table S2: Representative genes of each cell cluster
	p_val	avg_logFC	pct.1	pct.2	p_val_adj
Mgp	0	2.60823	0.994	0.404	0
Inmt	3.92262e-132	1.98129	0.393	0.058	6.11969e-128
C1qtnf3	2.74893e-196	1.98052	0.495	0.056	4.28861e-192
Cxcl12	2.36061e-140	1.91742	0.579	0.157	3.68278e-136
Igfbp3	1.72747e-171	1.90827	0.323	0.016	2.69502e-167
Mmp11	1.93316e-194	1.79358	0.699	0.152	3.01592e-190
Gpx3	2.27551e-204	1.65074	0.967	0.667	3.55002e-200
Mmp2	3.78107e-148	1.56828	0.737	0.288	5.89884e-144
Mmp14	5.76143e-180	1.56307	0.87	0.41	8.9884e-176
Sparcl1	4.55049e-178	1.4789	0.855	0.328	7.09922e-174
Ms4a4d	6.51171e-71	1.43372	0.332	0.084	1.01589e-66
Prelp	1.12159e-95	1.43049	0.271	0.034	1.7498e-91
Aebp1	4.91779e-185	1.40962	0.929	0.577	7.67225e-181
Nbl1	3.78441e-152	1.38396	0.829	0.366	5.90406e-148
Rbp1	2.31149e-117	1.37104	0.64	0.23	3.60616e-113
Serping1	3.39761e-99	1.36948	0.655	0.316	5.30061e-95
Pamr1	3.19675e-91	1.33835	0.289	0.041	4.98725e-87
Mdk	3.12732e-133	1.32108	0.742	0.286	4.87893e-129
Gas1	2.61526e-66	1.29164	0.319	0.078	4.08006e-62
Sox4	1.43783e-89	1.26129	0.633	0.268	2.24315e-85
Htra3	3.90923e-47	1.24637	0.44	0.216	6.09879e-43
Cpe	2.02135e-48	1.19428	0.338	0.114	3.15351e-44
Ctsl	1.80325e-125	1.17203	0.855	0.572	2.81326e-121
Angptl2	3.17788e-45	1.14208	0.319	0.11	4.95781e-41
Dpt	5.59426e-77	1.12706	0.673	0.391	8.7276e-73
Mfap2	8.20897e-55	1.12587	0.492	0.237	1.28068e-50
Timp2	1.61698e-70	1.12103	0.622	0.341	2.52264e-66
Txnip	1.61824e-45	1.07614	0.364	0.136	2.52462e-41
Cdkn1c	7.09818e-51	1.04575	0.325	0.099	1.10739e-46
Fbln1	1.92311e-23	1.00798	0.291	0.147	3.00024e-19
Matn2	5.54877e-34	0.971893	0.388	0.2	8.65664e-30
Tcf21	3.93017e-23	0.962399	0.319	0.169	6.13146e-19
Ctla2a	3.15915e-25	0.938866	0.592	0.462	4.92858e-21
Dcn	6.47742e-122	0.919136	0.987	0.765	1.01054e-117
Cmtm3	7.02361e-27	0.916556	0.365	0.201	1.09575e-22
Rarres2	1.62838e-41	0.893217	0.609	0.423	2.54044e-37
Marcks	1.49763e-27	0.891844	0.362	0.188	2.33645e-23
Bgn	3.83379e-14	0.877271	0.345	0.243	5.9811e-10
Zfas1	1.72869e-18	0.792467	0.388	0.26	2.69693e-14
Ypel3	1.43291e-19	0.789679	0.267	0.133	2.23548e-15
Oxct1	6.02498e-13	0.789441	0.282	0.182	9.39957e-09
Ctsk	3.44614e-12	0.776489	0.275	0.182	5.37632e-08
Chchd10	1.34587e-60	0.774622	0.562	0.229	2.09969e-56
Maf	5.1762e-22	0.770906	0.484	0.357	8.0754e-18
Fxyd1	7.17943e-15	0.768972	0.33	0.222	1.12006e-10
Rnase4	5.32097e-61	0.767505	0.761	0.529	8.30125e-57
Mfap4	3.01301e-12	0.750501	0.404	0.326	4.7006e-08
Npc2	1.82276e-39	0.737814	0.647	0.477	2.84368e-35
Scpep1	2.11038e-10	0.735141	0.323	0.246	3.2924e-06
Selenop	9.48983e-58	0.719734	0.631	0.341	1.48051e-53
2410006H16Rik	5.29073e-13	0.684779	0.365	0.27	8.25407e-09
Vat1	5.52412e-07	0.653762	0.262	0.2	0.00861817
C1s1	1.26082e-06	0.643173	0.262	0.205	0.01967
Gstm1	2.44478e-10	0.639296	0.354	0.277	3.8141e-06
Gsn	2.11809e-34	0.637921	0.727	0.557	3.30443e-30
1810058I24Rik	6.96787e-09	0.631816	0.267	0.188	0.000108706
Ctnnb1	1.60604e-06	0.61475	0.26	0.2	0.0250559
Lum	8.06653e-31	0.612952	0.666	0.484	1.25846e-26
Adamts2	5.84834e-07	0.603194	0.301	0.245	0.00912399
mt-Rnr1	1.16435e-46	0.601184	0.766	0.539	1.8165e-42
Snhg18	2.44674e-08	0.589808	0.302	0.23	0.000381715
Pltp	3.55774e-21	0.585078	0.377	0.204	5.55042e-17
Cnpy2	1.58663e-06	0.565458	0.325	0.274	0.0247531
mt-Rnr2	6.07097e-75	0.557119	0.989	0.884	9.47132e-71
Cst3	1.45561e-51	0.555681	0.766	0.588	2.2709e-47
Myl9	2.64073e-10	0.533687	0.416	0.345	4.11981e-06
Mif	5.94655e-18	0.519117	0.575	0.501	9.2772e-14
Col1a2	4.60464e-44	0.512186	0.928	0.668	7.1837e-40
Lsp1	2.13967e-17	0.479003	0.603	0.518	3.33809e-13
Map1lc3b	7.13968e-12	0.478386	0.516	0.472	1.11386e-07
Uqcrh	8.23231e-13	0.459406	0.547	0.5	1.28432e-08
Hes1	1.57095e-18	0.456272	0.577	0.437	2.45084e-14
Adh1	6.68167e-25	0.438513	0.607	0.433	1.04241e-20
Gnas	7.29373e-13	0.413175	0.61	0.579	1.1379e-08
Prss23	4.90175e-11	0.407304	0.584	0.478	7.64722e-07
Cd63	8.39063e-22	0.338359	0.892	0.806	1.30902e-17
Rpl11	9.79266e-15	0.319484	0.777	0.764	1.52775e-10
Rps27	1.37439e-31	0.310676	0.968	0.969	2.14418e-27
Rps21	5.77568e-13	0.305871	0.72	0.717	9.01064e-09
Ptma	1.20301e-12	0.296598	0.763	0.744	1.87681e-08
Rab11a	3.78132e-10	-0.250746	0.111	0.253	5.89924e-06
Pkm	8.88839e-12	-0.251279	0.152	0.331	1.38668e-07
Prkcdbp	1.24804e-10	-0.251835	0.154	0.32	1.94707e-06
Spcs2	1.12462e-11	-0.252562	0.104	0.257	1.75452e-07
Rps18	4.20061e-13	-0.255872	0.688	0.838	6.55338e-09
Rplp0	1.8397e-16	-0.263176	0.748	0.872	2.87011e-12
Tra2b	1.67588e-11	-0.26337	0.117	0.274	2.61454e-07
Gdi2	1.89758e-12	-0.26497	0.132	0.305	2.96041e-08
Il6st	2.70832e-11	-0.267378	0.104	0.252	4.22525e-07
Hnrnpk	2.04367e-14	-0.274301	0.217	0.45	3.18833e-10
Ybx1	2.22084e-11	-0.275378	0.254	0.463	3.46474e-07
Rpl10	1.45978e-16	-0.278036	0.647	0.831	2.27741e-12
Ppp1ca	6.84858e-13	-0.281313	0.154	0.343	1.06845e-08
Prdx1	5.98378e-12	-0.283198	0.377	0.609	9.33529e-08
Aldoa	8.04664e-14	-0.284968	0.178	0.384	1.25536e-09
Myl12a	5.11828e-12	-0.288016	0.371	0.606	7.98503e-08
Gm4149	3.02284e-15	-0.290808	0.137	0.34	4.71594e-11
Pnrc1	3.06246e-13	-0.291079	0.2	0.407	4.77774e-09
Rpl3	4.41373e-15	-0.29471	0.588	0.799	6.88585e-11
Erh	1.79941e-12	-0.295936	0.115	0.28	2.80725e-08
Cfl1	8.19192e-15	-0.297421	0.51	0.778	1.27802e-10
Rhob	4.61226e-10	-0.298477	0.148	0.299	7.19559e-06
Rnh1	5.67388e-12	-0.299147	0.126	0.289	8.85182e-08
Reep5	5.72296e-14	-0.302559	0.106	0.279	8.92839e-10
Ddost	7.48809e-14	-0.303433	0.128	0.314	1.16822e-09
Gpx4	5.00503e-13	-0.30433	0.158	0.347	7.80835e-09
Cox5b	3.94169e-15	-0.30884	0.195	0.423	6.14943e-11
Mdh2	2.2727e-12	-0.31194	0.096	0.251	3.54565e-08
Hsp90aa1	7.16115e-13	-0.315479	0.312	0.545	1.11721e-08
Tcf4	9.30558e-10	-0.315591	0.128	0.269	1.45176e-05
Rpl4	5.19533e-19	-0.316065	0.61	0.818	8.10523e-15
Plac8	8.19846e-09	-0.319408	0.184	0.331	0.000127904
Tmem258	3.69691e-17	-0.319694	0.219	0.475	5.76756e-13
Xbp1	9.04382e-13	-0.323844	0.122	0.291	1.41093e-08
Adamts1	8.70419e-10	-0.329811	0.169	0.318	1.35794e-05
Mir703	6.80671e-13	-0.330124	0.128	0.3	1.06192e-08
Hsp90ab1	1.04173e-15	-0.330543	0.429	0.699	1.6252e-11
Rcn3	2.21119e-13	-0.331739	0.199	0.402	3.44968e-09
Nr4a1	1.05917e-12	-0.345374	0.134	0.306	1.65242e-08
Emp3	3.53083e-14	-0.345775	0.147	0.339	5.50845e-10
Serpinh1	2.31387e-07	-0.345936	0.571	0.629	0.00360987
Tmed2	1.10062e-16	-0.346245	0.104	0.297	1.71708e-12
Rab1a	2.596e-15	-0.346436	0.121	0.313	4.05002e-11
Snx3	9.40994e-15	-0.347618	0.111	0.295	1.46805e-10
Arf4	5.20703e-15	-0.349832	0.204	0.432	8.12349e-11
Anxa5	1.35283e-14	-0.35619	0.314	0.555	2.11055e-10
Htra1	5.67821e-10	-0.358976	0.273	0.445	8.85857e-06
Rpl13a	7.28515e-16	-0.361134	0.096	0.279	1.13656e-11
Rpl36al	2.06757e-18	-0.361957	0.199	0.455	3.22562e-14
Eif2s2	2.53104e-17	-0.362888	0.221	0.474	3.94868e-13
Sdcbp	6.48143e-13	-0.364744	0.165	0.349	1.01117e-08
Shisa5	2.56278e-10	-0.366106	0.121	0.262	3.9982e-06
Arf1	8.25701e-18	-0.367995	0.154	0.382	1.28818e-13
Ube2d3	4.44216e-14	-0.36809	0.213	0.429	6.93022e-10
Cyba	2.85543e-12	-0.369373	0.195	0.383	4.45475e-08
Cct8	6.66293e-17	-0.373644	0.074	0.252	1.03948e-12
Hspa1b	6.24751e-12	-0.374626	0.13	0.283	9.74674e-08
Tubb5	6.67615e-16	-0.376619	0.154	0.362	1.04155e-11
Thbs1	1.93506e-06	-0.376684	0.215	0.335	0.0301889
Gm9385	2.69813e-16	-0.379306	0.08	0.257	4.20935e-12
P4hb	6.90266e-16	-0.379411	0.256	0.493	1.07688e-11
Srsf3	8.94991e-15	-0.379951	0.108	0.285	1.39628e-10
Igfbp6	9.87258e-14	-0.380498	0.304	0.519	1.54022e-09
Bcap31	8.84371e-18	-0.383583	0.085	0.277	1.37971e-13
Sub1	2.45257e-12	-0.384932	0.252	0.463	3.82625e-08
Atp5b	6.12145e-18	-0.393008	0.206	0.455	9.55008e-14
Litaf	3.0951e-15	-0.396185	0.161	0.367	4.82866e-11
Rpn2	7.83704e-17	-0.399968	0.082	0.262	1.22266e-12
Phlda1	3.53524e-10	-0.403147	0.249	0.423	5.51533e-06
Snrpb	4.90288e-20	-0.405535	0.137	0.376	7.64898e-16
Tpm3	6.16086e-14	-0.405895	0.093	0.254	9.61156e-10
Tpm4	9.56417e-20	-0.406185	0.176	0.426	1.49211e-15
Hspe1	6.74124e-15	-0.407699	0.223	0.442	1.0517e-10
Cope	7.58269e-18	-0.407728	0.091	0.286	1.18298e-13
Slc25a5	6.54212e-21	-0.409599	0.269	0.547	1.02064e-16
Tuba1a	8.9556e-15	-0.413182	0.262	0.474	1.39716e-10
Sqstm1	8.26061e-16	-0.416312	0.293	0.536	1.28874e-11
Serinc3	3.0354e-14	-0.424053	0.121	0.294	4.73553e-10
1810037I17Rik	1.94175e-14	-0.425361	0.096	0.264	3.02933e-10
Sat1	4.48388e-13	-0.427272	0.173	0.357	6.9953e-09
Btg2	3.12072e-17	-0.431627	0.145	0.355	4.86863e-13
Eif4a2	6.05172e-18	-0.433636	0.083	0.273	9.44129e-14
Ccl6	1.24722e-08	-0.433895	0.128	0.255	0.000194579
Sec61b	8.17802e-20	-0.435583	0.265	0.537	1.27585e-15
Sap18	2.51912e-18	-0.43617	0.072	0.259	3.93008e-14
Arpc5	5.94488e-16	-0.4383	0.089	0.264	9.27461e-12
Actr3	2.85901e-16	-0.440107	0.089	0.268	4.46033e-12
Calm1	1.59109e-18	-0.440281	0.481	0.737	2.48226e-14
Gm15536	8.54589e-21	-0.443688	0.204	0.472	1.33324e-16
Prkar1a	1.65738e-18	-0.444781	0.122	0.337	2.58567e-14
Txn1	2.94138e-21	-0.448111	0.158	0.41	4.58885e-17
Gnb2	5.0239e-19	-0.456209	0.096	0.3	7.83779e-15
Calu	5.4794e-18	-0.456256	0.1	0.299	8.54841e-14
Psmb2	1.09728e-17	-0.457888	0.102	0.298	1.71187e-13
Selenos	8.70336e-21	-0.460005	0.074	0.28	1.35781e-16
Rps16-ps2	6.93125e-21	-0.460047	0.254	0.535	1.08134e-16
Junb	1.22472e-15	-0.461561	0.317	0.551	1.91068e-11
Sar1a	1.48483e-21	-0.466026	0.076	0.289	2.31648e-17
Myl6	3.10601e-24	-0.466676	0.377	0.684	4.84568e-20
Clic1	4.63202e-22	-0.474819	0.197	0.467	7.22641e-18
Cotl1	1.14758e-14	-0.48447	0.095	0.259	1.79033e-10
Atp5g1	6.72582e-19	-0.485117	0.139	0.361	1.04929e-14
Arpc2	8.05242e-20	-0.486281	0.204	0.462	1.25626e-15
Ccnl1	1.85644e-17	-0.489159	0.102	0.296	2.89623e-13
Rpl39-ps	2.12692e-19	-0.493725	0.069	0.26	3.3182e-15
Cd164	2.54954e-19	-0.493893	0.197	0.435	3.97753e-15
Gm15500	6.11796e-20	-0.493926	0.071	0.267	9.54463e-16
Surf4	4.76953e-20	-0.493995	0.1	0.314	7.44094e-16
Zfand5	1.90722e-21	-0.497667	0.109	0.34	2.97545e-17
Rpl7a	2.01555e-23	-0.505841	0.219	0.504	3.14446e-19
Prdx5	6.33913e-19	-0.508904	0.102	0.305	9.88968e-15
Ssr3	4.76271e-20	-0.513807	0.089	0.296	7.43031e-16
Hspa1a	1.9802e-13	-0.514556	0.406	0.591	3.08931e-09
Arpc1b	5.20275e-22	-0.514657	0.228	0.502	8.11681e-18
Fn1	2.7461e-20	-0.51668	0.128	0.352	4.2842e-16
mt-Nd3	4.14748e-22	-0.51883	0.117	0.354	6.47049e-18
Ly6e	1.28493e-12	-0.519308	0.288	0.479	2.00462e-08
H2-K1	2.11906e-19	-0.526467	0.317	0.582	3.30595e-15
Nme1	1.75353e-21	-0.526954	0.089	0.304	2.73567e-17
Slc3a2	1.25977e-23	-0.535119	0.128	0.38	1.96537e-19
Jun	1.28074e-20	-0.546132	0.365	0.604	1.99808e-16
Ost4	2.28035e-23	-0.546136	0.089	0.32	3.55757e-19
Dbi	1.84205e-22	-0.546391	0.169	0.427	2.87378e-18
Hnrnpf	1.02134e-21	-0.556248	0.056	0.253	1.5934e-17
Ppp1r15a	1.45166e-20	-0.559271	0.124	0.347	2.26474e-16
Ranbp1	1.11701e-20	-0.564909	0.067	0.264	1.74264e-16
Tspo	3.46011e-22	-0.565312	0.098	0.325	5.39812e-18
Cxcl10	1.82878e-17	-0.568375	0.095	0.278	2.85309e-13
Ssr4	5.29405e-26	-0.568674	0.096	0.351	8.25925e-22
Eif4e	2.85367e-20	-0.571082	0.069	0.263	4.45201e-16
Gm8430	1.35846e-24	-0.571552	0.08	0.312	2.11934e-20
Eif5a	1.16625e-28	-0.575332	0.221	0.533	1.81946e-24
mt-Co1	1.31745e-54	-0.581332	0.688	0.901	2.05536e-50
Eif4a1	3.51057e-27	-0.582139	0.184	0.479	5.47684e-23
Hnrnpa2b1	9.55238e-24	-0.584438	0.106	0.348	1.49027e-19
Eef1g	8.88509e-31	-0.592662	0.226	0.551	1.38616e-26
Zfp36	2.61672e-19	-0.593512	0.247	0.496	4.08235e-15
Rps11-ps1	1.00722e-21	-0.59549	0.067	0.27	1.57137e-17
Rpl10a-ps1	1.41674e-26	-0.604954	0.126	0.397	2.21026e-22
Rpl15	1.27762e-32	-0.606725	0.301	0.629	1.99321e-28
Gm9843	2.23577e-27	-0.606775	0.121	0.393	3.48802e-23
Tubb6	4.2224e-21	-0.617149	0.067	0.265	6.58737e-17
Dap	1.16334e-23	-0.622255	0.065	0.282	1.81492e-19
Mfap5	1.9703e-25	-0.625022	0.239	0.514	3.07386e-21
Cnbp	1.84923e-30	-0.625484	0.165	0.473	2.88498e-26
Tmbim6	2.64601e-26	-0.626514	0.1	0.355	4.12804e-22
Bst2	4.14492e-31	-0.629141	0.137	0.443	6.46649e-27
Col6a1	1.73753e-18	-0.640467	0.453	0.593	2.71072e-14
Ran	1.23724e-24	-0.645758	0.087	0.322	1.93022e-20
Tuba1b	1.93675e-23	-0.64667	0.096	0.325	3.02152e-19
S100a10	3.21352e-34	-0.654223	0.223	0.56	5.01342e-30
Serf2	1.22459e-32	-0.654356	0.262	0.587	1.91049e-28
Gm14586	2.89416e-26	-0.657571	0.085	0.33	4.51517e-22
Cycs	1.0228e-23	-0.658683	0.054	0.262	1.59567e-19
Ogn	2.66011e-25	-0.664007	0.163	0.422	4.15004e-21
Sh3bgrl3	5.78111e-25	-0.671344	0.132	0.385	9.0191e-21
Col5a1	1.64854e-24	-0.673494	0.082	0.309	2.57189e-20
Sec61g	1.78272e-30	-0.67556	0.132	0.428	2.78122e-26
Emp1	3.74592e-21	-0.675966	0.128	0.35	5.84401e-17
Cd34	8.63599e-25	-0.676383	0.186	0.442	1.3473e-20
Cstb	2.90977e-28	-0.677187	0.147	0.432	4.53954e-24
Rpl35	4.35063e-54	-0.678546	0.516	0.81	6.78742e-50
Hspa8	7.69126e-59	-0.682652	0.594	0.888	1.19991e-54
Tagln2	1.33206e-26	-0.686311	0.109	0.365	2.07815e-22
H2-D1	1.07949e-25	-0.688084	0.334	0.613	1.68411e-21
Serp1	2.88617e-29	-0.688276	0.098	0.367	4.50271e-25
Gm7808	3.58448e-30	-0.689926	0.085	0.357	5.59215e-26
Gm5586	1.41909e-28	-0.698827	0.056	0.297	2.21393e-24
Fos	3.61249e-33	-0.701743	0.484	0.74	5.63584e-29
Gm10288	6.61644e-27	-0.705907	0.061	0.293	1.03223e-22
Gm9794	8.22079e-31	-0.709828	0.08	0.352	1.28253e-26
Rpl28-ps1	3.35814e-27	-0.714694	0.048	0.275	5.23903e-23
Cyr61	6.62824e-19	-0.729234	0.28	0.483	1.03407e-14
Gm11361	1.95743e-35	-0.731235	0.224	0.565	3.05379e-31
Rpl10-ps3	1.58537e-32	-0.731754	0.098	0.388	2.47334e-28
Actg1	2.83834e-41	-0.741057	0.365	0.69	4.4281e-37
Ctsh	1.31968e-28	-0.74539	0.08	0.334	2.05883e-24
Vapa	8.32287e-29	-0.749324	0.056	0.297	1.29845e-24
Rpl34-ps1	5.46046e-27	-0.752045	0.039	0.256	8.51886e-23
Sgk1	9.2984e-24	-0.758736	0.141	0.38	1.45064e-19
Rps13-ps2	3.17021e-31	-0.760805	0.043	0.29	4.94584e-27
Gm11478	1.61134e-32	-0.768432	0.08	0.357	2.51384e-28
Rpl31-ps8	7.61654e-30	-0.778701	0.035	0.269	1.18826e-25
Wdr89	4.4485e-36	-0.794918	0.104	0.415	6.94011e-32
Igf1	1.07333e-27	-0.795893	0.111	0.369	1.6745e-23
Lmna	1.06602e-28	-0.796017	0.065	0.309	1.6631e-24
Tpt1-ps3	3.78153e-33	-0.802281	0.048	0.31	5.89956e-29
Gm10073	4.75799e-28	-0.80687	0.033	0.251	7.42294e-24
Tyrobp	6.75553e-14	-0.808216	0.126	0.279	1.05393e-09
Tgm2	1.17635e-23	-0.811314	0.065	0.275	1.83522e-19
Rps3a2	2.87318e-31	-0.819266	0.03	0.267	4.48245e-27
Btg1	5.70394e-32	-0.821736	0.071	0.338	8.89871e-28
H2afz	9.20349e-29	-0.825492	0.135	0.405	1.43584e-24
Sptssa	1.24071e-23	-0.834329	0.058	0.261	1.93563e-19
Spon1	5.95662e-28	-0.842014	0.061	0.296	9.29293e-24
Hspb1	5.23327e-09	-0.847569	0.187	0.323	8.16442e-05
Morf4l2	2.9343e-33	-0.858052	0.05	0.312	4.5778e-29
Gm2000	1.85853e-52	-0.862177	0.273	0.66	2.89949e-48
Gm6136	1.86632e-31	-0.883971	0.022	0.253	2.91164e-27
Fxyd5	1.4298e-27	-0.891143	0.065	0.298	2.23063e-23
Rps27rt	1.70353e-36	-0.896744	0.059	0.346	2.65768e-32
Gm13436	3.49865e-33	-0.898646	0.03	0.276	5.45824e-29
Ldha	9.51954e-37	-0.898832	0.091	0.392	1.48514e-32
Col6a4	1.45909e-28	-0.899378	0.202	0.452	2.27633e-24
Gadd45g	2.06903e-38	-0.899599	0.419	0.68	3.22789e-34
Ramp2	4.79106e-35	-0.917379	0.108	0.402	7.47454e-31
Gm14303	7.87024e-49	-0.917382	0.171	0.556	1.22784e-44
Col6a3	1.03143e-30	-0.918397	0.247	0.501	1.60913e-26
Klf4	1.6509e-35	-0.928167	0.117	0.416	2.57556e-31
Pfn1	2.0751e-50	-0.938862	0.195	0.585	3.23737e-46
Ifrd1	5.27475e-43	-0.940034	0.135	0.482	8.22914e-39
Gm5805	3.00666e-49	-0.943753	0.128	0.509	4.69069e-45
Raly	4.47053e-46	-0.94544	0.217	0.574	6.97447e-42
Eef1a1	1.19952e-72	-0.953449	0.438	0.789	1.87137e-68
Cd63-ps	1.65603e-38	-0.994278	0.109	0.42	2.58357e-34
Plk2	4.03342e-30	-0.994801	0.035	0.265	6.29254e-26
Vim	2.70723e-50	-1.00866	0.156	0.535	4.22354e-46
Crip1	4.75378e-39	-1.01782	0.187	0.523	7.41637e-35
Ppia	6.97401e-63	-1.02485	0.245	0.669	1.08802e-58
Ubc	4.88381e-83	-1.03394	0.51	0.84	7.61923e-79
Gm4366	4.85499e-37	-1.04246	0.017	0.273	7.57427e-33
Gm13588	2.69237e-37	-1.05074	0.022	0.285	4.20037e-33
Rps23-ps1	7.23702e-46	-1.05753	0.039	0.363	1.12905e-41
Dnajb1	2.1598e-42	-1.0579	0.093	0.425	3.3695e-38
Rps26-ps1	1.33983e-40	-1.0603	0.03	0.316	2.09027e-36
Gm12481	2.5935e-38	-1.06954	0.02	0.288	4.04611e-34
Rps6	5.89957e-68	-1.07698	0.199	0.646	9.20392e-64
Bhlhe40	1.04065e-37	-1.08287	0.03	0.302	1.62352e-33
Pim1	2.86287e-46	-1.08485	0.096	0.444	4.46637e-42
Rpl18-ps1	6.41812e-39	-1.09516	0.019	0.286	1.00129e-34
Gapdh	3.18141e-58	-1.09748	0.13	0.538	4.96331e-54
Fcer1g	9.06015e-26	-1.09925	0.08	0.302	1.41347e-21
Gm6204	9.78932e-39	-1.10502	0.002	0.255	1.52723e-34
Col6a2	4.36542e-47	-1.10666	0.393	0.647	6.8105e-43
Gng12	2.26841e-48	-1.12127	0.096	0.454	3.53894e-44
Gm10736	1.66766e-73	-1.12649	0.289	0.689	2.60172e-69
Ddit4l	2.09735e-36	-1.13653	0.045	0.315	3.27207e-32
Gm10076	1.04562e-57	-1.14184	0.111	0.514	1.63127e-53
Atf3	1.17404e-39	-1.1429	0.063	0.362	1.83161e-35
Anxa1	5.78158e-42	-1.1659	0.078	0.393	9.01984e-38
Rpl14-ps1	4.34709e-45	-1.16629	0.022	0.327	6.7819e-41
Srgn	2.40078e-59	-1.17237	0.2	0.619	3.74546e-55
Gm15427	4.21663e-73	-1.18764	0.26	0.676	6.57836e-69
Rpl37rt	5.86388e-55	-1.1993	0.059	0.435	9.14825e-51
Anxa3	2.02356e-45	-1.20223	0.02	0.326	3.15696e-41
Klf6	9.11684e-48	-1.20353	0.059	0.398	1.42232e-43
Fosb	5.61507e-52	-1.23362	0.134	0.502	8.76007e-48
Rps19-ps6	1.66699e-50	-1.23958	0.03	0.367	2.60068e-46
Nfkbia	1.2999e-63	-1.24944	0.208	0.623	2.02797e-59
Rpl3-ps1	2.90356e-53	-1.26911	0.037	0.39	4.52984e-49
Ackr3	2.53963e-37	-1.27339	0.011	0.264	3.96207e-33
Gm5905	5.28529e-56	-1.28641	0.03	0.393	8.24558e-52
Gm8730	6.08529e-51	-1.31536	0.011	0.337	9.49366e-47
Gm1821	6.99048e-66	-1.34378	0.087	0.514	1.09058e-61
Lgals3	1.96092e-40	-1.35959	0.071	0.375	3.05923e-36
Gm8797	8.22768e-65	-1.39747	0.078	0.494	1.2836e-60
Tnfaip6	1.31426e-38	-1.4079	0.013	0.274	2.05038e-34
Fbln2	1.10633e-46	-1.41095	0.059	0.384	1.72598e-42
Uba52	2.20995e-69	-1.43104	0.046	0.475	3.44774e-65
Errfi1	4.81187e-51	-1.48571	0.037	0.377	7.507e-47
Lyz2	6.64643e-11	-1.49681	0.195	0.349	1.03691e-06
Rps6-ps4	5.4175e-68	-1.57651	0.02	0.427	8.45184e-64
Anxa2	6.97979e-89	-1.59362	0.102	0.596	1.08892e-84
Ccl11	5.43564e-41	-1.66031	0.006	0.273	8.48014e-37
H2-Ab1	3.05046e-14	-1.67472	0.173	0.352	4.75902e-10
Aldh1a2	1.8761e-57	-1.7176	0.037	0.401	2.9269e-53
P2ry14	8.40766e-55	-1.80878	0.002	0.337	1.31168e-50
Ftl1-ps1	6.38456e-87	-1.83098	0.067	0.553	9.96055e-83
Ramp3	6.57319e-64	-1.85254	0.013	0.396	1.02548e-59
Hsd11b2	2.45777e-56	-1.89524	0.009	0.356	3.83436e-52
Ccl2	6.0341e-43	-1.95483	0.024	0.312	9.41381e-39
Igkc	2.88286e-81	-1.97911	0.095	0.578	4.49755e-77
Igha	3.35987e-67	-2.02957	0.043	0.464	5.24173e-63
Ccl7	1.09729e-67	-2.05295	0.024	0.43	1.71188e-63
Cd74	4.70141e-19	-2.36152	0.163	0.369	7.33468e-15
Marcksl1	6.31168e-06	0.462943	0.327	0.272	0.0984686
Mylk	1.53963e-05	0.286069	0.328	0.278	0.240198
Lamp2	1.96324e-05	0.533942	0.351	0.323	0.306286
Selenom	2.14093e-05	0.583195	0.284	0.243	0.334006
Nedd4	3.66384e-05	0.429828	0.377	0.349	0.571595
Ctsb	5.81619e-05	-0.321488	0.564	0.71	0.907384
Serpinf1	6.85078e-05	0.432178	0.356	0.33	1
Tmem176b	7.73612e-05	0.30097	0.33	0.27	1
Sec62	0.000131232	0.450354	0.427	0.438	1
Ier3	0.000182775	-0.453583	0.293	0.402	1
Gadd45b	0.000622328	0.335221	0.278	0.234	1
Mt1	0.000789551	0.273488	0.421	0.4	1
Cox7a2l	0.00175976	0.439192	0.334	0.331	1
Gabarapl1	0.00182116	0.510599	0.254	0.23	1
Malat1	0.00602762	0.363954	0.388	0.392	1
Gabarap	0.00642075	0.258007	0.512	0.564	1
Klf9	0.00746597	0.317647	0.312	0.293	1
Cald1	0.00862559	0.367416	0.323	0.318	1
Rsrp1	0.0137365	0.372186	0.256	0.238	1
Ptms	0.0423126	0.345506	0.31	0.314	1
Col4a1	0.0681965	0.267726	0.353	0.376	1
Lamp1	0.0716699	0.303026	0.349	0.38	1
Atpif1	0.0871843	0.29452	0.391	0.441	1
Cyb5a	0.120172	0.331629	0.36	0.402	1
Flna	0.159548	0.286353	0.293	0.312	1
Eif3f	0.1713	0.282778	0.301	0.322	1
Aprt	0.231792	0.315593	0.243	0.253	1
Lox	0.24253	0.356368	0.252	0.27	1
Cdk4	0.322788	0.34294	0.258	0.28	1
Olfml3	0.4307	0.252629	0.276	0.297	1
Tmem50a	0.556093	0.283015	0.297	0.339	1
Rabac1	0.576851	0.269371	0.263	0.295	1
Prdx2	0.63676	0.284189	0.297	0.349	1
Ndufa6	0.922356	0.27426	0.289	0.341	1

## Sheet: 3 p_stromal1_stroCxcl14_high
Table S2: Representative genes of each cell cluster
	p_val	avg_logFC	pct.1	pct.2	p_val_adj
Cxcl14	1.57371e-156	2.52933	0.449	0.058	2.45514e-152
Chchd10	1.08596e-226	2.05246	0.838	0.202	1.6942e-222
Nbl1	3.19383e-126	1.29678	0.836	0.379	4.9827e-122
Cdkn1c	8.86962e-53	1.25804	0.348	0.102	1.38375e-48
Mdk	4.09813e-101	1.23083	0.721	0.302	6.3935e-97
Hoxa10	5.90383e-48	1.22387	0.31	0.091	9.21057e-44
Mmp11	1.78501e-101	1.18804	0.62	0.178	2.78479e-97
Lsp1	4.24573e-89	1.14514	0.8	0.494	6.62377e-85
Osr2	1.0725e-37	1.10963	0.445	0.226	1.67321e-33
Igfbp4	1.91919e-38	1.07185	0.539	0.324	2.99412e-34
mt-Rnr2	3.77159e-131	1.06001	1	0.885	5.88406e-127
Cox6c	1.08756e-72	1.03714	0.791	0.61	1.69671e-68
Sox4	5.45918e-53	1.01014	0.584	0.285	8.51686e-49
Mmp14	6.89046e-76	0.939878	0.775	0.436	1.07498e-71
Zbtb20	2.0877e-19	0.930139	0.366	0.225	3.25702e-15
Mif	4.28427e-52	0.91765	0.706	0.485	6.68389e-48
Cfh	2.45403e-20	0.911603	0.297	0.149	3.82853e-16
Plac8	1.79155e-30	0.901943	0.483	0.287	2.795e-26
Pltp	1.32809e-37	0.883189	0.447	0.2	2.07196e-33
Rnase4	6.38099e-35	0.870777	0.692	0.545	9.95498e-31
Mmp2	1.24837e-45	0.833891	0.6	0.319	1.94758e-41
Cpe	4.15506e-26	0.816685	0.306	0.124	6.48231e-22
Fn1	3.53217e-18	0.807012	0.431	0.305	5.51053e-14
Gpx3	2.48643e-66	0.787149	0.892	0.685	3.87907e-62
Mfap2	6.30755e-20	0.764593	0.413	0.255	9.8404e-16
Aprt	6.03213e-11	0.734485	0.333	0.241	9.41072e-07
Tsc22d1	5.58283e-22	0.71542	0.521	0.38	8.70977e-18
Nupr1	1.19853e-09	0.704828	0.38	0.303	1.86983e-05
Ndufb9	4.02046e-13	0.701569	0.425	0.337	6.27231e-09
Cmtm3	9.73772e-12	0.691662	0.319	0.212	1.51918e-07
Dio2	1.16417e-09	0.68575	0.265	0.174	1.81622e-05
Sparcl1	8.64849e-43	0.681847	0.67	0.368	1.34925e-38
Mylk	6.98068e-29	0.680996	0.461	0.261	1.08906e-24
Cdk4	1.11903e-09	0.665709	0.348	0.268	1.74581e-05
Cd63	7.77044e-69	0.66168	0.953	0.8	1.21227e-64
Igfbp7	2.22257e-60	0.656967	0.921	0.734	3.46743e-56
mt-Nd2	5.31959e-57	0.65	0.894	0.805	8.2991e-53
Hes1	3.7705e-17	0.644514	0.569	0.442	5.88236e-13
mt-Nd4	9.11063e-73	0.639766	0.955	0.905	1.42135e-68
mt-Rnr1	8.9496e-45	0.638608	0.789	0.542	1.39623e-40
Rbp1	4.62728e-18	0.628411	0.436	0.269	7.21901e-14
mt-Nd1	1.88991e-80	0.627706	0.971	0.924	2.94845e-76
Malat1	2.69943e-08	0.624116	0.44	0.384	0.000421138
Minos1	2.89376e-14	0.623341	0.539	0.49	4.51455e-10
Tmem256	3.02474e-07	0.578435	0.308	0.237	0.0047189
Ptms	9.36524e-09	0.566672	0.382	0.304	0.000146107
Cnpy2	4.46525e-08	0.557626	0.346	0.272	0.000696624
Marcks	1.43534e-06	0.555622	0.276	0.205	0.0223928
Rarres2	5.69795e-11	0.55214	0.501	0.443	8.88937e-07
Ctla2a	2.64718e-11	0.551315	0.562	0.469	4.12986e-07
mt-Cytb	6.0356e-80	0.517229	0.991	0.958	9.41614e-76
Rps21	1.64776e-31	0.497549	0.796	0.707	2.57068e-27
Timp2	3.42301e-09	0.488944	0.443	0.373	5.34024e-05
Ctsl	8.6979e-22	0.483763	0.699	0.601	1.35696e-17
Rpl38	2.57613e-30	0.458352	0.825	0.762	4.01902e-26
Myl9	1.23289e-07	0.452589	0.413	0.348	0.00192343
Tpt1	2.57107e-20	0.424795	0.791	0.778	4.01113e-16
Ptma	5.57518e-25	0.414192	0.809	0.739	8.69784e-21
Rps27l	8.75298e-08	0.412984	0.497	0.462	0.00136555
Id3	1.04039e-09	0.408614	0.434	0.329	1.62312e-05
Lgals1	4.59295e-26	0.379532	0.937	0.834	7.16546e-22
Npc2	5.04267e-07	0.364164	0.526	0.498	0.00786707
Rpl26	5.67559e-17	0.354844	0.818	0.834	8.85449e-13
Cox6b1	2.29399e-07	0.352638	0.557	0.559	0.00357885
Cox7c	8.29373e-09	0.348631	0.591	0.568	0.00012939
Rpl18	3.65503e-09	0.335463	0.685	0.709	5.70222e-05
Rplp1	2.78395e-18	0.329214	0.879	0.883	4.34325e-14
Rps26	2.3184e-19	0.310954	0.894	0.878	3.61693e-15
Cox4i1	5.33911e-08	0.306811	0.679	0.709	0.000832955
Actb	2.06682e-11	0.306688	0.76	0.754	3.22445e-07
Rpl11	4.60415e-11	0.299922	0.764	0.766	7.18293e-07
Rps27	1.18222e-30	0.298958	0.982	0.967	1.84438e-26
Rpl30	8.50448e-08	0.294231	0.658	0.687	0.00132678
Rps28	2.85339e-10	0.292309	0.834	0.836	4.45158e-06
Rps17	2.02064e-08	0.283767	0.667	0.689	0.00031524
Rpl39	4.83075e-07	0.2824	0.638	0.667	0.00753645
B2m	3.91006e-21	0.282055	0.912	0.877	6.10009e-17
Rpl34	3.94367e-07	0.255515	0.717	0.771	0.00615253
Pdia3	5.60827e-10	-0.250739	0.225	0.434	8.74947e-06
Myl12b	2.46058e-09	-0.2518	0.108	0.255	3.83876e-05
Gm15536	7.67629e-09	-0.253053	0.254	0.458	0.000119758
Eif1	2.4388e-10	-0.261252	0.613	0.814	3.80476e-06
Prdx1	3.15158e-08	-0.264226	0.38	0.602	0.000491679
Txn1	9.41751e-10	-0.264802	0.202	0.397	1.46923e-05
Jund	6.85875e-12	-0.268603	0.216	0.437	1.07003e-07
Hspa8	1.20168e-10	-0.268839	0.721	0.863	1.87475e-06
Pdia6	3.2801e-11	-0.276255	0.218	0.435	5.11728e-07
Ssr3	4.28111e-12	-0.276989	0.108	0.287	6.67895e-08
Rps11-ps1	1.0844e-10	-0.282209	0.101	0.259	1.69178e-06
Reep5	5.37556e-10	-0.285002	0.117	0.273	8.3864e-06
Pabpc1	3.89767e-10	-0.291823	0.398	0.624	6.08075e-06
H3f3b	1.43457e-09	-0.294082	0.706	0.846	2.23807e-05
Hnrnpa2b1	1.60275e-10	-0.299809	0.153	0.334	2.50045e-06
Eif4a2	2.46298e-11	-0.302209	0.101	0.265	3.8425e-07
Dap	6.63961e-12	-0.30294	0.101	0.271	1.03585e-07
Cyb5a	1.76231e-10	-0.303484	0.216	0.42	2.74937e-06
Eif4a1	1.76923e-10	-0.305049	0.252	0.462	2.76018e-06
Calm2	3.83966e-12	-0.307155	0.265	0.503	5.99025e-08
Clic1	1.73144e-11	-0.309813	0.236	0.454	2.70122e-07
Ramp2	3.59903e-09	-0.310535	0.207	0.38	5.61485e-05
Calu	3.93407e-11	-0.315644	0.119	0.291	6.13754e-07
Xbp1	1.68907e-09	-0.316295	0.13	0.285	2.63512e-05
Id2	1.33272e-06	-0.317223	0.139	0.255	0.0207918
Aldoa	2.4192e-12	-0.318766	0.171	0.379	3.7742e-08
Arf1	7.25716e-13	-0.320413	0.162	0.375	1.13219e-08
Atf4	7.62855e-12	-0.321299	0.173	0.377	1.19013e-07
Cyba	1.08402e-08	-0.322619	0.207	0.376	0.000169118
Slc3a2	9.87077e-12	-0.322677	0.169	0.368	1.53994e-07
Dbi	6.6033e-12	-0.3267	0.202	0.415	1.03018e-07
Rab1a	6.08842e-14	-0.330034	0.112	0.309	9.49855e-10
Shisa5	7.34624e-08	-0.336402	0.126	0.257	0.00114609
Spcs2	1.59361e-13	-0.337147	0.081	0.256	2.48619e-09
Il6st	4.05558e-13	-0.338762	0.081	0.251	6.3271e-09
Adamts2	6.06213e-11	-0.3439	0.11	0.272	9.45753e-07
Arpc5	3.88625e-12	-0.344557	0.092	0.259	6.06293e-08
Tmbim6	1.68187e-14	-0.345913	0.13	0.344	2.62389e-10
mt-Nd3	8.95986e-12	-0.34672	0.153	0.342	1.39783e-07
Rpl39-ps	1.77594e-12	-0.353853	0.085	0.252	2.77065e-08
Rps16-ps2	3.912e-13	-0.355143	0.276	0.524	6.10311e-09
Ddost	1.10815e-13	-0.361948	0.117	0.31	1.72882e-09
Hspa5	1.99765e-11	-0.367235	0.407	0.622	3.11654e-07
Igf1	1.05326e-10	-0.37087	0.175	0.353	1.6432e-06
Surf4	4.96316e-13	-0.376659	0.119	0.306	7.74302e-09
Selenos	7.19863e-13	-0.379686	0.097	0.271	1.12306e-08
Ftl1	1.11974e-17	-0.380121	0.8	0.911	1.7469e-13
Cnbp	1.66266e-14	-0.382704	0.213	0.458	2.59391e-10
Serp1	6.54754e-16	-0.388857	0.13	0.355	1.02148e-11
Arf4	2.08968e-14	-0.398522	0.196	0.427	3.26011e-10
Ly6a	2.68131e-12	-0.403344	0.135	0.319	4.18311e-08
Apoe	1.27208e-12	-0.41084	0.719	0.638	1.98457e-08
Erh	1.4818e-13	-0.411616	0.097	0.278	2.31176e-09
Psap	2.45225e-11	-0.414073	0.24	0.454	3.82576e-07
Cstb	3.06709e-14	-0.422832	0.191	0.418	4.78497e-10
Rpl35	7.63947e-22	-0.423096	0.582	0.793	1.19183e-17
Rpl15	5.12968e-17	-0.423945	0.346	0.614	8.00282e-13
Ppp1r15a	5.96247e-15	-0.42608	0.128	0.34	9.30205e-11
Gm15500	2.93699e-14	-0.428071	0.081	0.26	4.58201e-10
Sar1a	4.50299e-16	-0.431005	0.085	0.282	7.02512e-12
Tpm3	1.44729e-13	-0.431579	0.081	0.251	2.25792e-09
Actr3	6.37702e-14	-0.437496	0.085	0.263	9.94879e-10
Pfn1	9.51529e-15	-0.441243	0.312	0.558	1.48448e-10
Vapa	2.24e-14	-0.444246	0.097	0.285	3.49462e-10
Adamts1	1.21884e-09	-0.462167	0.16	0.315	1.90151e-05
Ltbp4	1.49335e-14	-0.475514	0.121	0.317	2.32978e-10
Ssr4	1.23438e-17	-0.475684	0.112	0.342	1.92576e-13
H2-D1	6.23227e-12	-0.477229	0.387	0.598	9.72296e-08
Ier2	2.84643e-19	-0.481356	0.229	0.507	4.44071e-15
Htra1	4.59962e-12	-0.482433	0.245	0.443	7.17587e-08
Morf4l2	1.63132e-16	-0.483229	0.094	0.299	2.54502e-12
Ctsb	1.30337e-12	-0.484779	0.501	0.714	2.03339e-08
Mt1	2.87306e-15	-0.486681	0.202	0.43	4.48226e-11
Eif4e	2.67862e-15	-0.501346	0.074	0.257	4.17891e-11
Gm9385	1.37007e-16	-0.50148	0.065	0.254	2.13744e-12
Arpc2	7.5801e-19	-0.508761	0.189	0.456	1.18257e-14
Dcn	1.4687e-09	-0.508789	0.858	0.789	2.29132e-05
Fstl1	6.20376e-15	-0.510521	0.265	0.487	9.67849e-11
Gm14586	5.45114e-18	-0.51053	0.101	0.321	8.50433e-14
Sap18	2.3785e-16	-0.510666	0.067	0.255	3.71069e-12
Gm9843	2.20047e-20	-0.51473	0.126	0.384	3.43295e-16
Sqstm1	3.69989e-18	-0.522292	0.272	0.532	5.7722e-14
Rpl28-ps1	3.11686e-20	-0.533984	0.054	0.268	4.86261e-16
Actg1	8.3832e-24	-0.544693	0.404	0.676	1.30786e-19
Serinc3	3.59801e-15	-0.545419	0.099	0.292	5.61325e-11
Snx3	4.49615e-19	-0.546986	0.079	0.294	7.01445e-15
Col3a1	2.63329e-06	-0.54942	0.584	0.625	0.0410819
Rcn3	1.35956e-18	-0.549962	0.157	0.402	2.12105e-14
Zfand5	3.71386e-19	-0.551021	0.103	0.335	5.79399e-15
Fxyd5	8.47542e-14	-0.557198	0.106	0.286	1.32225e-09
Prkcdbp	8.13491e-20	-0.560701	0.092	0.323	1.26913e-15
Serf2	2.43597e-23	-0.564944	0.265	0.577	3.80035e-19
Litaf	3.70161e-18	-0.570702	0.133	0.365	5.77488e-14
Rpl10a-ps1	7.59068e-22	-0.575019	0.126	0.389	1.18422e-17
Hspa1b	1.72122e-14	-0.577355	0.099	0.283	2.68528e-10
Cd164	8.73375e-21	-0.585133	0.171	0.431	1.36255e-16
H2afz	1.88833e-16	-0.596345	0.169	0.393	2.94599e-12
Gm8430	2.59246e-20	-0.598567	0.079	0.306	4.0445e-16
Hspa1a	3.09812e-15	-0.603249	0.378	0.59	4.83338e-11
Ccnl1	2.20447e-17	-0.603951	0.088	0.292	3.43919e-13
Arpc1b	3.92676e-24	-0.613488	0.2	0.498	6.12613e-20
Gm7808	1.38574e-21	-0.614268	0.099	0.348	2.16189e-17
Gm5586	6.7966e-21	-0.61772	0.065	0.289	1.06034e-16
Gm13436	8.14696e-21	-0.618411	0.052	0.266	1.27101e-16
Sdcbp	4.86265e-19	-0.624431	0.117	0.35	7.58623e-15
Junb	4.44061e-19	-0.626419	0.292	0.547	6.92779e-15
Ldha	8.13505e-20	-0.627487	0.133	0.378	1.26915e-15
Sec61g	1.93462e-23	-0.627491	0.139	0.418	3.01819e-19
Gapdh	4.19315e-26	-0.633825	0.202	0.517	6.54173e-22
Dusp1	3.8404e-24	-0.635227	0.333	0.621	5.99141e-20
Wdr89	5.5618e-24	-0.63798	0.126	0.403	8.67696e-20
Plpp3	1.90308e-16	-0.643027	0.108	0.31	2.969e-12
Rpl10-ps3	4.74122e-25	-0.64572	0.101	0.379	7.39677e-21
Pnrc1	3.22778e-22	-0.649581	0.142	0.409	5.03565e-18
Gm10288	2.63273e-20	-0.654769	0.067	0.286	4.10732e-16
Cxcl10	2.35465e-15	-0.663649	0.09	0.273	3.67349e-11
Sh3bgrl3	1.09896e-19	-0.665422	0.135	0.377	1.71449e-15
Gas6	8.23161e-18	-0.669483	0.115	0.328	1.28421e-13
Gm4366	7.60741e-22	-0.671765	0.045	0.262	1.18683e-17
Tpt1-ps3	6.39479e-24	-0.681092	0.058	0.301	9.97652e-20
Ost4	5.93282e-23	-0.70398	0.074	0.316	9.25579e-19
Rpl31-ps8	1.63242e-22	-0.715842	0.043	0.261	2.54674e-18
Col1a2	3.38792e-17	-0.719931	0.643	0.713	5.28549e-13
Gm2000	4.91938e-34	-0.722473	0.303	0.645	7.67472e-30
Gm9794	1.05322e-24	-0.725826	0.083	0.344	1.64313e-20
Jun	1.64132e-22	-0.730701	0.346	0.6	2.56063e-18
Ppia	9.39076e-34	-0.732331	0.308	0.648	1.46505e-29
Rps13-ps2	7.45953e-24	-0.738774	0.049	0.282	1.16376e-19
Col5a1	9.19091e-23	-0.740543	0.067	0.304	1.43387e-18
Sparc	1.73066e-27	-0.740637	0.76	0.839	2.70001e-23
Tspo	5.62871e-24	-0.745534	0.074	0.321	8.78136e-20
Tyrobp	2.5774e-11	-0.762347	0.126	0.275	4.021e-07
Sptssa	1.05984e-18	-0.764503	0.058	0.255	1.65346e-14
Phlda1	2.34481e-24	-0.769758	0.151	0.431	3.65814e-20
Crispld2	2.31802e-21	-0.772084	0.146	0.394	3.61635e-17
Plk2	9.6663e-21	-0.782194	0.049	0.257	1.50804e-16
Lmna	8.77646e-24	-0.79839	0.063	0.302	1.36922e-19
Gm11478	2.4636e-26	-0.798769	0.081	0.349	3.84346e-22
Col6a1	5.98666e-23	-0.800102	0.409	0.595	9.33979e-19
Nr4a1	9.06989e-22	-0.803856	0.079	0.308	1.41499e-17
Eef1a1	1.75506e-46	-0.80509	0.508	0.77	2.73807e-42
Rps26-ps1	6.73326e-28	-0.807517	0.045	0.306	1.05046e-23
Cd63-ps	2.7019e-24	-0.818163	0.144	0.407	4.21523e-20
Crip1	6.63596e-28	-0.819769	0.193	0.513	1.03528e-23
Sat1	4.25387e-24	-0.836383	0.103	0.361	6.63646e-20
Gm11361	5.72199e-37	-0.851277	0.198	0.559	8.92688e-33
Spon2	1.55751e-31	-0.85973	0.108	0.425	2.42988e-27
Btg2	2.98472e-28	-0.86504	0.079	0.358	4.65647e-24
Raly	9.00226e-38	-0.898544	0.207	0.566	1.40444e-33
Rps3a2	4.4674e-28	-0.90138	0.02	0.262	6.96958e-24
Pim1	7.4899e-32	-0.909074	0.117	0.431	1.1685e-27
Gm14303	5.57721e-42	-0.909372	0.157	0.547	8.701e-38
Rps6	4.42008e-45	-0.912038	0.245	0.627	6.89576e-41
Col1a1	1.5299e-21	-0.912957	0.589	0.686	2.38679e-17
Gm12481	2.53055e-27	-0.913811	0.034	0.278	3.9479e-23
Dnajb1	1.88731e-29	-0.918819	0.115	0.412	2.94439e-25
Gadd45g	2.67211e-35	-0.925335	0.387	0.677	4.16876e-31
Ifrd1	2.17227e-35	-0.93655	0.13	0.473	3.38895e-31
Rps27rt	4.21811e-32	-0.938795	0.049	0.339	6.58068e-28
Fos	3.14625e-45	-0.946536	0.402	0.744	4.90846e-41
Col6a2	2.59614e-32	-0.953145	0.407	0.638	4.05024e-28
Gsn	1.04511e-39	-0.954255	0.283	0.622	1.63047e-35
Hsd11b2	1.85681e-23	-0.959995	0.094	0.335	2.8968e-19
Btg1	7.43042e-30	-0.960345	0.056	0.332	1.15922e-25
Vim	3.54202e-36	-0.964318	0.18	0.521	5.52591e-32
Ctsh	4.75589e-29	-0.967523	0.058	0.329	7.41966e-25
Gm5805	2.40139e-41	-0.969065	0.121	0.5	3.74641e-37
Zfp36	3.33977e-32	-0.969722	0.175	0.499	5.21038e-28
Spon1	6.71224e-27	-0.982585	0.045	0.291	1.04718e-22
Emp1	3.93763e-28	-0.984177	0.079	0.351	6.1431e-24
Bhlhe40	1.8835e-28	-1.00256	0.038	0.293	2.93845e-24
Ackr3	1.16345e-24	-1.00551	0.031	0.254	1.8151e-20
Sgk1	1.3001e-28	-1.0158	0.099	0.378	2.02829e-24
Gm10736	3.7706e-54	-1.03404	0.303	0.675	5.88251e-50
Ramp3	6.44397e-28	-1.03418	0.101	0.373	1.00532e-23
Gng12	1.5414e-34	-1.03686	0.119	0.441	2.40474e-30
Rpl14-ps1	2.20141e-35	-1.06635	0.025	0.318	3.43443e-31
Gm13588	2.1186e-31	-1.07797	0.018	0.278	3.30523e-27
Uba52	6.91154e-42	-1.09456	0.094	0.457	1.07827e-37
Rps23-ps1	5.71845e-39	-1.10005	0.034	0.355	8.92135e-35
Cyr61	2.56795e-31	-1.11301	0.198	0.488	4.00626e-27
Klf4	7.82391e-38	-1.11914	0.081	0.412	1.22061e-33
Atf3	3.97212e-33	-1.13763	0.058	0.354	6.1969e-29
Gm10076	2.43701e-47	-1.1399	0.11	0.503	3.80197e-43
Nfkbia	1.4049e-46	-1.15211	0.225	0.609	2.19179e-42
Ubc	2.76671e-82	-1.16329	0.454	0.838	4.31635e-78
Fcer1g	8.99469e-23	-1.16695	0.072	0.297	1.40326e-18
Rpl37rt	2.12184e-43	-1.1711	0.063	0.424	3.31028e-39
Rpl18-ps1	7.20553e-35	-1.17295	0.007	0.28	1.12413e-30
Rps19-ps6	2.69982e-40	-1.18116	0.031	0.357	4.21198e-36
Anxa2	1.5643e-52	-1.18594	0.164	0.574	2.44047e-48
Gm1821	3.43288e-47	-1.19949	0.11	0.499	5.35563e-43
Gm8730	2.04313e-38	-1.20459	0.02	0.326	3.18748e-34
Klf6	3.92304e-40	-1.2281	0.054	0.389	6.12033e-36
Ogn	7.02342e-42	-1.25566	0.076	0.426	1.09572e-37
Anxa3	4.09637e-39	-1.26014	0.013	0.318	6.39075e-35
Cd34	9.60888e-46	-1.27775	0.079	0.449	1.49908e-41
Gm5905	9.07604e-45	-1.28196	0.031	0.382	1.41595e-40
Col6a4	4.73957e-40	-1.2866	0.119	0.456	7.3942e-36
Anxa1	1.26063e-39	-1.29402	0.056	0.387	1.96671e-35
Rpl3-ps1	5.74093e-45	-1.30338	0.031	0.381	8.95643e-41
Ddit4l	2.68207e-34	-1.30595	0.027	0.31	4.1843e-30
Col6a3	1.16039e-42	-1.31866	0.162	0.505	1.81033e-38
Gm15427	4.03802e-72	-1.3565	0.207	0.671	6.29971e-68
Gm8797	7.98475e-52	-1.37508	0.081	0.481	1.2457e-47
Tnfaip6	3.44624e-31	-1.38583	0.013	0.267	5.37648e-27
Fbln2	2.1974e-38	-1.40745	0.056	0.375	3.42817e-34
Adh1	6.21432e-45	-1.41177	0.126	0.503	9.69496e-41
Errfi1	4.94673e-40	-1.44194	0.043	0.367	7.7174e-36
P2ry14	6.19857e-37	-1.46969	0.027	0.324	9.6704e-33
Lgals3	1.27665e-39	-1.47338	0.043	0.37	1.9917e-35
Prss23	6.39574e-60	-1.51077	0.112	0.545	9.978e-56
H2-Ab1	2.02634e-09	-1.52226	0.189	0.345	3.1613e-05
Rps6-ps4	3.98669e-54	-1.52418	0.022	0.416	6.21963e-50
Fosb	1.13931e-56	-1.57981	0.081	0.499	1.77744e-52
Ccl11	1.84855e-33	-1.64145	0.004	0.266	2.88393e-29
Ftl1-ps1	3.6617e-66	-1.73465	0.083	0.537	5.71261e-62
Igha	3.4171e-44	-1.88871	0.079	0.447	5.33102e-40
Ccl2	1.74527e-36	-2.06346	0.018	0.305	2.7228e-32
Igkc	4.86274e-66	-2.06442	0.094	0.564	7.58636e-62
Cd74	2.47053e-13	-2.1462	0.175	0.361	3.85428e-09
Ccl7	1.55762e-57	-2.16771	0.016	0.42	2.43005e-53
Atpif1	4.22091e-06	0.487735	0.447	0.432	0.0658504
Gabarap	7.15148e-06	0.342553	0.539	0.559	0.11157
Ctsd	1.54071e-05	-0.275601	0.243	0.389	0.240367
Cox6a1	1.68225e-05	0.352182	0.571	0.604	0.262447
Gadd45b	2.69838e-05	0.5234	0.297	0.233	0.420975
Lum	5.06688e-05	-0.309465	0.398	0.525	0.790484
Lyz2	6.39488e-05	-1.32842	0.234	0.339	0.997665
Marcksl1	6.95134e-05	0.487212	0.319	0.275	1
Ifi27l2a	0.00013355	0.393887	0.375	0.338	1
Usmg5	0.000252952	0.38256	0.429	0.441	1
Ndufb6	0.000253405	0.517389	0.279	0.241	1
Nedd4	0.000264622	0.483748	0.366	0.352	1
Tceal9	0.00030914	0.363943	0.485	0.509	1
Mfap4	0.000334283	0.478507	0.362	0.334	1
2010107E04Rik	0.000497197	0.43319	0.364	0.349	1
Tcf4	0.000563726	0.518847	0.283	0.244	1
Ndufa7	0.000609138	0.452559	0.371	0.362	1
Rabac1	0.000704561	0.48626	0.315	0.287	1
Igfbp5	0.00085688	0.485657	0.261	0.214	1
Tbcb	0.00114033	0.454215	0.258	0.221	1
Dynlrb1	0.00115208	0.438854	0.375	0.379	1
Atp5k	0.00166897	0.383507	0.38	0.375	1
Cdc42	0.00703829	0.273788	0.49	0.55	1
Capzb	0.00851018	0.382704	0.375	0.391	1
Elob	0.00968398	0.335248	0.445	0.49	1
Psma7	0.0105697	0.403132	0.357	0.371	1
Romo1	0.0133345	0.473741	0.279	0.273	1
Zfas1	0.0153628	0.359831	0.294	0.276	1
Csrp1	0.0194933	0.424546	0.265	0.252	1
Fxyd1	0.0199068	0.372694	0.254	0.236	1
Zfp36l1	0.0267731	0.324621	0.364	0.376	1
Flna	0.0338332	0.394756	0.306	0.31	1
Dynll1	0.0517484	0.349321	0.396	0.44	1
Ndufa5	0.0548708	0.376636	0.292	0.296	1
Sec62	0.0692263	0.317992	0.393	0.442	1
Ndufa1	0.073015	0.399406	0.283	0.293	1
Snrpg	0.0868581	0.312254	0.36	0.393	1
Lamp1	0.0901897	0.345311	0.351	0.379	1
Tomm7	0.0961233	0.321212	0.279	0.284	1
Hspb1	0.0963708	-0.526555	0.258	0.31	1
Ndufa3	0.102671	0.322755	0.398	0.459	1
Itm2c	0.127021	0.380226	0.252	0.26	1
Hint1	0.127842	0.272743	0.409	0.471	1
Atp5j2	0.15332	0.251758	0.402	0.458	1
Pcbp1	0.166724	0.303341	0.315	0.338	1
Tubb5	0.171185	0.375043	0.306	0.336	1
Ier3	0.199887	-0.30592	0.335	0.393	1
Calr	0.292236	0.251751	0.402	0.472	1
Prdx2	0.305521	0.293611	0.31	0.346	1
Nedd8	0.321896	0.29461	0.308	0.349	1
Ndufv3	0.356446	0.352975	0.254	0.279	1
Gpx8	0.424289	0.308601	0.29	0.329	1
Snrpd3	0.446917	0.380499	0.254	0.282	1
Smdt1	0.593447	0.277698	0.276	0.315	1
Pebp1	0.598822	0.278426	0.211	0.258	1
Uqcr11	0.656696	0.253045	0.283	0.324	1
Ndufb11	0.776878	0.315184	0.211	0.256	1
Edf1	0.860943	0.271458	0.22	0.251	1
Atp6v1f	0.883037	0.258965	0.281	0.332	1
Uqcrq	0.907094	0.27862	0.292	0.353	1
Hmgn1	0.937105	0.300721	0.27	0.32	1
Map1lc3a	0.969083	0.27432	0.303	0.368	1

## Sheet: 4 myofibroblast
Table S2: Representative genes of each cell cluster
	p_val	avg_logFC	pct.1	pct.2	p_val_adj
Cxcl1	2.14389e-124	2.02927	0.495	0.069	3.34469e-120
Has1	7.39354e-209	2.00019	0.57	0.047	1.15347e-204
Adh1	7.90899e-136	1.71167	0.938	0.418	1.23388e-131
Ccl2	3.54748e-97	1.59849	0.742	0.231	5.53443e-93
Hk2	5.90585e-137	1.57275	0.742	0.16	9.21372e-133
Col3a1	6.41219e-131	1.44031	0.99	0.59	1.00037e-126
Mt2	3.11832e-88	1.43377	0.488	0.095	4.86489e-84
Ifi205	6.54102e-142	1.43335	0.491	0.053	1.02046e-137
Lum	2.51637e-125	1.42175	0.976	0.471	3.92578e-121
Adamts1	1.66501e-116	1.34457	0.845	0.25	2.59759e-112
Fgl2	4.47175e-70	1.30633	0.457	0.1	6.97638e-66
Tnfaip6	4.23353e-77	1.21115	0.677	0.2	6.60473e-73
Col1a2	2.79816e-108	1.1556	0.997	0.681	4.36541e-104
Serpine1	2.03366e-78	1.13652	0.612	0.16	3.17271e-74
Pcolce	1.18874e-100	1.07048	0.536	0.093	1.85456e-96
Gfpt2	1.58414e-99	1.07008	0.354	0.039	2.47142e-95
Clec3b	9.12125e-120	1.04729	0.423	0.044	1.42301e-115
Sgk1	3.74993e-63	1.00971	0.78	0.309	5.85027e-59
Sfrp4	1.20306e-55	1.00394	0.485	0.128	1.8769e-51
Col1a1	7.9364e-87	1.00239	0.993	0.647	1.23816e-82
Sparc	2.95488e-105	0.997971	1	0.816	4.60992e-101
Col15a1	1.45617e-83	0.987816	0.687	0.183	2.27177e-79
Errfi1	5.06507e-68	0.985475	0.777	0.291	7.90202e-64
Vcam1	4.66937e-96	0.970979	0.399	0.051	7.28468e-92
Col5a1	6.87674e-75	0.95303	0.735	0.238	1.07284e-70
1700086L19Rik	1.00685e-88	0.95285	0.271	0.024	1.57078e-84
Olfml3	2.46606e-69	0.951824	0.756	0.255	3.8473e-65
Gsn	8.98517e-82	0.946568	0.973	0.549	1.40178e-77
Prss23	5.3018e-80	0.939367	0.945	0.456	8.27133e-76
Ugdh	4.2144e-65	0.933461	0.375	0.07	6.57488e-61
Akr1c14	2.36383e-65	0.914667	0.405	0.081	3.68781e-61
Cxcl10	1.69655e-57	0.910017	0.653	0.218	2.64679e-53
Col14a1	1.46814e-112	0.90263	0.361	0.032	2.29045e-108
Col6a3	5.37198e-77	0.898558	0.952	0.424	8.38083e-73
Pdpn	2.32332e-91	0.877939	0.405	0.056	3.62461e-87
Cryab	7.284e-28	0.876073	0.485	0.203	1.13638e-23
Ptpn5	3.59303e-67	0.87354	0.299	0.043	5.60548e-63
Tubb2a	3.2895e-50	0.872821	0.522	0.161	5.13195e-46
Dnajb4	1.17365e-68	0.871629	0.54	0.133	1.831e-64
Serpinh1	3.66702e-76	0.856846	0.976	0.591	5.72092e-72
Cyr61	3.17512e-58	0.853558	0.893	0.417	4.9535e-54
Tnfrsf12a	1.25623e-50	0.84842	0.54	0.171	1.95984e-46
Mt1	1.53705e-31	0.844108	0.718	0.377	2.39795e-27
Itga5	1.53995e-59	0.840097	0.519	0.135	2.40247e-55
Cd55	3.31076e-56	0.82874	0.381	0.082	5.16512e-52
Plod2	1.42792e-62	0.825676	0.567	0.153	2.2277e-58
Fosb	2.76195e-57	0.815445	0.883	0.413	4.30892e-53
Flrt2	1.08056e-82	0.815093	0.302	0.033	1.68578e-78
Tmem45a	9.87271e-67	0.805327	0.344	0.056	1.54024e-62
Plk2	3.27789e-41	0.800715	0.557	0.205	5.11383e-37
Efemp1	2.67313e-77	0.796249	0.333	0.044	4.17034e-73
Csf1	3.41163e-59	0.794892	0.302	0.049	5.32248e-55
Mmp19	6.65677e-44	0.787941	0.502	0.16	1.03852e-39
Sqstm1	6.96925e-43	0.783871	0.835	0.473	1.08727e-38
Emp1	1.47878e-42	0.776876	0.684	0.288	2.30705e-38
Rcn3	2.09091e-56	0.76868	0.821	0.335	3.26203e-52
Gm8797	4.57747e-56	0.766939	0.887	0.396	7.14131e-52
Gm1821	3.73171e-56	0.765943	0.897	0.416	5.82184e-52
Fstl1	1.0857e-52	0.765852	0.876	0.425	1.69379e-48
Rasd1	5.3058e-31	0.763828	0.388	0.131	8.27758e-27
Dpt	5.55738e-58	0.761524	0.876	0.394	8.67007e-54
Col6a1	6.98138e-61	0.756067	0.966	0.54	1.08917e-56
Igfbp6	2.61071e-50	0.74007	0.856	0.457	4.07296e-46
Tcf21	6.61046e-49	0.736706	0.54	0.162	1.0313e-44
Cd34	1.46552e-52	0.733771	0.849	0.368	2.28636e-48
Col6a2	1.88043e-60	0.72929	0.986	0.579	2.93365e-56
S100a10	1.10081e-51	0.713965	0.914	0.478	1.71737e-47
Bhlhe40	8.35881e-44	0.711	0.625	0.232	1.30406e-39
Rcn1	3.41419e-50	0.709079	0.526	0.154	5.32648e-46
Cd63-ps	5.2303e-54	0.707834	0.849	0.336	8.15979e-50
Nrp1	2.70088e-50	0.696473	0.419	0.104	4.21364e-46
Lmna	6.33485e-47	0.694215	0.656	0.242	9.883e-43
Anxa2	8.53079e-52	0.691935	0.938	0.49	1.33089e-47
Maged2	4.04021e-35	0.688927	0.409	0.131	6.30314e-31
Csrnp1	7.78071e-40	0.688449	0.454	0.143	1.21387e-35
Cd248	6.4514e-44	0.683838	0.464	0.139	1.00648e-39
Serpinb6a	2.4276e-44	0.681249	0.522	0.168	3.7873e-40
Vegfd	3.15766e-63	0.679802	0.309	0.046	4.92626e-59
Pi15	2.99066e-72	0.679366	0.251	0.026	4.66572e-68
Col5a2	6.47857e-49	0.679003	0.632	0.211	1.01072e-44
Adamts4	1.26868e-53	0.678856	0.258	0.039	1.97927e-49
Dnajb1	2.86712e-23	0.67256	0.67	0.352	4.473e-19
Adamts2	9.87631e-43	0.669971	0.612	0.223	1.5408e-38
Meg3	1.04018e-47	0.66756	0.57	0.18	1.62278e-43
Nppc	7.13929e-24	0.666011	0.443	0.183	1.1138e-19
C1qtnf6	2.3062e-46	0.660812	0.333	0.073	3.5979e-42
B2m	9.96505e-43	-1.09198	0.887	0.881	1.55465e-38
St3gal5	2.05868e-54	0.659735	0.261	0.039	3.21175e-50
Gm10177	1.08687e-40	0.658803	0.502	0.167	1.69563e-36
Cxcl16	4.22102e-56	0.651948	0.533	0.142	6.58522e-52
Crtap	2.32844e-49	0.64891	0.347	0.074	3.63261e-45
Hmgn2	6.29708e-39	0.646603	0.505	0.172	9.82408e-35
Tnfsf9	2.07458e-42	0.643962	0.309	0.068	3.23656e-38
Mesdc1	1.51989e-30	0.633299	0.309	0.089	2.37117e-26
Dcbld2	1.25522e-31	0.632356	0.285	0.075	1.95827e-27
Plpp3	3.60261e-35	0.62625	0.629	0.257	5.62044e-31
Raly	3.12008e-43	0.622074	0.911	0.491	4.86763e-39
Morf4l2	1.58243e-36	0.613437	0.625	0.245	2.46875e-32
Tmsb4x	4.91008e-39	-0.836459	0.993	0.988	7.66022e-35
Etfa	2.39746e-35	0.609048	0.381	0.114	3.74027e-31
S100a6	3.00691e-43	0.605181	0.924	0.553	4.69109e-39
Ly6c1	4.34951e-49	0.59682	0.419	0.104	6.78567e-45
Spon1	1.58414e-31	0.585225	0.581	0.235	2.47142e-27
Rassf8	8.90769e-53	0.584689	0.254	0.038	1.38969e-48
Pnp	1.42596e-30	0.581185	0.512	0.198	2.22464e-26
mt-Nd4	4.20377e-36	-0.693922	0.935	0.909	6.5583e-32
Fbn1	3.99882e-37	0.580774	0.55	0.195	6.23855e-33
Frmd6	1.51283e-34	0.57877	0.265	0.061	2.36016e-30
Myc	4.97765e-34	0.577751	0.416	0.133	7.76563e-30
Sec61g	1.4358e-33	0.576328	0.759	0.354	2.23999e-29
S100a16	1.34024e-32	0.576145	0.529	0.199	2.09091e-28
Gstp1	3.6352e-31	0.573887	0.443	0.156	5.67128e-27
mt-Rnr2	1.67941e-34	-1.27571	0.869	0.901	2.62004e-30
Nfkbia	2.00989e-34	0.573334	0.876	0.537	3.13564e-30
Thbs1	4.55589e-33	0.571651	0.653	0.29	7.10765e-29
Vapa	7.81014e-30	0.569263	0.564	0.237	1.21846e-25
Socs1	1.38661e-32	0.56908	0.271	0.067	2.16324e-28
Copz2	6.89881e-33	0.568364	0.378	0.115	1.07628e-28
Csrp2	7.90797e-42	0.568117	0.326	0.075	1.23372e-37
Ampd3	4.19918e-44	0.563822	0.313	0.066	6.55115e-40
Ogn	1.10966e-41	0.562818	0.804	0.349	1.73118e-37
Tgfbr2	3.15244e-40	0.562413	0.498	0.158	4.91813e-36
Igf1	1.59996e-22	0.561401	0.612	0.308	2.4961e-18
Gm12481	6.48681e-34	0.559029	0.574	0.222	1.01201e-29
mt-Cytb	1.13175e-32	-0.523303	0.979	0.96	1.76564e-28
Vkorc1	5.66156e-31	0.554276	0.495	0.184	8.8326e-27
Prkcdbp	5.76633e-34	0.551301	0.649	0.266	8.99606e-30
B4galt5	1.77293e-35	0.551026	0.265	0.06	2.76595e-31
Gm42418	2.51162e-07	0.550945	0.271	0.151	0.00391839
Txndc5	2.11575e-32	0.550905	0.388	0.124	3.30078e-28
Tiparp	3.73666e-22	0.550415	0.278	0.093	5.82956e-18
Calu	6.37927e-31	0.5502	0.588	0.244	9.9523e-27
P4hb	4.42985e-31	0.549192	0.818	0.429	6.91101e-27
Vim	2.5304e-38	0.54718	0.887	0.446	3.94767e-34
Gm10736	4.57339e-42	0.545956	0.966	0.603	7.13495e-38
Gja1	2.30931e-27	0.545793	0.471	0.181	3.60275e-23
Rnf19a	1.32004e-32	0.541734	0.292	0.075	2.05939e-28
Sar1a	8.99889e-36	0.53399	0.605	0.23	1.40392e-31
Col16a1	2.63413e-30	0.53397	0.326	0.096	4.1095e-26
Gm13588	4.89556e-23	0.532427	0.502	0.226	7.63757e-19
Gm15421	2.92158e-24	0.531931	0.323	0.111	4.55795e-20
Gstp-ps	5.80946e-30	0.531042	0.299	0.085	9.06334e-26
Gm10076	1.80232e-33	0.527425	0.856	0.423	2.8118e-29
Ftl1-ps1	2.1268e-39	0.526997	0.914	0.447	3.31802e-35
Arf4	6.49893e-29	0.526947	0.753	0.37	1.0139e-24
Nr4a1	2.00383e-25	0.526337	0.567	0.257	3.12617e-21
Ost4	1.62141e-29	0.523056	0.608	0.26	2.52956e-25
Gadd45g	9.4201e-38	0.522913	0.966	0.615	1.46963e-33
Ngfr	1.41444e-28	0.522032	0.498	0.192	2.20667e-24
Vcan	5.08025e-39	0.520399	0.282	0.061	7.9257e-35
Sec24d	3.28945e-25	0.517897	0.33	0.111	5.13187e-21
Rps27	1.35541e-29	-0.512992	0.973	0.969	2.11458e-25
Oat	3.60801e-30	0.512791	0.443	0.157	5.62886e-26
Gas6	5.39616e-30	0.512071	0.643	0.274	8.41855e-26
Ssr3	8.54901e-28	0.511496	0.564	0.241	1.33373e-23
Nme2	1.7701e-28	0.509179	0.43	0.156	2.76154e-24
Rps19-ps6	7.98676e-34	0.508644	0.687	0.287	1.24601e-29
Inhbb	4.92553e-26	0.508142	0.433	0.163	7.68432e-22
Ifrd1	1.62242e-24	0.50617	0.746	0.406	2.53114e-20
Rpl3-ps1	2.07791e-27	0.504668	0.667	0.312	3.24175e-23
Msrb2	1.02142e-28	0.502388	0.364	0.116	1.59352e-24
Sdc4	1.87925e-23	0.501299	0.351	0.127	2.93181e-19
Bzw2	2.37461e-24	0.497391	0.251	0.073	3.70462e-20
Ugp2	3.73022e-23	0.495792	0.326	0.114	5.81952e-19
Trabd2b	2.54994e-29	0.495634	0.354	0.11	3.97816e-25
Btg2	2.82306e-25	0.494478	0.632	0.299	4.40426e-21
Hpgd	1.01625e-31	0.492506	0.268	0.065	1.58545e-27
Fkbp7	4.91521e-34	0.489225	0.436	0.138	7.66822e-30
Il6st	3.91857e-28	0.483077	0.519	0.207	6.11337e-24
Ly6a	5.59055e-30	0.481325	0.629	0.27	8.72181e-26
Pnrc1	9.91824e-23	0.480249	0.684	0.351	1.54734e-18
Nop58	8.4427e-22	0.479326	0.344	0.127	1.31714e-17
Srm	2.7719e-22	0.478878	0.368	0.14	4.32444e-18
Pim1	1.80885e-27	0.478326	0.732	0.365	2.82199e-23
Gstm5	2.78842e-29	0.473277	0.313	0.09	4.35021e-25
Postn	1.33844e-43	0.472582	0.254	0.044	2.0881e-39
Fth1	1.49192e-26	-0.679635	0.973	0.961	2.32754e-22
Ltbp4	5.52508e-34	0.471858	0.67	0.263	8.61968e-30
Ifi204	5.85484e-26	0.471092	0.258	0.07	9.13414e-22
Fkbp9	4.70004e-32	0.470578	0.361	0.106	7.33254e-28
Mmp23	6.0793e-29	0.470577	0.485	0.184	9.48432e-25
Oaf	2.41531e-25	0.467452	0.344	0.114	3.76813e-21
Rpsa-ps10	2.84409e-26	0.467024	0.337	0.109	4.43706e-22
Nab2	1.34004e-25	0.465019	0.282	0.083	2.0906e-21
Matn2	1.64057e-31	0.464588	0.543	0.201	2.55945e-27
Spon2	4.8745e-26	0.464197	0.729	0.359	7.60471e-22
2310022B05Rik	1.01335e-23	0.463933	0.436	0.172	1.58092e-19
Sphk1	4.62901e-20	0.463478	0.296	0.105	7.22171e-16
Gm4366	5.12856e-27	0.463372	0.522	0.212	8.00107e-23
Ppp1r2	1.55553e-18	0.463081	0.385	0.164	2.42679e-14
Gnas	1.01898e-25	0.462516	0.873	0.559	1.5897e-21
Ptprs	7.84246e-22	0.462302	0.271	0.087	1.2235e-17
Pmp22	5.68844e-23	0.461624	0.344	0.122	8.87454e-19
Nfkb1	1.24143e-26	0.460956	0.275	0.078	1.93675e-22
Gm12338	3.87374e-20	0.460045	0.361	0.146	6.04342e-16
Pgr	2.29555e-26	0.459207	0.344	0.111	3.58129e-22
Cd44	4.67029e-27	0.454732	0.296	0.086	7.28612e-23
Igha	4.18114e-25	-0.343712	0.777	0.372	6.52299e-21
Itgb1	2.72144e-25	0.45359	0.495	0.202	4.24573e-21
Ptgis	1.99098e-41	0.452894	0.258	0.048	3.10612e-37
Snhg18	1.00674e-27	0.452282	0.54	0.215	1.57061e-23
Nr4a2	6.47502e-28	0.450205	0.289	0.081	1.01017e-23
Rps23-ps1	8.5015e-27	0.448375	0.649	0.289	1.32632e-22
Gm10250	3.70122e-22	0.4482	0.368	0.14	5.77428e-18
Rpl14-ps1	1.599e-27	0.448083	0.601	0.256	2.4946e-23
Gpx8	2.24597e-30	0.446406	0.687	0.294	3.50394e-26
Yipf5	3.59589e-25	0.443348	0.43	0.161	5.60994e-21
Plat	1.595e-20	0.440962	0.261	0.084	2.48836e-16
Pdia6	2.47803e-25	0.435888	0.756	0.38	3.86598e-21
Rps26-ps1	2.13078e-22	0.431814	0.553	0.251	3.32423e-18
Azin1	5.55072e-18	0.428806	0.296	0.113	8.65968e-14
Gm10132	1.28073e-22	0.425664	0.361	0.134	1.99806e-18
Dcn	4.65339e-31	0.42557	1	0.78	7.25976e-27
Tubb6	2.29426e-25	0.424502	0.522	0.212	3.57927e-21
Rpl39-ps	3.48514e-18	0.423756	0.46	0.213	5.43717e-14
Anxa1	2.40538e-24	0.422119	0.67	0.32	3.75263e-20
Uap1	2.60631e-25	0.421251	0.261	0.075	4.0661e-21
Gm5905	6.25815e-24	0.420693	0.66	0.314	9.76334e-20
Mxra8	3.62507e-19	0.420116	0.364	0.147	5.65547e-15
Rps29	2.33132e-23	-0.43794	0.959	0.946	3.63709e-19
Serf2	2.26871e-23	0.417479	0.897	0.511	3.53942e-19
Tmed3	4.41568e-24	0.416812	0.526	0.222	6.8889e-20
P4ha2	1.06062e-27	0.416795	0.261	0.069	1.65467e-23
Anxa3	1.0721e-23	0.416599	0.574	0.258	1.67258e-19
Hmox1	3.06874e-21	0.416251	0.423	0.174	4.78754e-17
Ppp1r15a	8.57353e-18	0.413782	0.577	0.293	1.33756e-13
Rps10-ps2	5.9499e-15	0.413713	0.385	0.182	9.28244e-11
Rps15a-ps6	1.97757e-25	0.412531	0.457	0.175	3.08521e-21
Rps3a2	3.9851e-22	0.410927	0.495	0.211	6.21715e-18
Gm6863	3.08156e-16	0.409335	0.385	0.176	4.80755e-12
Eif4e	5.01122e-19	0.408833	0.467	0.216	7.81801e-15
C1ra	3.60572e-26	0.407807	0.357	0.117	5.62528e-22
Pttg1ip	8.92822e-23	0.407322	0.471	0.195	1.39289e-18
Smim7	1.322e-24	0.405752	0.395	0.144	2.06245e-20
Gm5526	1.39886e-15	0.405576	0.285	0.116	2.18236e-11
mt-Rnr1	2.98662e-22	-1.39045	0.436	0.583	4.65942e-18
Chchd10	3.46544e-22	-2.119	0.038	0.297	5.40643e-18
Cnot8	2.17682e-21	0.405042	0.254	0.079	3.39606e-17
Rpl31-ps8	2.31384e-22	0.404905	0.498	0.213	3.60982e-18
Kdelr2	4.40078e-18	0.403834	0.364	0.152	6.86566e-14
Tgfb2	1.49758e-20	0.403619	0.268	0.087	2.33637e-16
Ppib	5.50375e-20	0.40142	0.753	0.418	8.5864e-16
Gm10073	5.93915e-19	0.400655	0.454	0.2	9.26566e-15
Rps25-ps1	7.91642e-19	0.399406	0.392	0.165	1.23504e-14
Pofut2	2.86216e-17	0.398594	0.316	0.125	4.46526e-13
Rab1a	2.30814e-20	0.398236	0.553	0.263	3.60092e-16
Adm	2.00052e-19	0.397143	0.45	0.199	3.12102e-15
Lox	1.77261e-25	0.394608	0.574	0.241	2.76545e-21
Maged1	3.29625e-23	0.394303	0.584	0.262	5.14247e-19
Limd1	3.50559e-24	0.393373	0.32	0.105	5.46907e-20
Ezr	3.9325e-22	0.392585	0.296	0.098	6.1351e-18
Gpx7	1.15117e-23	0.389783	0.302	0.097	1.79594e-19
Gm6472	3.08889e-21	0.388471	0.381	0.148	4.81899e-17
Gem	1.29239e-21	0.388224	0.426	0.169	2.01625e-17
Dbi	1.4103e-17	0.384775	0.68	0.366	2.20021e-13
Oaz1-ps	1.11729e-18	0.384457	0.296	0.11	1.74309e-14
Gm2000	5.20152e-21	0.381799	0.928	0.577	8.11489e-17
Ccl7	2.29748e-31	0.381216	0.749	0.34	3.5843e-27
Eif1a	4.28721e-17	0.380798	0.361	0.154	6.68848e-13
Rps6-ps4	5.09673e-24	0.380706	0.715	0.34	7.9514e-20
Ddost	1.01983e-19	0.380092	0.557	0.265	1.59104e-15
Rhoc	3.0798e-20	0.378777	0.495	0.22	4.8048e-16
Maff	4.42648e-17	0.378263	0.285	0.108	6.90575e-13
Prnp	3.43621e-24	0.374655	0.454	0.175	5.36083e-20
Lgals1	4.51376e-28	0.374254	0.99	0.835	7.04192e-24
Gm6136	6.52459e-19	0.373874	0.45	0.2	1.0179e-14
Rpl18-ps1	3.36156e-19	0.373595	0.502	0.227	5.24438e-15
Mdm2	1.80726e-18	0.372899	0.254	0.086	2.8195e-14
Fos	6.95328e-11	0.37248	0.89	0.688	1.08478e-06
Hdac1	9.81723e-17	0.372461	0.268	0.1	1.53159e-12
Loxl2	1.12258e-23	0.370701	0.412	0.153	1.75134e-19
Foxo1	2.58601e-23	0.370582	0.309	0.101	4.03444e-19
Anxa6	4.26878e-22	0.370492	0.488	0.208	6.65973e-18
Gm10275	1.48494e-19	0.370126	0.44	0.189	2.31665e-15
Ackr3	5.49034e-22	0.368541	0.488	0.206	8.56547e-18
Gm14586	5.07893e-21	0.36644	0.584	0.271	7.92365e-17
Col5a3	1.28429e-21	0.36595	0.251	0.076	2.00362e-17
Icam1	2.78543e-27	0.365372	0.378	0.125	4.34554e-23
Gm5835	8.77288e-13	0.364663	0.302	0.137	1.36866e-08
Gstm2	2.64639e-19	0.363876	0.399	0.165	4.12864e-15
Serpinf1	1.32859e-23	0.363381	0.667	0.306	2.07274e-19
Rbbp7	8.13384e-19	0.362322	0.426	0.183	1.26896e-14
Actb	3.37616e-19	-0.652166	0.746	0.756	5.26714e-15
Il4ra	8.15638e-16	0.362229	0.289	0.115	1.27248e-11
Sgce	5.2126e-24	0.361849	0.251	0.07	8.13218e-20
Slc25a4	7.39388e-22	0.361626	0.777	0.403	1.15352e-17
Slc25a39	1.72777e-19	0.361474	0.416	0.175	2.6955e-15
Tceal8	2.00402e-20	0.360774	0.502	0.217	3.12647e-16
Btg1	8.88188e-21	0.360722	0.591	0.275	1.38566e-16
Ssr4	1.18265e-18	0.360363	0.595	0.291	1.84505e-14
Gm3788	1.15522e-15	0.359411	0.323	0.136	1.80225e-11
Pdia3	3.00107e-17	0.359254	0.694	0.386	4.68197e-13
Rpl18-ps2	7.36845e-18	0.358488	0.278	0.102	1.14955e-13
Oxtr	1.70485e-11	0.35571	0.258	0.115	2.65974e-07
Copb2	1.90414e-14	0.352448	0.296	0.124	2.97065e-10
Ssr2	4.47172e-16	0.352406	0.595	0.309	6.97633e-12
Klf6	2.28534e-17	0.35215	0.622	0.327	3.56536e-13
Tpt1-ps3	8.33321e-17	0.351186	0.512	0.252	1.30006e-12
Gm8730	7.62874e-23	0.351146	0.595	0.264	1.19016e-18
Rpl10-ps3	6.0403e-16	0.350312	0.612	0.324	9.42347e-12
Rpl22l1	6.55926e-14	0.349451	0.787	0.489	1.02331e-09
Cd302	3.39698e-25	0.34859	0.302	0.091	5.29963e-21
Socs2	8.21073e-20	0.347548	0.361	0.139	1.28096e-15
Col6a4	1.58358e-21	0.345674	0.763	0.387	2.47055e-17
Gm9385	3.12205e-17	0.344222	0.46	0.212	4.87071e-13
Ubc	4.48378e-20	0.344175	0.976	0.777	6.99515e-16
Socs3	2.15125e-14	0.342494	0.337	0.149	3.35616e-10
Lamb1	7.5135e-17	0.34234	0.292	0.112	1.17218e-12
Erh	1.23516e-17	0.342263	0.505	0.236	1.92697e-13
Tuba1a	5.87737e-17	0.341853	0.746	0.418	9.16929e-13
Rpl9-ps6	1.39005e-14	0.340529	0.399	0.188	2.16861e-10
Gm6204	3.22085e-15	0.338944	0.423	0.202	5.02485e-11
Cdkn1a	4.09061e-22	0.33682	0.474	0.199	6.38177e-18
Flnc	1.73827e-17	0.336805	0.251	0.087	2.71187e-13
Rps15a-ps7	5.15215e-16	0.333988	0.399	0.179	8.03787e-12
Swi5	1.84399e-15	0.333454	0.777	0.459	2.87681e-11
Rpl28-ps1	1.20816e-16	0.331972	0.471	0.223	1.88486e-12
Wsb1	2.27424e-21	0.331787	0.526	0.226	3.54805e-17
Ppic	3.79688e-21	0.331682	0.564	0.247	5.92351e-17
Rpl19-ps11	1.33805e-13	0.331243	0.313	0.139	2.08749e-09
Rbm3	6.96937e-14	0.329979	0.302	0.131	1.08729e-09
Umps	5.38432e-14	0.329288	0.285	0.119	8.40008e-10
Gm13436	6.39445e-21	0.327169	0.505	0.219	9.97598e-17
Wdr89	1.61677e-15	0.326866	0.656	0.346	2.52232e-11
Rpl15	3.39298e-16	0.326579	0.883	0.557	5.29339e-12
Prdx4	3.76389e-16	0.326126	0.357	0.154	5.87204e-12
Copb1	9.61033e-17	0.325961	0.251	0.09	1.49931e-12
Slc16a2	1.70462e-18	0.325861	0.378	0.153	2.65938e-14
Ptma	1.28047e-16	-0.635728	0.773	0.745	1.99766e-12
Gm15427	1.20155e-19	0.324671	0.918	0.591	1.87454e-15
Gapdh	1.38759e-16	0.323592	0.804	0.452	2.16478e-12
S100a1	4.37046e-18	0.323585	0.45	0.198	6.81836e-14
Gm8355	4.84675e-11	0.322709	0.261	0.119	7.56142e-07
Ecm1	2.35935e-19	0.322587	0.316	0.116	3.68083e-15
Hsph1	2.01803e-14	0.32232	0.309	0.131	3.14833e-10
Gm11478	6.4571e-15	0.320296	0.567	0.296	1.00737e-10
Fn1	4.34852e-17	0.319589	0.591	0.297	6.78413e-13
Acaa2	1.16061e-16	0.319536	0.261	0.094	1.81066e-12
Copg1	1.08232e-12	0.31861	0.268	0.115	1.68853e-08
P4ha1	2.64413e-23	0.318067	0.251	0.071	4.12511e-19
Gm11361	6.63837e-16	0.317801	0.842	0.489	1.03565e-11
Ccnl1	2.28094e-14	0.316945	0.491	0.249	3.55849e-10
Gm10123	3.07608e-14	0.316357	0.296	0.125	4.79899e-10
Uba52	1.47925e-18	0.316288	0.749	0.386	2.30777e-14
Tax1bp1	1.87047e-12	0.314804	0.34	0.16	2.91811e-08
C3	7.62146e-22	0.314633	0.299	0.1	1.18902e-17
Myadm	9.68399e-15	0.31422	0.296	0.12	1.5108e-10
Fermt2	1.38486e-15	0.313842	0.296	0.117	2.16052e-11
Ufc1	2.56811e-15	0.313439	0.316	0.133	4.0065e-11
H2-K1	2.43768e-15	-1.02519	0.457	0.552	3.80302e-11
Gna13	9.18186e-18	0.311135	0.271	0.096	1.43246e-13
Eef1a1	9.49951e-18	0.309639	0.969	0.719	1.48202e-13
Fkbp10	1.03148e-21	0.308691	0.278	0.088	1.60921e-17
Tgoln1	2.29624e-14	0.307585	0.344	0.153	3.58237e-10
Surf4	2.60703e-15	0.305945	0.526	0.263	4.06723e-11
Tspan3	2.18722e-18	0.302674	0.368	0.147	3.41228e-14
Tpm1	1.48798e-24	0.302152	0.643	0.289	2.32139e-20
Selenom	2.08986e-19	0.300777	0.512	0.227	3.26038e-15
Atf3	2.00589e-16	0.298319	0.581	0.297	3.12938e-12
Ckap4	7.68027e-15	0.298145	0.333	0.143	1.1982e-10
Sec22b	8.86201e-14	0.298048	0.309	0.134	1.38256e-09
Ddit4l	1.58711e-12	0.29762	0.485	0.259	2.47605e-08
Ran	4.14932e-17	0.295374	0.56	0.266	6.47336e-13
Hspa5	2.58541e-13	0.294752	0.845	0.576	4.03351e-09
Nucb1	3.87141e-15	0.294553	0.381	0.169	6.03978e-11
Aamp	1.99538e-14	0.29327	0.326	0.141	3.11299e-10
Rpl10a-ps1	1.91201e-14	0.293185	0.632	0.335	2.98293e-10
Col4a1	2.14094e-17	0.292893	0.677	0.347	3.34008e-13
Gm5805	2.73089e-15	0.291933	0.77	0.428	4.26045e-11
Rpl37rt	6.36884e-18	0.291063	0.694	0.355	9.93602e-14
Ap2m1	2.46544e-12	0.290539	0.357	0.172	3.84634e-08
Hmgn1	3.22514e-17	0.290377	0.591	0.291	5.03154e-13
Atp5l	7.20927e-14	0.290107	0.357	0.164	1.12472e-09
Mesdc2	7.30813e-19	0.289024	0.302	0.109	1.14014e-14
Gm7536	8.36395e-14	0.289	0.419	0.203	1.30486e-09
Cnn3	6.09954e-15	0.286718	0.433	0.207	9.51589e-11
S100a11	6.56885e-15	0.285228	0.876	0.552	1.02481e-10
Tpm2	1.77215e-20	0.283685	0.591	0.275	2.76474e-16
Tmem167	5.15735e-16	0.282606	0.412	0.187	8.04598e-12
Rpl35	2.00035e-15	0.282492	0.973	0.751	3.12074e-11
Eif4ebp1	1.16615e-15	0.282191	0.371	0.162	1.8193e-11
Gng12	5.76725e-13	0.280331	0.677	0.38	8.99748e-09
Ctsk	9.3024e-24	0.279784	0.457	0.173	1.45127e-19
Rps18-ps3	1.4495e-13	0.279695	0.268	0.11	2.26136e-09
Rps6	2.9474e-14	0.278471	0.873	0.558	4.59823e-10
Jak1	1.55715e-18	0.277969	0.44	0.187	2.42932e-14
Carhsp1	2.78333e-14	0.277628	0.289	0.119	4.34227e-10
Uqcc2	5.78941e-16	0.27468	0.364	0.158	9.03206e-12
Mapre1	3.44484e-15	0.273635	0.426	0.197	5.37429e-11
Stt3a	1.79365e-13	0.271941	0.292	0.125	2.79828e-09
Tpm4	4.05713e-15	0.27163	0.68	0.366	6.32953e-11
9530068E07Rik	9.54699e-15	0.271116	0.268	0.105	1.48943e-10
Selenos	2.02904e-13	0.270565	0.464	0.233	3.16551e-09
Hdlbp	1.81587e-11	0.269838	0.337	0.163	2.83294e-07
Myl6	1.79203e-13	0.269512	0.914	0.617	2.79575e-09
Arl6ip5	2.44169e-13	0.268424	0.388	0.183	3.80928e-09
Gm14303	8.64344e-14	0.267768	0.814	0.474	1.34846e-09
Rpn2	7.66374e-14	0.267698	0.443	0.218	1.19562e-09
Rpl32	3.67759e-13	-0.336226	0.966	0.94	5.7374e-09
Zfp36l1	7.07593e-14	0.267279	0.636	0.353	1.10392e-09
Rps27rt	3.5717e-13	0.266702	0.54	0.285	5.5722e-09
Gm5586	1.31637e-14	0.266526	0.491	0.243	2.05367e-10
Rps13-ps2	5.38938e-11	0.266083	0.443	0.239	8.40798e-07
Rpl11	1.05861e-12	-0.493977	0.78	0.765	1.65154e-08
Klf4	3.93972e-14	0.264847	0.629	0.351	6.14636e-10
Trib1	7.93575e-11	0.263223	0.309	0.148	1.23806e-06
Ehd2	4.80094e-09	0.262194	0.265	0.13	7.48995e-05
Rps21	1.6892e-12	-0.594356	0.773	0.713	2.63533e-08
Hspb8	7.71645e-12	0.25981	0.289	0.128	1.20384e-07
Arl1	7.05482e-14	0.259602	0.399	0.188	1.10062e-09
Gm8430	8.9244e-14	0.259589	0.512	0.259	1.3923e-09
mt-Nd1	2.57422e-12	-0.372162	0.973	0.926	4.01603e-08
Grcc10	3.76117e-12	0.25958	0.258	0.109	5.86781e-08
Sec13	8.47748e-15	0.258966	0.405	0.186	1.32257e-10
Rpn1	1.68228e-12	0.258524	0.399	0.197	2.62453e-08
mt-Nd2	1.1146e-11	-0.45972	0.887	0.81	1.73889e-07
Cttn	1.36021e-14	0.258258	0.261	0.102	2.12207e-10
Nenf	5.08742e-17	0.256692	0.409	0.175	7.93689e-13
Egr1	8.63785e-11	0.255507	0.828	0.532	1.34759e-06
Ist1	2.10186e-12	0.254957	0.258	0.108	3.27911e-08
Cst3	3.73905e-11	-0.991742	0.601	0.615	5.83329e-07
Rps9	4.01779e-11	-0.319386	0.952	0.916	6.26815e-07
Sox4	4.74542e-11	-1.38646	0.189	0.331	7.40332e-07
Loxl1	5.99444e-16	0.254425	0.416	0.184	9.35192e-12
Rpl38-ps2	6.08567e-13	0.2532	0.299	0.131	9.49426e-09
Ubb	2.05003e-21	0.252533	1	0.972	3.19826e-17
Atf5	2.18618e-10	0.252189	0.254	0.116	3.41066e-06
Srgn	8.13676e-11	-0.785301	0.495	0.564	1.26942e-06
Tspo	8.552e-13	0.251812	0.519	0.273	1.3342e-08
Eef1g	1.48137e-11	0.251507	0.787	0.481	2.31108e-07
Jchain	7.41687e-10	-0.622121	0.333	0.171	1.15711e-05
Sap18	2.43347e-09	0.251001	0.399	0.218	3.79646e-05
Gm15772	2.56049e-11	0.250322	0.385	0.195	3.99463e-07
H2-D1	3.58093e-09	-0.826028	0.591	0.571	5.58661e-05
Rpl26	4.19267e-09	-0.34945	0.897	0.827	6.54099e-05
Erp44	3.15309e-09	0.250232	0.302	0.153	4.91914e-05
Rpl38	1.38282e-08	-0.42194	0.825	0.765	0.000215734
Rpl18	1.8615e-08	-0.459089	0.784	0.699	0.000290412
Rpl34	2.01099e-08	-0.361727	0.835	0.759	0.000313735
Npc2	2.30819e-07	-0.723691	0.467	0.504	0.00360101
Tpt1	2.40665e-07	-0.337011	0.832	0.775	0.00375462
Ift20	9.13765e-12	0.250051	0.433	0.225	1.42556e-07
Cfl1	3.31612e-07	-0.358277	0.835	0.732	0.00517348
Rps11	6.8646e-07	-0.290809	0.935	0.84	0.0107095
Apoe	1.26781e-06	-1.42903	0.698	0.643	0.0197791
Ly6e	1.41923e-06	-0.930697	0.433	0.453	0.0221415
Rpl23	2.34294e-06	-0.345153	0.842	0.731	0.0365523
Tyrobp	2.55622e-06	-1.17603	0.172	0.265	0.0398795
Aldh1a2	9.92981e-06	-0.943167	0.296	0.353	0.154915
Cyba	2.1377e-05	-0.786449	0.306	0.36	0.333503
Fau	2.53014e-05	-0.352647	0.749	0.665	0.394727
Rps5	0.000109943	-0.265411	0.859	0.766	1
Tmem176b	0.000144151	-0.82456	0.22	0.284	1
Rps24	0.000215634	-0.281929	0.859	0.752	1
Igfbp7	0.000250243	-0.479029	0.921	0.743	1
Gpx1	0.000316027	-0.293495	0.873	0.759	1
Rpl30	0.000478016	-0.331805	0.78	0.675	1
Sprr2f	0.000688111	-0.788663	0.278	0.168	1
Hspb1	0.000810081	-1.02313	0.251	0.308	1
Mif	0.000820691	-0.510468	0.519	0.511	1
Igfbp4	0.00086888	-0.702532	0.323	0.352	1
Fcer1g	0.000986792	-1.04101	0.227	0.274	1
Malat1	0.000991628	-0.679765	0.375	0.392	1
Cox4i1	0.00116629	-0.271784	0.797	0.698	1
Itm2b	0.00192788	-0.270986	0.863	0.759	1
Lyz2	0.00203353	-1.86116	0.306	0.328	1
Rpl22	0.0026157	-0.42415	0.646	0.56	1
Arpc3	0.00280392	-0.574533	0.381	0.384	1
H2-Ab1	0.00292644	-1.86514	0.299	0.329	1
Ifitm3	0.00304065	-0.425522	0.887	0.76	1
Ctla2a	0.00531092	-0.629592	0.481	0.48	1
Selenop	0.00715571	-0.862303	0.399	0.381	1
Crispld2	0.00879236	-0.658811	0.371	0.364	1
Tcf4	0.0105533	-0.625792	0.22	0.251	1
Hes1	0.0126593	-0.542724	0.443	0.458	1
Rpl17	0.0139244	-0.258938	0.78	0.66	1
Maf	0.0155736	-0.252145	0.55	0.361	1
Plac8	0.0162598	-0.608056	0.292	0.311	1
Rhob	0.0168512	-0.506483	0.247	0.28	1
Nbl1	0.0197867	-0.949	0.498	0.427	1
Grn	0.0210817	-0.649964	0.223	0.251	1
Id3	0.0233125	-0.669043	0.33	0.342	1
Htra1	0.0238852	-0.273188	0.622	0.403	1
Rps27l	0.0241829	-0.382898	0.505	0.463	1
Mylk	0.0266356	-0.331065	0.388	0.276	1
Hsp90ab1	0.0297521	-0.251551	0.784	0.65	1
Fbln2	0.0375926	-0.282019	0.474	0.326	1
Serinc3	0.0383583	-0.647227	0.261	0.27	1
Rpl36a	0.0400392	-0.267341	0.746	0.631	1
Gpx3	0.0486086	-0.515489	0.873	0.696	1
Ctsz	0.0524368	-0.250379	0.368	0.262	1
Ndufa6	0.0588385	-0.439626	0.333	0.334	1
Cox6c	0.0781526	-0.300116	0.756	0.621	1
Cd74	0.0883052	-2.39649	0.364	0.337	1
Capzb	0.120392	-0.420432	0.43	0.386	1
Calm1	0.12813	-0.279249	0.863	0.686	1
Atp6v1f	0.130878	-0.447588	0.344	0.324	1
Mdk	0.135594	-0.802302	0.405	0.347	1
1810058I24Rik	0.140165	-0.308543	0.261	0.194	1
Atpif1	0.1628	-0.388837	0.495	0.429	1
Lsp1	0.192824	-0.272018	0.711	0.515	1
Marcksl1	0.205148	-0.25565	0.357	0.274	1
Zfas1	0.217959	-0.26938	0.354	0.272	1
Uqcrh	0.219459	-0.274501	0.584	0.5	1
Rabac1	0.220198	-0.287059	0.378	0.283	1
Timp2	0.223862	-0.323992	0.512	0.371	1
mt-Nd5	0.24125	-0.292036	0.643	0.517	1
Sub1	0.267095	-0.440388	0.502	0.427	1
Rnase4	0.271433	-0.270018	0.759	0.546	1
Prdx6	0.280989	-0.296504	0.292	0.227	1
Tmem256	0.287449	-0.322462	0.313	0.24	1
Mgp	0.295624	-1.38749	0.704	0.471	1
Ctsd	0.31135	-0.514543	0.416	0.368	1
Tomm7	0.313009	-0.289563	0.361	0.276	1
Atp1b3	0.337428	-0.283397	0.261	0.207	1
Son	0.366469	-0.309081	0.581	0.474	1
Mmp14	0.370877	-0.745529	0.598	0.466	1
Mfap4	0.37501	-0.371974	0.436	0.329	1
Zbtb20	0.380635	-0.326503	0.302	0.237	1
Aebp1	0.46183	-0.27948	0.832	0.61	1
Atox1	0.485385	-0.289541	0.481	0.37	1
Rsrp1	0.519551	-0.353257	0.254	0.24	1
Ndufb9	0.53053	-0.290644	0.436	0.34	1
Rab11a	0.546756	-0.256648	0.275	0.229	1
Ramp2	0.557029	-0.41729	0.426	0.354	1
Tpm3	0.557364	-0.256328	0.275	0.227	1
Atp6v0b	0.571536	-0.327246	0.251	0.207	1
Mmp2	0.608567	-0.690927	0.43	0.346	1
Ctsl	0.609999	-0.257867	0.79	0.598	1
Pcbp1	0.610862	-0.278628	0.416	0.328	1
Ier3	0.68146	-0.622546	0.464	0.38	1
Cox5a	0.68269	-0.310722	0.481	0.362	1
Eif3k	0.709712	-0.268293	0.474	0.372	1
Tsc22d1	0.723406	-0.425532	0.488	0.389	1
Id2	0.801298	-0.352426	0.275	0.238	1
Hsd11b2	0.814796	-0.450075	0.375	0.3	1
Eif3f	0.820638	-0.369247	0.375	0.314	1
Ifi27	0.832651	-0.266617	0.292	0.251	1
Hsp90aa1	0.840884	-0.260754	0.663	0.499	1
Shisa5	0.849122	-0.349798	0.275	0.239	1
Ccl6	0.855292	-0.606709	0.268	0.234	1
Gnai2	0.858705	-0.40434	0.371	0.312	1
P2ry14	0.869222	-0.442569	0.333	0.285	1
Ramp3	0.870905	-0.399051	0.412	0.335	1
Atp5k	0.88883	-0.271575	0.464	0.368	1
Ndufb8	0.892451	-0.320992	0.282	0.241	1
Sh3bgrl3	0.894507	-0.345883	0.409	0.343	1
Tbca	0.951864	-0.310783	0.299	0.257	1

## Sheet: 5 macrophage
Table S2: Representative genes of each cell cluster
	p_val	avg_logFC	pct.1	pct.2	p_val_adj
C1qc	0	3.51436	0.913	0.036	0
C1qa	0	3.13117	0.906	0.085	0
Ctss	0	2.72783	0.929	0.087	0
Ms4a7	0	2.59822	0.61	0.01	0
C1qb	1.13609e-284	3.12982	0.925	0.126	1.77241e-280
Csf1r	8.15039e-252	2.0337	0.543	0.025	1.27154e-247
Cd68	2.96478e-223	2.13869	0.642	0.054	4.62536e-219
Fcrls	1.10111e-212	1.78711	0.37	0.009	1.71784e-208
Pf4	1.48793e-212	2.11551	0.406	0.013	2.32132e-208
Wfdc17	1.09745e-211	2.36968	0.602	0.049	1.71213e-207
Adgre1	4.37485e-211	1.76527	0.402	0.013	6.8252e-207
Lyz2	2.15565e-206	2.91421	0.992	0.278	3.36303e-202
C3ar1	1.4502e-199	1.7018	0.417	0.017	2.26245e-195
Ms4a6c	4.10522e-183	1.7575	0.535	0.042	6.40455e-179
Ccl12	4.29918e-179	2.00243	0.323	0.009	6.70715e-175
Mpeg1	2.12751e-177	1.94443	0.484	0.035	3.31912e-173
Trf	3.7952e-175	1.76384	0.449	0.028	5.92089e-171
Ccl4	4.02698e-174	2.3047	0.642	0.077	6.2825e-170
Mrc1	4.02867e-167	1.65242	0.283	0.006	6.28512e-163
Fcgr2b	1.47366e-163	1.64027	0.386	0.02	2.29906e-159
Ctsc	1.21135e-156	2.15742	0.598	0.078	1.88983e-152
Ccl3	1.68391e-154	2.19228	0.638	0.091	2.62707e-150
Ly86	1.60349e-153	1.42948	0.354	0.017	2.5016e-149
Fcer1g	4.3036e-149	1.9007	0.87	0.227	6.71405e-145
H2-Aa	6.78988e-146	1.98371	0.76	0.148	1.05929e-141
H2-Eb1	6.18834e-143	1.99727	0.724	0.134	9.65443e-139
Lgmn	2.85158e-142	1.9372	0.626	0.098	4.44876e-138
Apoe	3.83068e-140	2.89844	0.98	0.623	5.97625e-136
Cd74	6.07023e-138	2.05085	0.917	0.297	9.47017e-134
Aif1	1.84434e-135	1.76158	0.5	0.057	2.87736e-131
Fcgr1	1.02157e-131	1.38117	0.299	0.014	1.59375e-127
Trem2	9.41866e-128	1.74866	0.441	0.046	1.46941e-123
Pld4	1.45619e-127	1.48979	0.382	0.03	2.2718e-123
Ms4a6d	2.06174e-125	1.15163	0.26	0.01	3.21651e-121
Cybb	3.63995e-124	1.68457	0.5	0.063	5.67868e-120
Gm6377	1.62135e-121	1.46646	0.299	0.017	2.52947e-117
Tyrobp	9.83834e-121	1.56091	0.823	0.216	1.53488e-116
Tmsb4x	8.14582e-119	1.0998	1	0.988	1.27083e-114
Unc93b1	2.27599e-118	1.70253	0.461	0.056	3.55077e-114
Lst1	6.1777e-117	1.60158	0.429	0.047	9.63783e-113
Ctsb	8.27891e-117	1.59783	0.965	0.669	1.29159e-112
Fcgr3	9.48158e-116	1.46474	0.362	0.031	1.47922e-111
Ucp2	1.14659e-108	1.64432	0.559	0.1	1.78879e-104
Clec12a	1.76633e-107	1.25743	0.252	0.013	2.75565e-103
Fth1	8.37124e-107	1.07931	1	0.959	1.306e-102
Laptm5	4.48e-105	1.51536	0.587	0.108	6.98925e-101
Rgs10	1.09972e-99	1.45366	0.382	0.044	1.71568e-95
Stab1	1.38217e-97	1.40069	0.291	0.023	2.15632e-93
Hexb	4.21258e-97	1.54728	0.476	0.075	6.57205e-93
H2-Ab1	2.40319e-95	1.76603	0.803	0.292	3.74921e-91
Ctsd	1.83468e-94	1.77783	0.811	0.34	2.86228e-90
Bcl2a1b	2.39527e-90	1.3058	0.287	0.024	3.73686e-86
Grn	5.84985e-89	1.55653	0.701	0.216	9.12635e-85
B2m	8.32237e-89	1.03301	0.996	0.873	1.29837e-84
Lilrb4a	1.1108e-86	1.31258	0.429	0.064	1.73297e-82
Cd14	4.83288e-85	1.45454	0.378	0.051	7.53977e-81
Tmsb10	1.02722e-84	-1.24098	0.657	0.94	1.60257e-80
Spi1	2.09819e-81	1.249	0.311	0.034	3.27339e-77
Cfp	2.96817e-80	1.38473	0.311	0.035	4.63064e-76
Tlr2	2.36279e-77	1.18196	0.26	0.024	3.68619e-73
Sparc	3.7856e-76	-1.89584	0.433	0.859	5.90591e-72
Selenop	6.56428e-76	1.78169	0.783	0.354	1.02409e-71
Dcn	4.18512e-74	-2.29564	0.417	0.824	6.5292e-70
Ctsz	2.7094e-71	1.3786	0.677	0.241	4.22693e-67
Cxcl2	1.90592e-68	1.67537	0.559	0.155	2.97342e-64
Ighm	4.64565e-68	1.17963	0.26	0.028	7.24767e-64
H2-DMa	5.24824e-68	1.29631	0.287	0.035	8.18778e-64
Igfbp7	1.21357e-67	-1.89789	0.303	0.789	1.89329e-63
Cd52	9.30893e-67	1.18358	0.634	0.185	1.45229e-62
Ms4a6b	2.29576e-66	1.14802	0.252	0.027	3.58161e-62
Psap	1.7857e-65	1.28906	0.799	0.402	2.78588e-61
Mafb	1.4095e-64	1.19564	0.339	0.053	2.19896e-60
Lcp1	1.22037e-63	1.12322	0.398	0.075	1.9039e-59
Cd53	2.00879e-63	1.24588	0.406	0.079	3.13392e-59
Sdc3	2.44107e-63	1.06292	0.276	0.035	3.80831e-59
Ptpn18	3.94319e-60	1.10804	0.362	0.066	6.15176e-56
Ftl1	7.25338e-60	0.752256	0.976	0.892	1.1316e-55
Cst3	5.56716e-59	0.906326	0.913	0.592	8.68533e-55
Col1a2	5.8925e-58	-2.05003	0.291	0.735	9.1929e-54
Sirpa	1.94499e-56	1.19625	0.283	0.044	3.03437e-52
H2-DMb1	4.21817e-55	1.26139	0.264	0.038	6.58077e-51
Col1a1	4.44554e-55	-2.21906	0.272	0.703	6.93549e-51
H2-K1	6.54237e-55	1.01441	0.878	0.52	1.02068e-50
H2-D1	1.47867e-54	0.896396	0.878	0.551	2.30687e-50
Ccrl2	3.66418e-54	1.26855	0.303	0.052	5.71649e-50
Cyba	4.89311e-53	1.17061	0.713	0.33	7.63375e-49
Col3a1	6.08354e-53	-2.25923	0.181	0.652	9.49093e-49
Serpinh1	2.37647e-51	-1.85982	0.189	0.652	3.70753e-47
Rgs1	1.28476e-50	1.11543	0.382	0.084	2.00436e-46
Ctsh	1.12577e-48	1.18597	0.634	0.273	1.75631e-44
Alox5ap	2.44519e-48	1.08918	0.382	0.091	3.81475e-44
Cd83	1.44173e-47	1.03742	0.362	0.081	2.24925e-43
Dab2	2.01463e-46	1.12551	0.311	0.064	3.14302e-42
Col6a1	1.21577e-45	-2.06356	0.173	0.602	1.89672e-41
Ctsa	4.09404e-45	1.1082	0.488	0.157	6.38711e-41
Hexa	6.96641e-45	1.12406	0.472	0.148	1.08683e-40
Lgals3	8.25278e-45	1.42431	0.642	0.309	1.28752e-40
Itm2b	3.65405e-44	0.907016	0.882	0.759	5.70068e-40
Ifi27l2a	1.00399e-40	1.08846	0.661	0.319	1.56632e-36
Pltp	4.92508e-40	1.05444	0.555	0.205	7.68361e-36
Col6a2	1.67246e-39	-1.65836	0.272	0.635	2.60921e-35
Plin2	5.66169e-39	1.11515	0.488	0.18	8.83281e-35
Prss23	2.10786e-38	-1.82416	0.098	0.522	3.28848e-34
mt-Cytb	2.7174e-38	-0.631106	0.89	0.967	4.23942e-34
Ly6e	2.82506e-38	0.858102	0.752	0.429	4.40738e-34
Aebp1	2.84958e-38	-1.39226	0.248	0.655	4.44563e-34
Ccl9	4.10746e-38	1.11852	0.287	0.065	6.40805e-34
Cyr61	6.27433e-38	-2.11774	0.055	0.483	9.78859e-34
Coro1a	9.85548e-37	0.919604	0.339	0.087	1.53755e-32
Rps18	5.98194e-36	-0.757829	0.598	0.833	9.33243e-32
Rpl13	1.07326e-35	-0.483302	0.894	0.979	1.67439e-31
Lipa	2.42502e-35	0.951148	0.268	0.06	3.78328e-31
Tmem176b	4.99913e-35	0.911416	0.594	0.256	7.79915e-31
Ccl6	7.12269e-35	0.932671	0.52	0.216	1.11121e-30
Lilr4b	8.29951e-35	0.912429	0.307	0.076	1.29481e-30
Ccl8	2.99289e-34	2.18435	0.398	0.145	4.66921e-30
Gsn	3.08057e-34	-1.45625	0.256	0.605	4.80599e-30
S100a11	6.75893e-34	-1.16485	0.201	0.605	1.05446e-29
Col6a3	3.26995e-33	-1.81553	0.11	0.49	5.10144e-29
Lum	5.84699e-33	-1.65043	0.161	0.535	9.12188e-29
Cotl1	3.03096e-32	0.988003	0.508	0.215	4.7286e-28
Gadd45g	4.81426e-32	-1.48075	0.378	0.662	7.51072e-28
Serinc3	1.74568e-31	1.11652	0.524	0.251	2.72344e-27
Dpt	1.78312e-31	-1.49914	0.063	0.458	2.78185e-27
Rplp0	1.91961e-31	-0.606962	0.709	0.865	2.99479e-27
Rps19	5.30024e-31	-0.518731	0.827	0.94	8.26891e-27
Fstl1	1.09964e-30	-1.45741	0.114	0.485	1.71555e-26
Il1b	7.43314e-30	1.00938	0.295	0.081	1.15964e-25
Col6a4	1.25114e-29	-1.76666	0.087	0.44	1.95191e-25
Rpl4	5.90348e-29	-0.649393	0.583	0.803	9.21003e-25
Sdcbp	1.16481e-28	0.95386	0.567	0.305	1.81722e-24
Rpl41	1.26372e-28	-0.394911	0.949	0.98	1.97154e-24
Sat1	3.40906e-27	0.922285	0.587	0.312	5.31848e-23
Ninj1	5.07659e-27	0.862388	0.35	0.12	7.91999e-23
Mfap5	3.15492e-26	-1.28158	0.165	0.497	4.92199e-22
Nedd4	4.89899e-26	-1.38989	0.039	0.376	7.64292e-22
Clta	5.71376e-26	0.852237	0.539	0.278	8.91404e-22
Nbl1	8.33405e-26	-1.55861	0.11	0.456	1.3002e-21
Plek	1.19468e-25	0.724643	0.268	0.073	1.86383e-21
Ifi30	1.4359e-25	0.789643	0.287	0.085	2.24015e-21
S100a6	1.62811e-25	-0.947242	0.283	0.603	2.54002e-21
Sh3bgrl3	1.86895e-25	0.752389	0.598	0.33	2.91575e-21
S100a10	2.24164e-25	-1.03591	0.197	0.535	3.49718e-21
Gm11361	2.36058e-25	-1.06903	0.213	0.538	3.68274e-21
Crispld2	2.99933e-25	-1.49014	0.059	0.387	4.67925e-21
Ehd4	4.99017e-25	0.854797	0.252	0.071	7.78517e-21
Gm10736	5.26989e-25	-0.909972	0.386	0.649	8.22155e-21
Laptm4a	1.02868e-24	-0.872502	0.402	0.678	1.60485e-20
Htra1	1.23535e-24	-1.41519	0.126	0.441	1.92727e-20
Blvrb	1.44494e-24	0.811372	0.268	0.08	2.25426e-20
Ogn	1.50614e-24	-1.4308	0.087	0.406	2.34973e-20
Tuba1a	2.02371e-24	-1.22991	0.142	0.465	3.1572e-20
Eef1a1	2.20826e-24	-0.7362	0.571	0.751	3.44511e-20
Tmem176a	2.67303e-24	0.94049	0.402	0.166	4.17019e-20
Arpc2	3.01562e-24	0.704368	0.657	0.408	4.70468e-20
Col4a1	3.33102e-24	-1.33664	0.075	0.395	5.19672e-20
Creg1	5.8726e-24	0.905703	0.323	0.113	9.16184e-20
Cd34	7.54332e-24	-1.2467	0.106	0.427	1.17683e-19
Rps3a1	1.4656e-23	-0.52379	0.665	0.858	2.28648e-19
Rps14	2.27698e-23	-0.388696	0.898	0.959	3.55232e-19
Mmp14	2.91156e-23	-1.35834	0.169	0.499	4.54233e-19
Calm1	3.2581e-23	0.552742	0.827	0.691	5.08295e-19
Ramp2	3.56674e-23	-1.3525	0.071	0.381	5.56447e-19
Serping1	3.58424e-23	-1.3439	0.067	0.386	5.59177e-19
Sparcl1	3.96028e-23	-1.53487	0.11	0.425	6.17844e-19
Fbln2	6.16495e-23	-1.63679	0.059	0.357	9.61793e-19
Anxa2	1.42237e-22	-0.997316	0.264	0.544	2.21904e-18
Gas5	1.56397e-22	-0.774738	0.362	0.674	2.43994e-18
Gm15427	1.73702e-22	-0.90366	0.409	0.631	2.70992e-18
Lsp1	2.15271e-22	-1.00633	0.228	0.552	3.35844e-18
Egr1	6.43703e-22	-0.85299	0.272	0.575	1.00424e-17
Gnas	7.07339e-22	-0.833005	0.299	0.604	1.10352e-17
Gpx8	9.91239e-22	-1.20602	0.047	0.344	1.54643e-17
Igfbp6	1.10841e-21	-1.03243	0.213	0.508	1.72924e-17
Rgs2	4.12636e-21	0.751223	0.39	0.162	6.43754e-17
Tpd52	4.25993e-21	0.831913	0.252	0.08	6.64592e-17
Rpl22l1	4.52593e-21	-0.892197	0.22	0.533	7.06091e-17
Serpinf1	7.27575e-21	-1.16851	0.063	0.354	1.13509e-16
mt-Co1	9.51758e-21	-0.498799	0.764	0.878	1.48484e-16
Hsd11b2	1.41494e-20	-1.65784	0.051	0.325	2.20744e-16
Kctd12	1.77975e-20	0.761387	0.299	0.108	2.77658e-16
Mdk	2.58216e-20	-1.39977	0.083	0.371	4.02843e-16
Id2	3.2011e-20	0.916004	0.449	0.226	4.99404e-16
Klf9	5.05676e-20	-1.36029	0.043	0.314	7.88904e-16
Rnaset2a	1.00997e-19	0.850867	0.362	0.158	1.57565e-15
Raly	2.21805e-19	-0.930399	0.283	0.541	3.46037e-15
Rarres2	5.08322e-19	-1.00365	0.181	0.469	7.93033e-15
Rac2	5.5097e-19	0.679447	0.26	0.087	8.59568e-15
Rpl10a	6.15453e-19	-0.719415	0.331	0.608	9.60169e-15
Lgals3bp	6.20436e-19	0.758851	0.421	0.203	9.67943e-15
Ppic	8.09316e-19	-1.18386	0.031	0.289	1.26261e-14
Rap1b	8.24399e-19	0.812608	0.421	0.208	1.28615e-14
Akr1a1	1.0106e-18	0.679914	0.591	0.384	1.57664e-14
Myl12a	1.1105e-18	-0.735031	0.299	0.592	1.7325e-14
Psmb8	1.11996e-18	0.720194	0.339	0.138	1.74725e-14
Adh1	1.39656e-18	-1.24294	0.205	0.476	2.17877e-14
Aldh1a2	1.60373e-18	-1.40707	0.106	0.366	2.50198e-14
Rpl18a	2.03701e-18	-0.333337	0.949	0.96	3.17793e-14
Snx2	2.21879e-18	0.958856	0.26	0.097	3.46153e-14
Tsc22d1	2.33449e-18	-1.06352	0.138	0.415	3.64204e-14
Il1rn	4.66563e-18	0.764734	0.264	0.094	7.27884e-14
Rps2	4.8495e-18	-0.434821	0.717	0.861	7.5657e-14
Ccl11	5.05717e-18	-1.59131	0.012	0.251	7.88968e-14
Rps7	6.66922e-18	-0.458763	0.701	0.854	1.04046e-13
Plpp3	6.93774e-18	-1.18648	0.047	0.304	1.08236e-13
Ltbp4	6.98925e-18	-1.1582	0.055	0.312	1.09039e-13
Col5a1	7.29266e-18	-1.2274	0.047	0.293	1.13773e-13
Prkcdbp	7.58604e-18	-1.04959	0.055	0.313	1.1835e-13
Spon1	8.21568e-18	-1.20271	0.031	0.279	1.28173e-13
Cxcl16	8.91145e-18	0.862033	0.35	0.159	1.39028e-13
Rpl23a	1.05679e-17	-0.453342	0.63	0.826	1.64869e-13
Lgals1	1.19994e-17	-0.517872	0.752	0.854	1.87203e-13
Fn1	1.74092e-17	-1.07822	0.079	0.337	2.71601e-13
Ddit4l	1.92163e-17	-1.28439	0.047	0.293	2.99794e-13
Col4a2	2.11856e-17	-1.19143	0.035	0.278	3.30517e-13
Eef1g	2.29206e-17	-0.759028	0.256	0.523	3.57584e-13
Adamts1	2.5425e-17	-1.27661	0.059	0.314	3.96655e-13
Rpl37	2.65035e-17	-0.39605	0.787	0.903	4.13482e-13
Spon2	2.83849e-17	-1.02316	0.146	0.405	4.42832e-13
Mfap2	3.14069e-17	-1.24335	0.043	0.291	4.89979e-13
Atp6ap2	3.77397e-17	0.786118	0.28	0.112	5.88777e-13
Gm13588	9.66184e-17	-1.03534	0.028	0.263	1.50734e-12
Rpl35	9.82427e-17	-0.495855	0.614	0.779	1.53268e-12
Col5a2	1.25488e-16	-1.14607	0.028	0.259	1.95774e-12
Rnase4	1.29284e-16	-0.886275	0.335	0.579	2.01695e-12
Rps6	1.29471e-16	-0.722996	0.378	0.597	2.01987e-12
Errfi1	1.47725e-16	-1.29878	0.106	0.344	2.30466e-12
Ramp3	1.83898e-16	-1.17652	0.11	0.358	2.869e-12
Htra3	3.38594e-16	-1.17261	0.031	0.264	5.28241e-12
Cd164	7.11382e-16	-0.940331	0.173	0.417	1.10983e-11
Mfap4	9.27097e-16	-1.01552	0.106	0.354	1.44636e-11
Rpl3	1.05587e-15	-0.45675	0.594	0.782	1.64727e-11
Rbp1	1.45094e-15	-1.21612	0.071	0.305	2.26362e-11
Snhg18	1.52093e-15	-1.06762	0.031	0.256	2.3728e-11
Snx5	1.55961e-15	0.80401	0.346	0.167	2.43315e-11
Rcn3	3.52483e-15	-0.888211	0.146	0.389	5.49909e-11
Npc2	4.17205e-15	0.57742	0.673	0.489	6.50882e-11
Gm2000	5.03742e-15	-0.626101	0.398	0.62	7.85887e-11
Mmp2	5.62138e-15	-1.16791	0.13	0.369	8.76991e-11
Capza2	1.01932e-14	0.794509	0.366	0.19	1.59025e-10
Lamp1	1.06144e-14	0.65578	0.551	0.363	1.65595e-10
Arf4	1.09727e-14	-0.785817	0.165	0.416	1.71184e-10
Lpl	1.41692e-14	0.553504	0.295	0.123	2.21054e-10
Ctla2a	1.46123e-14	-1.18299	0.26	0.496	2.27966e-10
Vamp8	2.18957e-14	0.684153	0.346	0.172	3.41595e-10
Cald1	2.27242e-14	-0.912055	0.098	0.335	3.5452e-10
Sox4	2.35607e-14	-1.19137	0.106	0.336	3.67571e-10
Maged1	3.62849e-14	-0.851832	0.075	0.303	5.66081e-10
Tnfaip6	3.93872e-14	-1.22469	0.043	0.251	6.1448e-10
Tpm1	4.10437e-14	-0.938721	0.098	0.333	6.40323e-10
Ier2	1.13631e-13	-0.759439	0.256	0.49	1.77275e-09
Rpl15	1.19663e-13	-0.538145	0.366	0.598	1.86687e-09
Asah1	1.24939e-13	0.718939	0.272	0.12	1.94917e-09
Rps28	1.34644e-13	-0.3998	0.673	0.848	2.10058e-09
Tpm2	1.43758e-13	-0.935841	0.094	0.315	2.24277e-09
Actg1	1.61182e-13	-0.585954	0.488	0.655	2.5146e-09
Eef2	1.72332e-13	-0.486363	0.531	0.725	2.68856e-09
Gng12	1.72945e-13	-0.882069	0.201	0.417	2.69811e-09
P2ry14	1.73063e-13	-1.16582	0.094	0.303	2.69995e-09
Rps27	2.1617e-13	-0.297194	0.929	0.972	3.37246e-09
Gm10076	2.59063e-13	-0.712718	0.244	0.472	4.04164e-09
Lox	2.62889e-13	-0.928338	0.071	0.281	4.10133e-09
Myl6	2.68886e-13	-0.549842	0.445	0.654	4.1949e-09
Cfl1	2.69943e-13	0.424455	0.811	0.735	4.21138e-09
Tpm4	2.86699e-13	-0.75743	0.177	0.406	4.4728e-09
Hmox1	3.29343e-13	0.780381	0.346	0.182	5.13808e-09
Adamts2	3.40468e-13	-0.952169	0.063	0.267	5.31164e-09
Selenom	3.44232e-13	-0.893021	0.055	0.263	5.37037e-09
Rpl10a-ps1	6.52151e-13	-0.700637	0.142	0.374	1.01742e-08
Eef1b2	6.91954e-13	-0.587526	0.248	0.491	1.07952e-08
Calu	7.98231e-13	-0.862005	0.079	0.285	1.24532e-08
Gm5805	8.25176e-13	-0.69003	0.252	0.469	1.28736e-08
Rps26	8.8359e-13	-0.322125	0.787	0.886	1.37849e-08
Rps29	1.29111e-12	0.292207	0.965	0.946	2.01426e-08
Slc25a4	1.37702e-12	-0.686212	0.22	0.447	2.1483e-08
Bgn	1.40032e-12	-0.895629	0.067	0.272	2.18464e-08
Osr2	2.47216e-12	-0.944643	0.067	0.266	3.85681e-08
Plac8	3.11634e-12	-0.587317	0.106	0.325	4.8618e-08
Gm8730	3.47101e-12	-0.839742	0.102	0.304	5.41512e-08
Cd63	4.08646e-12	-0.407944	0.728	0.825	6.37528e-08
Rbpms	4.61154e-12	-0.868489	0.059	0.252	7.19446e-08
Klf2	4.85521e-12	0.740564	0.327	0.168	7.57461e-08
Rab7b	4.8929e-12	0.764192	0.256	0.119	7.63342e-08
Actr3	5.17436e-12	0.620388	0.398	0.231	8.07252e-08
Csrp1	5.17701e-12	-0.862079	0.071	0.267	8.07665e-08
Ppib	6.80437e-12	-0.56702	0.232	0.459	1.06155e-07
Cdkn1a	6.80614e-12	0.713025	0.374	0.209	1.06183e-07
Rps6-ps4	7.32035e-12	-0.790335	0.181	0.383	1.14205e-07
mt-Nd2	7.62455e-12	-0.422456	0.657	0.828	1.18951e-07
Emp1	7.83232e-12	-0.919967	0.13	0.332	1.22192e-07
Rpl6	9.61769e-12	-0.454977	0.492	0.697	1.50046e-07
Gstm1	9.82286e-12	-0.804884	0.098	0.302	1.53246e-07
Atf3	1.10857e-11	0.672972	0.472	0.308	1.72948e-07
Cd63-ps	1.47097e-11	-0.839801	0.197	0.388	2.29486e-07
Anxa1	1.60843e-11	-0.828874	0.157	0.361	2.50931e-07
Sec62	1.61954e-11	-0.677242	0.236	0.451	2.52664e-07
Mfge8	2.37271e-11	-0.790199	0.067	0.257	3.70167e-07
Rpl37rt	2.40759e-11	-0.669353	0.189	0.395	3.75608e-07
Nfkbiz	2.8994e-11	0.768314	0.264	0.129	4.52335e-07
Rpl14	3.59596e-11	-0.345594	0.709	0.835	5.61005e-07
Gpx3	3.68507e-11	-0.930668	0.543	0.722	5.74908e-07
Rps15	3.74058e-11	-0.421954	0.575	0.738	5.83567e-07
Cyb5a	4.22815e-11	-0.583126	0.193	0.41	6.59633e-07
Zbtb20	4.85396e-11	-0.80907	0.067	0.254	7.57266e-07
Lmna	5.21934e-11	-0.703964	0.091	0.287	8.1427e-07
Uba52	5.26744e-11	-0.674224	0.224	0.427	8.21773e-07
Myl9	6.14469e-11	-0.82597	0.165	0.369	9.58632e-07
Rps26-ps1	6.3321e-11	-0.644919	0.094	0.288	9.87871e-07
H3f3b	6.79229e-11	0.348639	0.878	0.826	1.05967e-06
Gm1821	6.89658e-11	-0.63458	0.264	0.467	1.07593e-06
Map1lc3a	7.32567e-11	-0.645208	0.165	0.375	1.14288e-06
Rps5	7.84744e-11	-0.361324	0.598	0.786	1.22428e-06
Id3	8.347e-11	-0.791785	0.154	0.355	1.30222e-06
Rpl3-ps1	1.02464e-10	-0.678243	0.154	0.353	1.59855e-06
Scd2	1.12656e-10	-0.734405	0.071	0.251	1.75754e-06
Mcl1	1.17788e-10	0.620221	0.315	0.168	1.83761e-06
Mylk	1.21296e-10	-0.965836	0.106	0.298	1.89234e-06
Gnai2	1.51647e-10	0.547896	0.472	0.306	2.36585e-06
Gm5905	1.69057e-10	-0.578939	0.154	0.354	2.63747e-06
Cstb	2.33469e-10	0.591089	0.52	0.381	3.64235e-06
Zfp36	2.79838e-10	0.458117	0.598	0.451	4.36576e-06
Pabpc1	3.60752e-10	-0.461509	0.417	0.61	5.6281e-06
Rps15a	4.40578e-10	-0.357618	0.657	0.83	6.87346e-06
M6pr	4.67684e-10	0.611338	0.295	0.158	7.29633e-06
Arpc1b	5.00344e-10	0.513399	0.579	0.454	7.80587e-06
P4hb	5.54799e-10	-0.561907	0.28	0.472	8.65541e-06
Rpl36a	7.71367e-10	-0.445941	0.476	0.652	1.20341e-05
Morf4l2	7.81577e-10	-0.573837	0.102	0.287	1.21934e-05
Bhlhe40	7.90254e-10	-0.63161	0.094	0.275	1.23288e-05
Fosb	8.40787e-10	-0.746755	0.291	0.461	1.31171e-05
Cd81	8.84726e-10	-0.573396	0.232	0.428	1.38026e-05
Hes1	9.25541e-10	-0.859866	0.28	0.47	1.44394e-05
Rpl18-ps1	1.16229e-09	-0.63	0.087	0.26	1.81329e-05
Rps17	1.21689e-09	-0.424143	0.512	0.699	1.89848e-05
Rpl36	1.26154e-09	-0.293328	0.713	0.845	1.96812e-05
Gm11478	1.38554e-09	-0.642706	0.146	0.33	2.16158e-05
Tcf4	1.40877e-09	-0.75929	0.091	0.26	2.19782e-05
Rps23	1.41638e-09	-0.283098	0.728	0.848	2.20969e-05
Rps23-ps1	1.44286e-09	-0.615946	0.146	0.329	2.25101e-05
Rps19-ps6	1.4866e-09	-0.617762	0.146	0.331	2.31925e-05
Rps27rt	1.62692e-09	-0.596513	0.134	0.318	2.53816e-05
Swi5	1.89591e-09	-0.486448	0.303	0.497	2.9578e-05
Ier3	2.93119e-09	0.395043	0.535	0.375	4.57296e-05
Rpl9	3.05919e-09	-0.394221	0.504	0.68	4.77264e-05
Ccl2	3.88826e-09	0.305798	0.429	0.259	6.06608e-05
Thbs1	4.27223e-09	-0.70483	0.146	0.33	6.66511e-05
mt-Nd4	4.37788e-09	-0.373111	0.854	0.915	6.82993e-05
Nupr1	4.45239e-09	-0.630897	0.146	0.324	6.94618e-05
Rpl19	5.15623e-09	-0.347583	0.516	0.683	8.04423e-05
Cox6c	6.12682e-09	-0.53055	0.48	0.642	9.55845e-05
Rps16-ps2	6.39471e-09	-0.481426	0.315	0.507	9.97639e-05
Prkar1a	6.77325e-09	-0.59848	0.142	0.318	0.000105669
Chchd10	6.86657e-09	-1.14497	0.13	0.288	0.000107125
Minos1	7.29613e-09	-0.480611	0.315	0.509	0.000113827
Rpl14-ps1	7.46303e-09	-0.546142	0.118	0.295	0.000116431
mt-Nd5	7.91143e-09	-0.493901	0.358	0.539	0.000123426
Tceal9	8.01823e-09	-0.496155	0.335	0.519	0.000125092
Pfn1	1.59587e-08	0.399613	0.626	0.522	0.000248971
Dad1	1.91181e-08	-0.457897	0.224	0.414	0.000298262
Rhoc	2.03151e-08	-0.605411	0.094	0.252	0.000316936
Ier5	2.08153e-08	0.5376	0.307	0.177	0.00032474
Rps4x	2.10233e-08	-0.367521	0.472	0.658	0.000327984
Klf6	2.23114e-08	0.534003	0.469	0.341	0.00034808
Rpl8	2.85572e-08	-0.330628	0.657	0.774	0.000445521
Rpl5	3.61407e-08	-0.421481	0.374	0.558	0.000563831
Rps20	4.42747e-08	-0.311342	0.669	0.793	0.000690729
Gm4149	5.06392e-08	-0.496654	0.15	0.322	0.000790023
Actb	5.15415e-08	0.28386	0.811	0.751	0.000804099
Gm7808	5.19546e-08	-0.521673	0.161	0.33	0.000810543
Flna	5.87884e-08	-0.566256	0.154	0.321	0.000917157
Klf4	6.04921e-08	-0.674573	0.228	0.383	0.000943737
Rpl13a	6.68908e-08	-0.585035	0.11	0.263	0.00104356
Gm15536	7.38801e-08	-0.514293	0.28	0.445	0.0011526
Rpl10-ps3	1.16597e-07	-0.503877	0.193	0.357	0.00181903
Arhgdia	1.22736e-07	0.44206	0.433	0.306	0.0019148
Rpsa	1.92778e-07	-0.322926	0.559	0.714	0.00300752
Fos	1.99465e-07	-0.532313	0.634	0.708	0.00311185
Zfp36l1	2.0335e-07	-0.544772	0.224	0.386	0.00317246
Ssr3	2.08063e-07	-0.487528	0.122	0.276	0.00324599
Gm8797	2.25256e-07	-0.474278	0.28	0.445	0.00351421
Rpl27a	2.41278e-07	-0.361479	0.409	0.58	0.00376418
Ssr2	2.73696e-07	-0.480146	0.181	0.342	0.00426993
Rps3	2.80975e-07	-0.271103	0.713	0.81	0.0043835
Igfbp4	3.22743e-07	-0.58719	0.201	0.361	0.00503511
Gm13436	4.19573e-07	-0.485561	0.106	0.251	0.00654576
Dazap2	4.63248e-07	0.542629	0.268	0.156	0.00722713
Pdia6	4.70951e-07	-0.471699	0.256	0.42	0.0073473
Gm5586	4.82524e-07	-0.47986	0.126	0.272	0.00752786
Sar1a	5.0038e-07	-0.487734	0.122	0.269	0.00780643
Wdr89	6.61026e-07	-0.442237	0.224	0.381	0.0103127
Krtcap2	6.97618e-07	-0.427566	0.213	0.383	0.0108835
Ccl7	8.0633e-07	0.910306	0.441	0.367	0.0125796
Marcks	8.10102e-07	0.424109	0.335	0.204	0.0126384
Rps16	8.47426e-07	-0.316798	0.626	0.766	0.0132207
Rpl28-ps1	9.01533e-07	-0.452643	0.11	0.252	0.0140648
Npm1	1.07972e-06	-0.379553	0.343	0.509	0.0168447
Gm12481	1.19742e-06	-0.510626	0.122	0.258	0.018681
Sgk1	1.22031e-06	-0.565413	0.205	0.356	0.019038
Eif4a2	1.23841e-06	-0.499441	0.118	0.255	0.0193204
Rack1	1.25831e-06	-0.331283	0.437	0.591	0.0196309
Rps8	1.29343e-06	-0.265202	0.634	0.732	0.0201789
Gm14586	1.44907e-06	-0.458836	0.161	0.305	0.022607
Mgp	1.50435e-06	-1.64664	0.417	0.494	0.0234693
Tmed3	1.57411e-06	-0.435682	0.114	0.255	0.0245577
Cnpy2	1.67617e-06	-0.538971	0.15	0.291	0.02615
Sec61g	1.93339e-06	-0.427657	0.24	0.396	0.0301628
Hspa1a	2.00217e-06	0.355019	0.665	0.557	0.0312358
Igkc	2.16456e-06	-0.87099	0.343	0.52	0.0337693
Fkbp1a	2.19457e-06	-0.403352	0.272	0.428	0.0342375
Surf4	2.21785e-06	-0.403098	0.146	0.294	0.0346006
Rhob	2.3024e-06	0.531998	0.382	0.27	0.0359197
Ctsl	2.63938e-06	-0.398242	0.469	0.623	0.0411769
Mir703	2.75456e-06	-0.307823	0.138	0.286	0.0429739
Gm9794	2.77081e-06	-0.483783	0.181	0.322	0.0432274
Vim	3.04943e-06	-0.34854	0.35	0.49	0.0475741
Rpl39	3.4996e-06	-0.269525	0.516	0.674	0.0545973
Skp1a	3.69025e-06	-0.449198	0.142	0.278	0.0575717
Arpc3	4.6376e-06	0.353577	0.484	0.376	0.0723512
mt-Nd3	5.12556e-06	-0.461395	0.189	0.329	0.0799639
Olfml3	5.35954e-06	-0.497038	0.165	0.303	0.0836141
Rps10	5.92455e-06	-0.29147	0.354	0.531	0.0924289
Rpl21	5.98185e-06	-0.291327	0.524	0.669	0.0933229
Bst2	6.03291e-06	0.380642	0.496	0.392	0.0941195
Tmed2	6.09267e-06	-0.466155	0.146	0.278	0.0950517
Atox1	7.15585e-06	0.411087	0.472	0.372	0.111638
Tpm3	7.53775e-06	0.385455	0.335	0.223	0.117596
Arf1	7.59732e-06	-0.391867	0.217	0.359	0.118526
Rpl7	7.87856e-06	-0.269546	0.693	0.778	0.122913
Xbp1	8.04776e-06	-0.42107	0.146	0.276	0.125553
Gm10288	8.75517e-06	-0.411479	0.138	0.269	0.136589
Rps13-ps2	9.46491e-06	-0.425933	0.134	0.263	0.147662
Btg1	9.51597e-06	-0.362054	0.169	0.309	0.148459
Sec11a	1.00955e-05	-0.37539	0.138	0.272	0.1575
Ndufa4	1.03481e-05	-0.370366	0.354	0.501	0.16144
Ywhaq	1.04989e-05	-0.468305	0.161	0.288	0.163794
Uqcrh	1.2778e-05	-0.297341	0.35	0.518	0.19935
Zfas1	1.4863e-05	-0.46076	0.157	0.287	0.231878
Map1lc3b	1.62529e-05	-0.37369	0.35	0.488	0.253561
Prdx2	1.73367e-05	-0.421158	0.217	0.351	0.270469
Manf	2.36695e-05	-0.42109	0.161	0.289	0.369268
Ifi27	2.36787e-05	-0.379001	0.138	0.262	0.369412
Spcs1	2.40835e-05	-0.41103	0.228	0.36	0.375727
Serbp1	2.49124e-05	-0.426161	0.232	0.361	0.388658
Slc38a2	2.63957e-05	-0.424195	0.177	0.305	0.4118
Rpl27	3.64004e-05	-0.273946	0.567	0.682	0.567883
Prdx1	3.94281e-05	0.334385	0.638	0.571	0.615117
Ifitm2	4.03139e-05	-0.333021	0.433	0.579	0.628937
Rps12	4.11672e-05	-0.263845	0.547	0.677	0.64225
Igf1	4.1973e-05	-0.536357	0.228	0.339	0.654821
Rpl28	4.49153e-05	-0.28522	0.465	0.608	0.700724
Rpl29	5.25911e-05	-0.32411	0.366	0.504	0.820473
Tmed9	5.33958e-05	-0.309506	0.185	0.321	0.833028
Scpep1	5.61933e-05	-0.451514	0.15	0.265	0.876672
Serf2	5.77997e-05	-0.309481	0.433	0.548	0.901733
Erh	6.27701e-05	-0.372346	0.15	0.264	0.979277
Snx3	6.60952e-05	0.411115	0.354	0.262	1
Hspb1	6.6696e-05	-0.773427	0.193	0.312	1
Jund	6.88873e-05	-0.331241	0.287	0.42	1
Sec61b	7.63294e-05	-0.340147	0.382	0.507	1
Coro1b	8.38223e-05	0.437508	0.272	0.183	1
Ube2b	8.63637e-05	-0.378081	0.154	0.269	1
Prdx5	9.42947e-05	0.499381	0.354	0.27	1
Brk1	0.000100663	0.372664	0.319	0.222	1
Selenos	0.000101429	-0.305341	0.142	0.258	1
Cdk4	0.000104353	-0.438421	0.173	0.285	1
Mt1	0.000109915	0.296389	0.492	0.397	1
Selenof	0.000126977	-0.302138	0.303	0.435	1
Gm8430	0.000161731	-0.335861	0.169	0.287	1
Mif	0.000181331	-0.34835	0.406	0.519	1
Bsg	0.0002192	-0.332164	0.315	0.433	1
Gpx1	0.000221259	0.259902	0.827	0.764	1
Eif5a	0.000224253	-0.333934	0.394	0.495	1
Eif3h	0.000230054	-0.303315	0.185	0.302	1
Fxyd5	0.000237995	0.421201	0.346	0.259	1
Eif4g2	0.000238948	-0.300278	0.264	0.386	1
Cox7a2l	0.000282249	-0.288859	0.22	0.34	1
Timp2	0.00028339	-0.455903	0.28	0.389	1
Vapa	0.000290671	-0.359962	0.165	0.27	1
Ndufa11	0.000301262	-0.336952	0.213	0.323	1
Ndufb2	0.000309221	-0.255798	0.146	0.253	1
Ndufb9	0.00040075	-0.296744	0.24	0.355	1
Dap	0.000411526	-0.336979	0.154	0.258	1
Btf3	0.000423468	-0.271912	0.268	0.391	1
Ndufa1	0.000436535	-0.324366	0.189	0.299	1
Phlda1	0.000453599	-0.350879	0.291	0.406	1
Taldo1	0.00045707	0.333558	0.276	0.194	1
Psme1	0.000487827	0.338154	0.295	0.21	1
Hmgn1	0.000528373	-0.334561	0.217	0.321	1
Cd9	0.000618266	-0.314273	0.224	0.333	1
Ppp1r15a	0.000620155	-0.299012	0.217	0.322	1
Igha	0.000629989	-0.961112	0.291	0.412	1
Psmd8	0.000659024	-0.280088	0.165	0.269	1
Gm9843	0.000672546	-0.268655	0.244	0.362	1
Dnajb1	0.000750154	-0.345409	0.272	0.385	1
Mtdh	0.000762367	-0.316873	0.157	0.255	1
Eef1d	0.000970316	-0.276247	0.161	0.262	1
Rab14	0.00118956	0.321221	0.272	0.199	1
Atp5b	0.00120529	-0.275724	0.319	0.427	1
Arpc5	0.00145954	0.293993	0.307	0.234	1
Jun	0.00152297	-0.293087	0.5	0.575	1
Cct5	0.00175741	-0.301638	0.173	0.263	1
Gpx4	0.00190009	-0.268814	0.224	0.326	1
Tmem258	0.00205919	-0.251705	0.331	0.446	1
Anxa3	0.00281923	-0.269288	0.197	0.288	1
Clic1	0.00297968	0.259801	0.496	0.423	1
Emp3	0.00310769	0.310157	0.37	0.307	1
Rtn4	0.00332101	0.389085	0.303	0.235	1
Atp6v1g1	0.00365842	0.344337	0.276	0.209	1
Eif3f	0.00392323	-0.258528	0.232	0.325	1
Malat1	0.00435706	-0.37167	0.319	0.396	1
Hmgb1	0.00512169	-0.275997	0.177	0.258	1
Uqcr11	0.00615741	-0.259434	0.24	0.325	1
Tuba1b	0.00622751	0.456937	0.335	0.289	1
Gdi2	0.00643247	0.298637	0.339	0.276	1
Sub1	0.00649521	-0.302219	0.346	0.439	1
Pim1	0.00739766	-0.26231	0.319	0.399	1
Atp6v1f	0.0163702	0.264421	0.374	0.322	1
Hspa1b	0.018231	0.400097	0.303	0.258	1
Pkm	0.0980401	0.267012	0.331	0.304	1
Ftl1-ps1	0.228457	0.352152	0.457	0.485	1

## Sheet: 6 endothelial_Plvap_high
Table S2: Representative genes of each cell cluster
	p_val	avg_logFC	pct.1	pct.2	p_val_adj
Plvap	0	2.38995	0.615	0.022	0
Emcn	8.76016e-282	2.14549	0.545	0.018	1.36667e-277
Egfl7	9.46143e-267	2.21052	0.57	0.025	1.47608e-262
Grrp1	4.75418e-261	1.879	0.361	0.002	7.417e-257
Selp	1.29997e-259	2.50969	0.414	0.007	2.02808e-255
Esam	2.28653e-257	2.17277	0.545	0.023	3.56721e-253
Tmem252	5.63991e-244	2.19551	0.385	0.006	8.79883e-240
Flt1	5.88908e-243	1.8981	0.373	0.005	9.18755e-239
Tm4sf1	5.20136e-236	2.76406	0.676	0.057	8.11465e-232
Ptprb	4.082e-224	1.86585	0.381	0.008	6.36833e-220
Mmrn2	8.8183e-215	1.80943	0.34	0.005	1.37574e-210
Cdh5	5.36192e-210	1.83809	0.398	0.012	8.36514e-206
Adgrf5	6.41713e-210	1.78941	0.336	0.005	1.00114e-205
Pecam1	5.80187e-195	1.72192	0.344	0.008	9.0515e-191
Tmem88	4.67345e-182	1.69932	0.332	0.009	7.29105e-178
Cd200	3.52419e-180	1.94385	0.43	0.023	5.49809e-176
Rgs16	1.05099e-176	2.06114	0.373	0.015	1.63965e-172
Ecscr	4.04068e-170	1.72266	0.344	0.012	6.30386e-166
Scarb1	2.02468e-142	1.78655	0.369	0.023	3.15871e-138
Hspb1	9.23405e-141	2.6397	0.861	0.265	1.4406e-136
Rasip1	7.71004e-140	1.51167	0.266	0.008	1.20284e-135
Podxl	1.52234e-132	1.58601	0.254	0.008	2.37501e-128
Iigp1	2.05318e-127	1.54851	0.266	0.01	3.20316e-123
Cd93	1.65153e-124	1.60761	0.344	0.023	2.57655e-120
Ly6c1	1.35439e-119	2.09257	0.578	0.097	2.11298e-115
Id1	1.90254e-118	1.94756	0.525	0.076	2.96816e-114
Ier3	6.36595e-114	2.11478	0.873	0.353	9.93152e-110
Abcg2	5.79841e-105	1.54337	0.34	0.03	9.0461e-101
Kdr	1.69502e-94	1.35164	0.258	0.017	2.64439e-90
Ifitm3	7.48527e-94	1.20212	0.971	0.756	1.16778e-89
Aqp1	7.71551e-87	1.91442	0.611	0.161	1.2037e-82
Eng	6.74824e-84	1.62342	0.418	0.067	1.05279e-79
Ly6e	1.74067e-83	1.41336	0.865	0.423	2.71562e-79
Lrg1	1.54998e-81	1.79477	0.275	0.026	2.41813e-77
Dusp2	6.13003e-81	1.58904	0.348	0.044	9.56346e-77
Lgals1	2.45437e-79	-1.60756	0.365	0.88	3.82906e-75
Gimap6	3.77339e-79	1.42542	0.352	0.047	5.88686e-75
Crip2	5.13796e-78	1.61797	0.463	0.09	8.01574e-74
Dcn	2.4921e-73	-2.20611	0.316	0.83	3.88793e-69
Slfn5	4.87613e-71	1.49668	0.43	0.081	7.60726e-67
Ddit4	8.05749e-68	1.50834	0.377	0.066	1.25705e-63
Ehd4	5.34102e-67	1.59453	0.365	0.063	8.33253e-63
Cd63	6.67057e-67	-1.45812	0.344	0.851	1.04068e-62
Hsp25-ps1	2.03983e-66	1.62801	0.426	0.09	3.18234e-62
Id3	3.10011e-66	1.39822	0.746	0.313	4.83648e-62
Sbno2	3.35593e-66	1.42453	0.299	0.04	5.23558e-62
Pdlim1	1.63425e-65	1.7464	0.463	0.11	2.54959e-61
Igfbp7	4.37511e-64	1.20259	0.943	0.743	6.8256e-60
2010111I01Rik	5.05166e-63	1.37318	0.27	0.034	7.8811e-59
Clec2d	5.58806e-61	1.31768	0.307	0.046	8.71793e-57
Col1a1	1.09244e-60	-2.39136	0.164	0.71	1.70432e-56
Tspan13	2.82984e-60	1.33463	0.291	0.042	4.41483e-56
Col1a2	6.37569e-60	-2.14408	0.234	0.738	9.94671e-56
Col3a1	9.14595e-60	-2.54764	0.086	0.658	1.42686e-55
Hes1	4.08127e-58	1.40611	0.828	0.431	6.36719e-54
Col6a2	1.7444e-57	-2.3357	0.086	0.647	2.72143e-53
Col6a1	1.4472e-54	-2.45431	0.061	0.609	2.25778e-50
B2m	1.91451e-53	0.687678	0.988	0.874	2.98683e-49
Icam1	1.2881e-48	1.57444	0.434	0.124	2.00956e-44
mt-Rnr2	5.17869e-47	0.764138	0.988	0.893	8.07927e-43
Cebpd	5.20064e-47	1.57587	0.496	0.178	8.11351e-43
Nfkbia	1.3127e-44	1.20395	0.84	0.544	2.04794e-40
Junb	5.49851e-44	1.10341	0.791	0.498	8.57823e-40
Epas1	3.51344e-43	1.14841	0.258	0.047	5.48132e-39
Ftl1	1.34955e-41	-0.828709	0.742	0.908	2.10544e-37
Calm1	1.49475e-41	0.903659	0.877	0.688	2.33196e-37
Arl4a	1.70206e-41	1.34988	0.352	0.092	2.65538e-37
Rps27	3.43529e-41	0.484937	1	0.967	5.3594e-37
Ly6a	1.06939e-40	1.31616	0.59	0.277	1.66836e-36
Ftl1-ps1	6.59848e-40	-1.94265	0.053	0.513	1.02943e-35
Cav1	8.28803e-40	1.26252	0.451	0.161	1.29301e-35
Aebp1	1.54945e-39	-1.40371	0.197	0.657	2.4173e-35
Clu	3.21424e-39	1.32891	0.336	0.085	5.01454e-35
Gsn	9.09501e-39	-1.5519	0.168	0.61	1.41891e-34
Col6a3	5.36964e-38	-2.06857	0.053	0.493	8.37717e-34
Ctla2a	1.7181e-37	0.7912	0.77	0.46	2.6804e-33
Zfp36	1.8504e-37	1.36217	0.701	0.444	2.88682e-33
Adh1	4.113e-35	-1.92076	0.057	0.486	6.4167e-31
Tsc22d1	1.07377e-34	1.01924	0.668	0.378	1.67519e-30
Pim3	1.30142e-34	1.38062	0.422	0.157	2.03035e-30
Col6a4	2.48418e-34	-2.02196	0.033	0.443	3.87557e-30
mt-Rnr1	8.81571e-34	0.718408	0.848	0.552	1.37534e-29
Igkc	1.29353e-33	-1.88804	0.115	0.536	2.01804e-29
Elk3	4.5652e-33	1.0567	0.266	0.063	7.12216e-29
Gng11	5.23819e-33	1.02937	0.316	0.084	8.17211e-29
Rnase4	1.78295e-32	-1.27883	0.16	0.59	2.78157e-28
Tshz2	7.43622e-32	1.16401	0.307	0.084	1.16012e-27
Mfap5	1.37368e-31	-1.49017	0.102	0.5	2.14308e-27
Slc9a3r2	6.34473e-31	1.14903	0.262	0.065	9.89841e-27
Igfbp6	8.2584e-31	-1.40038	0.119	0.514	1.28839e-26
H2-K1	1.15588e-30	0.690764	0.787	0.527	1.8033e-26
Lum	1.69861e-30	-1.47023	0.139	0.536	2.65001e-26
Ogn	3.70941e-30	-1.74217	0.033	0.409	5.78705e-26
Cd63-ps	4.26615e-30	-1.71673	0.025	0.4	6.65561e-26
Tmsb4x	9.57887e-30	0.284336	0.996	0.988	1.4944e-25
Gm10736	1.63575e-29	-1.00372	0.324	0.653	2.55194e-25
Rps29	4.77021e-29	0.416941	0.975	0.945	7.44201e-25
Ccl7	1.62268e-28	-2.03457	0.033	0.396	2.53154e-24
Maf	3.33052e-28	-1.59083	0.033	0.399	5.19595e-24
Spon2	8.81061e-28	-1.45827	0.045	0.411	1.37454e-23
Hspa1a	1.60157e-27	0.936365	0.766	0.55	2.49861e-23
Irf1	2.751e-27	1.2094	0.299	0.094	4.29184e-23
H2-Q7	4.65857e-27	0.960892	0.275	0.076	7.26784e-23
Dpt	8.71995e-27	-1.31445	0.082	0.456	1.3604e-22
Ctsb	2.29854e-26	-0.955241	0.361	0.712	3.58595e-22
Cstb	5.54533e-26	-1.29686	0.057	0.414	8.65127e-22
Lsp1	7.07886e-26	-1.17292	0.18	0.555	1.10437e-21
Igha	1.0494e-25	-1.94986	0.07	0.427	1.63717e-21
Sptbn1	1.41525e-25	0.982713	0.332	0.115	2.20793e-21
Aldh1a2	1.71057e-25	-1.76233	0.037	0.37	2.66867e-21
Hsd11b2	2.84982e-25	-1.9239	0.004	0.327	4.446e-21
Ramp3	3.29113e-25	-1.62648	0.029	0.362	5.13449e-21
Cd164	5.34163e-25	-1.2681	0.074	0.423	8.33347e-21
Fstl1	4.21904e-24	-1.19129	0.148	0.482	6.58212e-20
Errfi1	1.6537e-23	-1.58967	0.033	0.349	2.57994e-19
P2ry14	2.84828e-23	-1.67872	0.004	0.309	4.44361e-19
Serpinf1	3.13288e-23	-1.30943	0.037	0.354	4.88761e-19
Crispld2	4.05067e-23	-1.38575	0.061	0.386	6.31945e-19
Prss23	4.40296e-23	-1.20181	0.201	0.514	6.86906e-19
Rps6-ps4	4.80519e-23	-1.16698	0.061	0.39	7.49657e-19
Gm10076	1.47435e-22	-1.06355	0.148	0.478	2.30014e-18
Fbln2	2.67421e-22	-1.5371	0.049	0.357	4.17204e-18
Rps21	2.73026e-22	0.562451	0.828	0.71	4.25948e-18
Serpinh1	5.40605e-22	-0.926154	0.377	0.638	8.43398e-18
Fxyd5	9.70557e-22	0.853256	0.484	0.249	1.51417e-17
Gm8797	1.37315e-21	-1.08096	0.127	0.455	2.14224e-17
Tmem176b	1.4072e-21	0.734493	0.529	0.262	2.19538e-17
Col5a1	1.59175e-21	-1.37869	0.008	0.295	2.48329e-17
Gm15427	2.17369e-21	-0.852018	0.348	0.635	3.39117e-17
Rcn3	2.18208e-21	-1.11835	0.078	0.393	3.40426e-17
Gpx8	3.02505e-21	-1.13201	0.041	0.344	4.71938e-17
Gnai2	3.93101e-21	0.90691	0.525	0.302	6.13277e-17
Atp1b3	4.42658e-21	1.00149	0.41	0.198	6.90591e-17
Cyr61	6.65661e-21	-1.29996	0.172	0.474	1.0385e-16
Socs3	9.77306e-21	1.01378	0.357	0.151	1.5247e-16
Gm1821	1.03434e-20	-0.939856	0.148	0.474	1.61368e-16
Fn1	2.05642e-20	-1.2248	0.045	0.339	3.20823e-16
Gm5905	2.38564e-20	-1.05767	0.057	0.36	3.72183e-16
Myl6	4.12122e-20	-0.750136	0.352	0.66	6.42951e-16
Actn4	6.0211e-20	0.933576	0.385	0.179	9.39351e-16
Htra1	1.1888e-19	-1.1194	0.139	0.439	1.85465e-15
Igf1	1.30963e-19	-1.24048	0.061	0.351	2.04316e-15
Ccl2	1.57723e-19	-2.06719	0.02	0.288	2.46064e-15
Olfml3	1.62305e-19	-1.32325	0.037	0.312	2.53212e-15
Ptma	2.021e-19	0.462428	0.844	0.74	3.15296e-15
Rpl3-ps1	2.13801e-19	-1.00492	0.061	0.359	3.33551e-15
Mmp14	2.89869e-19	-1.13409	0.189	0.496	4.52224e-15
Hsp90ab1	3.21111e-19	0.623315	0.775	0.652	5.00966e-15
Ddit4l	3.23147e-19	-1.34205	0.025	0.294	5.04142e-15
Spon1	3.92573e-19	-1.32458	0.016	0.279	6.12453e-15
Ccl11	9.39099e-19	-1.66752	0	0.251	1.46509e-14
H2-D1	1.35918e-18	0.503132	0.754	0.56	2.12046e-14
Pltp	1.80815e-18	0.758541	0.443	0.214	2.82089e-14
Tnfaip6	5.94345e-18	-1.4778	0.008	0.253	9.27238e-14
Rps6	6.43066e-18	-0.697746	0.32	0.6	1.00325e-13
Sec61g	8.56652e-18	-0.867904	0.111	0.404	1.33646e-13
Mt1	1.03431e-17	-0.867486	0.123	0.423	1.61363e-13
Raly	1.16582e-17	-0.82961	0.266	0.541	1.8188e-13
Rn7sk	2.17028e-17	1.1089	0.266	0.097	3.38585e-13
Rpl37rt	2.38837e-17	-0.867923	0.111	0.4	3.7261e-13
Rab11a	3.1282e-17	0.897293	0.41	0.22	4.8803e-13
Rarres2	3.20595e-17	-0.858054	0.164	0.47	5.00161e-13
Timp3	3.37772e-17	0.836025	0.373	0.175	5.26958e-13
Tuba1a	4.41475e-17	-0.877322	0.176	0.462	6.88745e-13
Adamts2	5.99852e-17	-1.13426	0.025	0.269	9.3583e-13
Plpp1	6.29461e-17	0.886824	0.266	0.102	9.82022e-13
Rps19-ps6	6.35847e-17	-0.900041	0.066	0.336	9.91984e-13
Tpm2	9.03979e-17	-1.08645	0.057	0.317	1.4103e-12
Snhg18	9.14553e-17	-1.1536	0.016	0.256	1.42679e-12
Hspa5	9.7251e-17	-0.674271	0.324	0.616	1.51721e-12
Gm13588	1.02035e-16	-1.02801	0.02	0.263	1.59185e-12
Uba52	1.02395e-16	-0.815208	0.139	0.433	1.59747e-12
Lox	3.31686e-16	-1.03658	0.037	0.283	5.17463e-12
Hspa8	4.3653e-16	0.474532	0.893	0.843	6.81031e-12
Thbd	5.2217e-16	0.817327	0.279	0.112	8.14637e-12
Gm5805	6.71772e-16	-0.734997	0.18	0.474	1.04803e-11
Osr2	1.38613e-15	-1.08211	0.033	0.267	2.1625e-11
Rpl14-ps1	1.90225e-15	-0.900457	0.053	0.299	2.96771e-11
Gas6	2.25949e-15	-1.04968	0.074	0.319	3.52503e-11
Mdk	3.07202e-15	-1.03166	0.111	0.368	4.79266e-11
Gm8730	3.37375e-15	-0.890035	0.061	0.306	5.26339e-11
Eef1a1	4.25318e-15	-0.570287	0.594	0.749	6.63538e-11
Mfap4	4.58823e-15	-1.01129	0.102	0.354	7.1581e-11
Gm11478	5.82752e-15	-0.789429	0.078	0.334	9.09151e-11
Ddost	7.12418e-15	-0.86311	0.061	0.303	1.11144e-10
Gapdh	8.79643e-15	-0.67436	0.217	0.498	1.37233e-10
Mgp	1.05239e-14	-0.254124	0.791	0.468	1.64184e-10
Swi5	1.0844e-14	-0.681613	0.221	0.502	1.69177e-10
Gm12481	1.11377e-14	-0.894119	0.037	0.264	1.73759e-10
Tmem258	1.44545e-14	-0.657655	0.176	0.456	2.25504e-10
P4hb	1.46798e-14	-0.711876	0.205	0.477	2.2902e-10
Hsp90b1	1.78695e-14	-0.755798	0.193	0.458	2.78783e-10
Fxyd1	2.07156e-14	-1.02444	0.033	0.252	3.23184e-10
Rpl35	2.22368e-14	-0.466268	0.635	0.777	3.46917e-10
Gng12	2.44909e-14	-0.83378	0.164	0.419	3.82083e-10
Cyba	2.96395e-14	-0.839882	0.119	0.372	4.62406e-10
Hspa1b	3.15754e-14	0.72107	0.434	0.249	4.92608e-10
Rpl26	3.16081e-14	0.363803	0.873	0.83	4.93118e-10
Gm2000	3.37223e-14	-0.598867	0.373	0.621	5.26102e-10
Klf2	3.8749e-14	0.858898	0.336	0.167	6.04523e-10
Lgals3	6.75848e-14	-1.06339	0.102	0.347	1.05439e-09
Rpl18-ps1	7.71035e-14	-0.890694	0.045	0.262	1.20289e-09
Hsp90aa1	8.92864e-14	0.743371	0.627	0.504	1.39296e-09
Mmp2	9.56622e-14	-0.989802	0.127	0.368	1.49243e-09
Actg1	9.78559e-14	-0.556521	0.418	0.659	1.52665e-09
Col5a2	1.43286e-13	-0.885254	0.041	0.257	2.23541e-09
Scpep1	2.33854e-13	-0.894766	0.053	0.271	3.64835e-09
Tgm2	3.1695e-13	0.670206	0.41	0.234	4.94474e-09
Rps26-ps1	3.52536e-13	-0.770848	0.066	0.289	5.49992e-09
Serping1	4.36732e-13	-0.909497	0.143	0.38	6.81345e-09
mt-Nd3	4.43436e-13	-0.727039	0.098	0.335	6.91805e-09
Nfkbiz	4.43732e-13	0.833689	0.275	0.128	6.92267e-09
Sparcl1	4.49087e-13	0.314268	0.635	0.387	7.00621e-09
Htra3	5.40111e-13	-0.946078	0.049	0.262	8.42628e-09
Anxa5	8.95982e-13	-0.615816	0.275	0.537	1.39782e-08
Psap	9.08434e-13	-0.833546	0.197	0.445	1.41725e-08
Serf2	9.9402e-13	-0.607524	0.299	0.557	1.55077e-08
Wdr89	1.55923e-12	-0.643333	0.139	0.386	2.43256e-08
Cd9	1.6597e-12	0.693365	0.48	0.315	2.5893e-08
Gm10288	1.972e-12	-0.736789	0.061	0.274	3.07652e-08
Dbi	2.06709e-12	-0.622905	0.156	0.406	3.22487e-08
Fkbp1a	4.79947e-12	0.680808	0.529	0.409	7.48765e-08
Gm11361	5.78608e-12	-0.579952	0.291	0.532	9.02686e-08
Mfap2	5.98708e-12	-0.8766	0.078	0.288	9.34045e-08
Anxa1	8.64886e-12	-0.711245	0.135	0.362	1.34931e-07
Fosb	1.18466e-11	-0.753684	0.246	0.463	1.84818e-07
Gm14303	1.28949e-11	-0.530479	0.258	0.517	2.01173e-07
Rps23-ps1	1.71844e-11	-0.641904	0.111	0.331	2.68094e-07
Pdia3	1.81335e-11	-0.53536	0.176	0.426	2.82901e-07
Cald1	1.86714e-11	-0.766964	0.119	0.333	2.91292e-07
Laptm4a	1.89938e-11	-0.501313	0.455	0.673	2.96322e-07
Bgn	2.49458e-11	-0.768742	0.07	0.271	3.89179e-07
Adamts1	3.10352e-11	0.808624	0.443	0.286	4.84181e-07
S100a11	5.49513e-11	-0.509894	0.361	0.592	8.57296e-07
Manf	6.23047e-11	-0.671196	0.09	0.294	9.72016e-07
Tmem176a	6.55199e-11	0.648856	0.324	0.172	1.02218e-06
Thbs1	7.61266e-11	-0.757288	0.123	0.331	1.18765e-06
Atf3	8.98136e-11	0.767182	0.455	0.31	1.40118e-06
Maged1	1.07103e-10	-0.600821	0.094	0.301	1.67091e-06
Gm7808	1.29126e-10	-0.528027	0.119	0.332	2.01449e-06
Rpl38	1.40847e-10	0.330815	0.816	0.766	2.19735e-06
Gm13436	1.84445e-10	-0.656366	0.066	0.253	2.87753e-06
Pim1	1.93795e-10	-0.573822	0.18	0.409	3.02339e-06
S100a13	2.48873e-10	0.753012	0.283	0.151	3.88267e-06
Nupr1	2.60364e-10	-0.650553	0.119	0.325	4.06193e-06
Gm15500	2.63885e-10	-0.657645	0.066	0.251	4.11686e-06
Surf4	2.64497e-10	-0.566554	0.094	0.297	4.12641e-06
Plpp3	2.8733e-10	0.579148	0.434	0.276	4.48263e-06
Selenow	3.1063e-10	-0.486849	0.287	0.532	4.84613e-06
Serinc3	3.26647e-10	0.671494	0.402	0.26	5.09603e-06
Son	3.34602e-10	0.559907	0.586	0.476	5.22013e-06
Myl9	3.38674e-10	-0.767123	0.156	0.369	5.28366e-06
Vapa	3.4205e-10	-0.557222	0.082	0.275	5.33632e-06
Tpm1	3.64012e-10	-0.665632	0.123	0.33	5.67895e-06
Serp1	3.79015e-10	-0.561134	0.131	0.342	5.91301e-06
Tmed2	4.1365e-10	-0.505638	0.086	0.282	6.45335e-06
Tpt1-ps3	4.15057e-10	-0.54122	0.09	0.285	6.47531e-06
Ilk	4.16788e-10	-0.591803	0.078	0.263	6.5023e-06
Socs2	4.90292e-10	0.792209	0.275	0.147	7.64904e-06
Gstm1	4.92779e-10	-0.691743	0.107	0.301	7.68784e-06
Snx3	6.02463e-10	0.748421	0.389	0.26	9.39902e-06
Rpl15	6.26918e-10	-0.437422	0.373	0.597	9.78054e-06
Rpl10a-ps1	6.93887e-10	-0.545235	0.156	0.372	1.08253e-05
Ssr3	8.61843e-10	-0.585215	0.09	0.278	1.34456e-05
Nbl1	9.16838e-10	-0.878182	0.25	0.446	1.43036e-05
Aldoa	1.0004e-09	-0.54799	0.16	0.368	1.56073e-05
Rpl22l1	1.12546e-09	-0.439942	0.295	0.527	1.75584e-05
Ramp2	1.23169e-09	0.594813	0.492	0.351	1.92156e-05
Rpl28-ps1	1.39797e-09	-0.584047	0.074	0.254	2.18097e-05
Rps13-ps2	1.48257e-09	-0.550389	0.082	0.267	2.31296e-05
Lamp2	1.56847e-09	-0.624535	0.143	0.34	2.44697e-05
Gm9794	1.57861e-09	-0.498066	0.123	0.326	2.46279e-05
Rps12	1.79322e-09	0.375316	0.742	0.663	2.79761e-05
S100a16	1.82708e-09	0.696557	0.348	0.216	2.85043e-05
Rpl11	1.90875e-09	0.332277	0.811	0.763	2.97784e-05
Selenos	2.21926e-09	-0.579753	0.082	0.262	3.46227e-05
Cd74	2.31349e-09	-2.28799	0.164	0.351	3.60928e-05
Calu	2.31573e-09	-0.584501	0.098	0.283	3.61277e-05
Rps27rt	2.58984e-09	-0.539539	0.123	0.318	4.04042e-05
Sec61b	3.01803e-09	-0.448116	0.283	0.513	4.70843e-05
Pdia6	3.94479e-09	-0.473139	0.205	0.423	6.15427e-05
Ppib	3.96708e-09	-0.452374	0.234	0.458	6.18904e-05
Ndufc1	4.00357e-09	-0.627894	0.094	0.27	6.24596e-05
Mif	4.02195e-09	-0.516904	0.295	0.526	6.27465e-05
Gm5586	4.11787e-09	-0.552358	0.094	0.274	6.4243e-05
Fcer1g	4.21191e-09	-0.904974	0.107	0.282	6.571e-05
Rpl10-ps3	4.61459e-09	-0.468354	0.152	0.36	7.19922e-05
Map1lc3a	4.91275e-09	-0.534289	0.172	0.374	7.66437e-05
Dap	5.34859e-09	-0.575788	0.086	0.262	8.34434e-05
Rps24	5.50841e-09	0.330046	0.783	0.759	8.59367e-05
Ptms	6.44123e-09	0.524188	0.439	0.305	0.00010049
Msn	6.99425e-09	0.741746	0.307	0.185	0.000109117
Gm15536	8.09584e-09	-0.391514	0.221	0.449	0.000126303
Rps7	8.17412e-09	0.279299	0.877	0.841	0.000127524
Rpl10a	1.35939e-08	-0.399227	0.398	0.603	0.000212078
Btg1	1.72146e-08	-0.531573	0.127	0.312	0.000268564
S100a6	1.95965e-08	-0.361682	0.369	0.596	0.000305724
Ssr2	2.14164e-08	-0.515613	0.156	0.343	0.000334117
Rps20	2.22171e-08	0.296877	0.807	0.783	0.000346609
Tagln2	2.6606e-08	0.628394	0.43	0.321	0.00041508
Tyrobp	2.8437e-08	-0.943633	0.111	0.268	0.000443645
Rpl30	2.89857e-08	0.344896	0.701	0.682	0.000452206
Atp6v0e	5.50228e-08	-0.505725	0.148	0.327	0.000858411
Ctsd	6.1921e-08	-0.67235	0.205	0.383	0.000966029
Gm14586	6.27098e-08	-0.385726	0.127	0.307	0.000978336
Nme1	6.59213e-08	-0.432721	0.111	0.284	0.00102844
Rpl13a	7.09963e-08	-0.478193	0.098	0.263	0.00110761
Pfn1	7.21615e-08	-0.461792	0.348	0.541	0.00112579
Clic1	8.34999e-08	0.476576	0.52	0.422	0.00130268
Gm4149	9.06206e-08	-0.378079	0.135	0.323	0.00141377
Gm8430	1.26651e-07	-0.446039	0.119	0.29	0.00197588
Gm9843	1.46766e-07	-0.400279	0.176	0.366	0.0022897
Rnh1	1.56711e-07	-0.520547	0.115	0.276	0.00244485
Vim	1.76443e-07	0.359264	0.59	0.473	0.00275268
Ost4	1.88963e-07	-0.441278	0.131	0.298	0.00294801
Sqstm1	2.36155e-07	-0.383203	0.32	0.514	0.00368425
Timp2	2.47717e-07	-0.552271	0.217	0.393	0.00386464
Canx	2.76764e-07	-0.461429	0.111	0.271	0.0043178
Atp5e	2.88506e-07	-0.392923	0.266	0.469	0.00450099
Psmb8	3.94525e-07	0.563401	0.254	0.145	0.00615498
Arf4	4.2379e-07	-0.311497	0.213	0.412	0.00661154
Atp5a1	5.28408e-07	-0.346773	0.205	0.4	0.00824369
Rpl18	6.32797e-07	0.312967	0.73	0.704	0.00987226
Ifi27l2a	6.64955e-07	-0.44103	0.176	0.354	0.010374
Prdx5	6.82647e-07	-0.38329	0.123	0.287	0.01065
Calr	7.20107e-07	-0.358438	0.287	0.476	0.0112344
Ybx1	7.76505e-07	-0.365916	0.254	0.446	0.0121142
Ift20	8.09892e-07	-0.392808	0.098	0.251	0.0126351
Rps3	9.04311e-07	0.258872	0.795	0.804	0.0141082
Ifrd1	9.8621e-07	-0.348217	0.258	0.444	0.0153859
Cnpy2	1.02064e-06	-0.473542	0.135	0.291	0.0159229
Mylk	1.08071e-06	-0.682855	0.143	0.295	0.0168601
Eif4g2	1.09738e-06	-0.347187	0.205	0.39	0.0171202
Eif4a2	1.45968e-06	-0.39744	0.107	0.255	0.0227724
Ssr4	1.64176e-06	-0.33964	0.156	0.325	0.025613
Cct5	1.65554e-06	-0.398836	0.115	0.267	0.0258281
Sub1	1.6673e-06	-0.3805	0.262	0.444	0.0260116
Rpl36a	1.79886e-06	0.338422	0.68	0.637	0.0280641
Dynll1	1.92965e-06	0.437752	0.516	0.429	0.0301045
Ndufa11	1.96383e-06	-0.299686	0.156	0.327	0.0306377
Cops9	1.98391e-06	-0.294516	0.197	0.374	0.030951
Cyb5r3	1.99628e-06	0.63088	0.254	0.157	0.031144
Selenom	2.1521e-06	-0.417185	0.111	0.258	0.0335749
Eef1g	2.80709e-06	-0.330052	0.336	0.517	0.0437934
Mfge8	3.72674e-06	-0.38913	0.111	0.254	0.0581408
Csrp1	3.99494e-06	-0.458504	0.123	0.263	0.062325
H2-Ab1	4.94473e-06	-1.65018	0.189	0.336	0.0771427
H2afz	5.1719e-06	-0.464808	0.217	0.377	0.0806868
Gpx4	5.32369e-06	-0.356678	0.172	0.33	0.0830549
Anxa2	5.67854e-06	-0.387009	0.402	0.534	0.0885908
S100a10	6.50318e-06	-0.363286	0.352	0.523	0.101456
Tmed3	6.53747e-06	-0.366883	0.115	0.255	0.101991
Lamp1	6.76152e-06	-0.359453	0.221	0.386	0.105486
D8Ertd738e	7.39093e-06	-0.311721	0.143	0.294	0.115306
Cope	8.89879e-06	-0.365597	0.127	0.267	0.13883
Sar1a	1.00582e-05	-0.279938	0.123	0.268	0.156917
Chchd2	1.1757e-05	0.459983	0.561	0.533	0.183421
Ctsz	1.28116e-05	-0.443569	0.143	0.279	0.199873
Pabpc1	1.31977e-05	-0.256938	0.434	0.608	0.205897
Actr3	1.45746e-05	-0.304329	0.115	0.251	0.227379
Fosl2	1.48039e-05	0.631943	0.27	0.183	0.230956
Erh	1.50411e-05	-0.383682	0.131	0.265	0.234657
Sox4	1.59671e-05	0.306771	0.434	0.312	0.249103
Emp1	2.09048e-05	0.710202	0.385	0.314	0.326136
Dusp1	2.28302e-05	0.319068	0.648	0.583	0.356175
Chchd10	2.43206e-05	-0.810959	0.168	0.285	0.379426
Pomp	2.48399e-05	-0.30432	0.139	0.278	0.387526
Flna	2.73972e-05	-0.322345	0.172	0.319	0.427424
Spcs1	3.28118e-05	-0.303544	0.209	0.361	0.511897
Hsbp1	3.48506e-05	-0.299841	0.152	0.29	0.543704
Ndufa13	3.59062e-05	-0.279136	0.242	0.411	0.560172
Atp5g1	3.62652e-05	-0.313545	0.193	0.338	0.565773
Uqcrq	4.11921e-05	-0.323877	0.209	0.355	0.642638
Mrpl52	4.70467e-05	-0.331427	0.143	0.274	0.733975
Klf6	5.32018e-05	-0.287814	0.209	0.359	0.830001
Gabarap	5.32851e-05	-0.289416	0.389	0.568	0.831301
Rpl22	5.36929e-05	0.363777	0.598	0.565	0.837663
Txnip	5.63107e-05	0.309857	0.262	0.163	0.878503
Ndufv3	5.65232e-05	-0.367013	0.156	0.284	0.881819
Ndufa6	6.46137e-05	0.45429	0.406	0.329	1
Uqcrb	6.64223e-05	0.424935	0.467	0.404	1
Atp5d	8.67762e-05	-0.263766	0.213	0.366	1
Hspe1	9.0307e-05	0.563534	0.459	0.407	1
Ppia	9.78157e-05	-0.2851	0.471	0.618	1
Ifitm2	9.90083e-05	0.319258	0.582	0.568	1
Pcbp1	0.000103548	0.472288	0.402	0.331	1
Npc2	0.00011241	-0.359334	0.365	0.511	1
Rpl9	0.000119117	0.259897	0.68	0.667	1
Rps13	0.000167679	0.282234	0.68	0.679	1
Bsg	0.000205487	0.484659	0.463	0.422	1
Tmed9	0.000205862	-0.251127	0.189	0.32	1
Lyz2	0.000257	-1.46564	0.225	0.334	1
Ddx3x	0.000331052	0.534527	0.299	0.228	1
Elob	0.000332562	-0.258816	0.336	0.495	1
Eif4a1	0.000447032	-0.2699	0.303	0.446	1
Atox1	0.000556866	0.440569	0.434	0.375	1
Dnajb1	0.00125039	0.462534	0.426	0.374	1
Sat1	0.00141221	0.472026	0.381	0.327	1
Ndufb9	0.00175198	-0.267771	0.238	0.355	1
Atp5j	0.0021467	0.327517	0.5	0.466	1
Apoe	0.00241384	-0.585026	0.705	0.643	1
Fth1	0.0032225	-0.302963	0.947	0.963	1
Grn	0.00373447	-0.298232	0.164	0.254	1
Xbp1	0.00380646	0.530477	0.307	0.264	1
Arpc3	0.00395595	0.309196	0.422	0.381	1
Rac1	0.00410412	0.408015	0.279	0.222	1
Pcbp2	0.00452906	0.391946	0.402	0.363	1
Tspo	0.00571433	0.364134	0.336	0.289	1
Sri	0.00934596	0.481607	0.279	0.238	1
Gpx3	0.0112172	-0.573579	0.643	0.714	1
Tcf4	0.0154863	0.440927	0.291	0.246	1
Jund	0.0168687	0.416199	0.418	0.411	1
Ywhab	0.0193019	0.33817	0.34	0.304	1
Prkcdbp	0.0197683	0.363939	0.328	0.294	1
Serbp1	0.0239849	0.32954	0.385	0.35	1
Rhob	0.030424	0.282808	0.32	0.274	1
Gadd45g	0.037215	-0.348984	0.664	0.641	1
1810037I17Rik	0.0424094	0.341362	0.27	0.237	1
Slc38a2	0.0445988	0.328863	0.316	0.295	1
Eif3f	0.0502633	0.351142	0.336	0.317	1
Ccnl1	0.0511548	0.332852	0.291	0.266	1
Rbx1	0.0566257	0.338488	0.311	0.29	1
Tpm3	0.0615525	0.320856	0.258	0.229	1
Eif2s2	0.0797301	0.28491	0.43	0.438	1
Col4a2	0.0831905	0.356548	0.283	0.26	1
Cox7a2l	0.0846271	0.308123	0.344	0.331	1
Dnaja1	0.0868183	0.299186	0.393	0.384	1
Ifi27	0.097938	0.346915	0.275	0.252	1
Rbpms	0.103311	0.322271	0.258	0.237	1
Rbm39	0.114352	0.266971	0.369	0.366	1
Nr4a1	0.131447	0.335104	0.295	0.28	1
Bhlhe40	0.164766	0.288114	0.275	0.262	1
Rabac1	0.310932	0.270292	0.291	0.29	1
Atf4	0.499037	0.25566	0.324	0.354	1
Eif3h	0.554789	0.272319	0.279	0.296	1
Lmna	0.753195	0.294331	0.23	0.277	1

## Sheet: 7 epithelial2 
Table S2: Representative genes of each cell cluster
	p_val	avg_logFC	pct.1	pct.2	p_val_adj
Sprr2f	3.17729e-239	3.17303	0.949	0.134	4.95689e-235
Fam213a	0	2.78382	0.909	0.076	0
Krt19	2.06448e-275	2.69306	0.924	0.096	3.22079e-271
Krt8	9.17752e-253	2.59472	0.914	0.107	1.43178e-248
Cldn7	0	2.49285	0.878	0.035	0
Car2	3.20964e-300	2.44223	0.863	0.063	5.00735e-296
Lcn2	3.17585e-261	2.41126	0.934	0.103	4.95464e-257
Cldn4	9.31025e-238	2.301	0.685	0.047	1.45249e-233
Krt7	3.52793e-274	2.29179	0.873	0.077	5.50392e-270
Krt18	1.5252e-293	2.22099	0.873	0.067	2.37947e-289
Cbr2	1.71838e-251	2.20223	0.817	0.071	2.68084e-247
Epcam	0	2.19849	0.807	0.016	0
Wfdc2	3.55639e-280	2.13415	0.878	0.072	5.54833e-276
Sprr1a	1.29159e-223	2.00539	0.563	0.028	2.01502e-219
Cd24a	2.87891e-197	1.94966	0.883	0.122	4.49138e-193
Rnf128	0	1.91703	0.721	0.024	0
Padi1	0	1.91168	0.716	0.024	0
Prap1	1.06424e-283	1.88412	0.533	0.013	1.66032e-279
Sfn	3.1627e-258	1.85325	0.711	0.044	4.93412e-254
Tacstd2	0	1.84608	0.695	0.018	0
Gsto1	1.19954e-158	1.82758	0.873	0.16	1.8714e-154
Tspan1	0	1.79383	0.685	0.015	0
Fxyd3	1.21209e-274	1.77873	0.761	0.046	1.89098e-270
Clca1	1.9306e-303	1.74183	0.574	0.015	3.01193e-299
Cldn3	1.12488e-279	1.71699	0.67	0.03	1.75492e-275
Elf3	3.74199e-278	1.71516	0.635	0.026	5.83788e-274
Urah	4.16345e-263	1.69796	0.645	0.031	6.4954e-259
Plet1	1.57905e-271	1.69695	0.635	0.027	2.46348e-267
Cystm1	1.80048e-258	1.60813	0.67	0.035	2.80893e-254
Fxyd4	6.1155e-227	1.59439	0.726	0.055	9.54079e-223
Tmem213	1.57245e-202	1.57074	0.655	0.05	2.45318e-198
Anpep	2.55079e-177	1.5224	0.67	0.062	3.97949e-173
Muc1	7.40465e-265	1.49556	0.609	0.025	1.1552e-260
Perp	8.94627e-260	1.49436	0.563	0.02	1.39571e-255
Tspan8	3.61792e-267	1.48778	0.579	0.021	5.64432e-263
Alpl	8.52769e-303	1.47795	0.528	0.01	1.33041e-298
Sprr2g	1.23988e-198	1.4604	0.437	0.016	1.93434e-194
Serpina1e	1.06516e-198	1.4256	0.518	0.026	1.66176e-194
F3	4.45585e-97	1.42141	0.69	0.136	6.95157e-93
Spint2	5.03536e-223	1.39129	0.645	0.038	7.85567e-219
Bcat1	3.67281e-175	1.39096	0.563	0.042	5.72996e-171
Ltf	3.66648e-183	1.39053	0.711	0.067	5.72008e-179
Ckmt1	4.51705e-269	1.38797	0.533	0.015	7.04704e-265
Phlda1	3.36518e-60	1.33216	0.848	0.373	5.25002e-56
Cndp2	8.97849e-163	1.31919	0.665	0.066	1.40073e-158
Hbegf	1.31513e-155	1.31509	0.543	0.044	2.05173e-151
Padi2	3.16187e-180	1.29792	0.548	0.036	4.93283e-176
Anxa1	1.37577e-76	1.29287	0.888	0.318	2.14633e-72
Mrps6	4.45623e-117	1.25066	0.66	0.096	6.95217e-113
Gm23935	2.74315e-30	1.24516	0.335	0.081	4.27958e-26
Ddx39	1.19634e-122	1.23164	0.629	0.081	1.86641e-118
Dhcr24	4.88071e-190	1.22117	0.538	0.031	7.6144e-186
Ceacam1	1.51071e-275	1.21186	0.503	0.011	2.35686e-271
Fdps	8.1662e-133	1.21095	0.574	0.061	1.27401e-128
Cxcl17	5.68959e-244	1.19962	0.472	0.012	8.87634e-240
Ezr	6.64403e-105	1.19025	0.599	0.086	1.03654e-100
Golm1	6.32903e-170	1.18447	0.518	0.034	9.87392e-166
Ass1	6.21813e-210	1.1821	0.477	0.018	9.70091e-206
C3	5.64346e-113	1.16746	0.629	0.087	8.80436e-109
Slc44a4	4.92885e-280	1.15971	0.406	0.003	7.6895e-276
Kcnk1	3.80427e-185	1.14848	0.523	0.03	5.93505e-181
Rab25	4.37859e-176	1.14171	0.472	0.025	6.83103e-172
Enpp3	3.17901e-289	1.13976	0.477	0.007	4.95957e-285
Cdh1	4.16478e-237	1.13894	0.437	0.01	6.49748e-233
Lamc2	9.37483e-212	1.13697	0.487	0.019	1.46257e-207
Ran	4.56468e-74	1.13467	0.827	0.259	7.12136e-70
Muc4	6.17284e-253	1.1329	0.376	0.003	9.63024e-249
Ldha	4.28147e-69	1.13205	0.863	0.321	6.67953e-65
Gm14005	1.73491e-188	1.11971	0.401	0.013	2.70664e-184
Cfb	8.22879e-237	1.11753	0.426	0.009	1.28377e-232
Spink12	9.48004e-164	1.1024	0.376	0.015	1.47898e-159
Gsta4	3.08178e-210	1.08686	0.431	0.013	4.80788e-206
Hmgn2	1.6578e-64	1.03909	0.675	0.171	2.58634e-60
Eno1	3.99796e-72	1.03846	0.736	0.189	6.23722e-68
Nrtn	4.94237e-176	1.02202	0.467	0.024	7.71059e-172
Hddc2	5.02299e-128	1.01986	0.467	0.038	7.83636e-124
Ppia	2.70307e-64	1.01533	0.924	0.591	4.21705e-60
Dbi	3.5515e-57	1.01018	0.858	0.364	5.5407e-53
Tmem45b	1.32286e-219	1.00756	0.406	0.009	2.0638e-215
St14	3.56753e-235	0.998481	0.365	0.004	5.56571e-231
Pclaf	1.79582e-125	0.99675	0.416	0.03	2.80165e-121
Gng5	1.57216e-55	0.993133	0.883	0.408	2.45273e-51
Sftpd	1.60454e-180	0.990922	0.426	0.017	2.50324e-176
Serinc2	9.45048e-171	0.988222	0.401	0.016	1.47437e-166
H2afz	4.14409e-55	0.98658	0.827	0.341	6.4652e-51
Nme1	1.17933e-59	0.982979	0.772	0.245	1.83987e-55
Ybx1	1.43549e-56	0.979656	0.863	0.41	2.23951e-52
Rnpep	4.56939e-104	0.979263	0.467	0.05	7.1287e-100
Ndufa11	1.74331e-58	0.970918	0.822	0.288	2.71974e-54
Tpi1	6.62898e-59	0.966938	0.706	0.196	1.03419e-54
Gm12338	2.20722e-73	0.953498	0.645	0.136	3.44349e-69
Erh	1.93462e-57	0.951565	0.746	0.23	3.0182e-53
Oit1	1.81477e-205	0.947439	0.355	0.006	2.83122e-201
Dstn	2.17588e-53	0.946242	0.66	0.19	3.39459e-49
Psmb5	3.74212e-62	0.94221	0.604	0.138	5.83808e-58
Plpp2	3.14766e-146	0.939703	0.386	0.019	4.91067e-142
mt-Nd3	2.43187e-43	0.938449	0.777	0.294	3.79396e-39
Slc39a4	3.40696e-172	0.937554	0.426	0.019	5.3152e-168
Mfsd4a	3.25687e-228	0.935516	0.36	0.004	5.08104e-224
Serpinb1a	1.19544e-96	0.927991	0.431	0.045	1.86501e-92
Hmgb2	6.56414e-75	0.924217	0.503	0.081	1.02407e-70
Atp5g1	1.72249e-52	0.921349	0.817	0.302	2.68726e-48
Ncoa7	1.01558e-92	0.897081	0.442	0.05	1.58441e-88
Hnrnpa2b1	3.81984e-55	0.895555	0.812	0.285	5.95934e-51
Trim15	6.20422e-179	0.895226	0.31	0.006	9.6792e-175
4833423E24Rik	1.43819e-183	0.893465	0.365	0.01	2.24372e-179
Sec11c	8.40655e-79	0.89271	0.574	0.098	1.31151e-74
Tmprss4	7.80597e-158	0.88981	0.34	0.012	1.21781e-153
Smim22	2.68975e-127	0.888052	0.35	0.019	4.19628e-123
Lad1	1.32738e-171	0.887851	0.325	0.008	2.07085e-167
S100g	2.29501e-85	0.883597	0.274	0.019	3.58044e-81
Ccnb2	4.34245e-117	0.873774	0.32	0.017	6.77466e-113
Aqp5	4.56642e-130	0.868619	0.284	0.01	7.12406e-126
G6pdx	6.1833e-92	0.868116	0.401	0.041	9.64657e-88
Ube2c	2.12024e-118	0.868095	0.325	0.017	3.30779e-114
Cox5a	2.95401e-47	0.86633	0.822	0.346	4.60856e-43
Gm9800	1.68004e-76	0.8612	0.452	0.064	2.62103e-72
Hspd1	5.01133e-68	0.861027	0.609	0.127	7.81818e-64
Lsr	2.36015e-147	0.856943	0.396	0.02	3.68208e-143
Birc5	1.7674e-88	0.854856	0.315	0.025	2.75732e-84
Eif5a	2.03031e-45	0.852098	0.868	0.467	3.16749e-41
Sem1	1.55074e-44	0.843901	0.853	0.396	2.41931e-40
Nhp2	2.38739e-51	0.842409	0.645	0.178	3.72456e-47
2200002D01Rik	4.90192e-132	0.841018	0.34	0.016	7.64749e-128
F2rl1	1.79774e-176	0.837457	0.299	0.005	2.80465e-172
Sprr2a3	1.01691e-145	0.836918	0.274	0.006	1.58648e-141
Anxa2	7.02215e-48	0.83524	0.924	0.503	1.09553e-43
Cycs	3.91012e-57	0.83118	0.731	0.204	6.10019e-53
Sat1	2.97804e-43	0.829845	0.792	0.305	4.64604e-39
Hnrnpa3	4.48436e-73	0.827007	0.609	0.117	6.99606e-69
Gm42418	1.92625e-20	0.825447	0.421	0.146	3.00514e-16
Skp1a	1.12767e-45	0.824225	0.721	0.244	1.75928e-41
Ndufa4	4.90345e-45	0.819486	0.893	0.469	7.64987e-41
Ranbp1	1.73956e-52	0.816256	0.711	0.209	2.71389e-48
Prom1	4.25966e-122	0.809511	0.284	0.011	6.64549e-118
Crb3	1.27707e-167	0.808817	0.32	0.008	1.99236e-163
Dcxr	1.67518e-87	0.808338	0.426	0.049	2.61344e-83
Gjb2	1.19219e-171	0.807884	0.279	0.004	1.85994e-167
Mgst3	3.71688e-121	0.805699	0.371	0.023	5.79871e-117
Tmc4	1.59914e-159	0.802929	0.371	0.015	2.49481e-155
Tmem14c	3.33243e-57	0.798694	0.635	0.155	5.19892e-53
Mall	2.10545e-118	0.798384	0.254	0.008	3.28471e-114
Atp2c2	5.85452e-237	0.793815	0.32	0.001	9.13363e-233
Pglyrp1	4.14521e-110	0.789795	0.452	0.042	6.46695e-106
Gm15500	1.87722e-41	0.785728	0.66	0.215	2.92865e-37
Gm10039	2.71289e-65	0.784028	0.442	0.071	4.23239e-61
Tgm2	3.46255e-48	0.782217	0.711	0.219	5.40192e-44
1110008P14Rik	4.56491e-69	0.78212	0.391	0.052	7.12171e-65
Cks1b	3.61465e-76	0.780285	0.421	0.055	5.63921e-72
Uchl3	3.92761e-82	0.779007	0.472	0.064	6.12746e-78
Krtcap3	2.83258e-166	0.778524	0.33	0.009	4.41911e-162
1810011O10Rik	1.84684e-65	0.77624	0.431	0.067	2.88125e-61
Gale	1.08267e-129	0.775377	0.294	0.011	1.68907e-125
Rps10-ps2	1.87919e-46	0.771731	0.619	0.175	2.93172e-42
Tpd52l1	4.55371e-176	0.769178	0.32	0.007	7.10424e-172
Gng12	3.07371e-37	0.766408	0.827	0.379	4.79529e-33
Gm8186	4.70826e-52	0.76637	0.624	0.16	7.34535e-48
Car12	1.05271e-132	0.758897	0.264	0.007	1.64234e-128
Sgms2	9.80033e-73	0.758418	0.345	0.039	1.52895e-68
Padi4	3.41379e-166	0.753715	0.299	0.006	5.32585e-162
Pa2g4	1.51299e-78	0.752148	0.569	0.094	2.36042e-74
Ccdc34	7.02739e-84	0.751663	0.391	0.042	1.09634e-79
F11r	6.07158e-80	0.750281	0.406	0.048	9.47227e-76
Suclg1	1.66894e-56	0.746529	0.487	0.096	2.60371e-52
Pdzk1ip1	7.09217e-194	0.746015	0.305	0.004	1.10645e-189
Ndufa12	1.61355e-46	0.745536	0.731	0.232	2.5173e-42
Ap1m2	1.50019e-135	0.744671	0.279	0.008	2.34045e-131
Pycard	1.27007e-70	0.743533	0.462	0.07	1.98143e-66
Banf1	1.72246e-42	0.736312	0.65	0.198	2.68722e-38
Atp1a1	5.13149e-52	0.735884	0.685	0.187	8.00563e-48
Fkbp4	1.55303e-69	0.735855	0.619	0.123	2.42288e-65
Gm13436	8.94258e-37	0.735359	0.645	0.219	1.39513e-32
Pak1ip1	1.51065e-69	0.731002	0.457	0.07	2.35677e-65
Gm10123	2.15048e-47	0.728238	0.503	0.118	3.35496e-43
Cyp51	9.68279e-59	0.726446	0.34	0.047	1.51061e-54
Gprc5a	5.41192e-91	0.725583	0.269	0.016	8.44314e-87
Slc25a5	1.63125e-40	0.725272	0.914	0.485	2.54491e-36
Lsm5	5.86163e-52	0.724169	0.391	0.068	9.14473e-48
Jup	1.02206e-96	0.7169	0.355	0.029	1.59452e-92
Net1	1.39527e-82	0.714094	0.299	0.024	2.17675e-78
Gm11273	3.00119e-46	0.714052	0.406	0.081	4.68216e-42
Psmd3	1.57511e-58	0.713794	0.426	0.072	2.45733e-54
Sypl	1.74382e-64	0.713695	0.553	0.107	2.72054e-60
Tkt	6.39835e-53	0.71349	0.533	0.118	9.98207e-49
Gm8203	1.00855e-55	0.712726	0.396	0.066	1.57343e-51
Slc40a1	1.84008e-108	0.712464	0.371	0.027	2.87071e-104
Snrpe	5.81589e-41	0.709191	0.68	0.219	9.07337e-37
Snrpd1	1.01341e-36	0.707818	0.574	0.174	1.58102e-32
Naaa	1.0588e-96	0.707465	0.376	0.033	1.65183e-92
Wdr89	1.9377e-29	0.704343	0.772	0.348	3.023e-25
Alcam	6.15715e-131	0.70247	0.325	0.014	9.60577e-127
Tyms	2.75635e-87	0.701541	0.376	0.037	4.30018e-83
Cdca3	1.40724e-114	0.69929	0.284	0.013	2.19544e-110
Rnaset2b	2.54267e-55	0.698144	0.543	0.117	3.96682e-51
Tubb4b	1.25695e-39	0.697298	0.553	0.156	1.96096e-35
Atp5b	1.27804e-30	0.697247	0.787	0.399	1.99386e-26
Gapdh	2.57884e-31	0.69549	0.832	0.46	4.02325e-27
Gm14586	7.60264e-32	0.694856	0.69	0.273	1.18609e-27
Uqcrb	1.09477e-32	0.692342	0.817	0.386	1.70796e-28
Ybx3	1.3989e-65	0.688533	0.437	0.067	2.18242e-61
Rpl36al	7.60726e-31	0.687467	0.827	0.396	1.18681e-26
Gm12350	2.70153e-59	0.685799	0.437	0.074	4.21466e-55
Psma3	2.2075e-36	0.678034	0.675	0.23	3.44392e-32
Hnrnpf	2.95392e-36	0.677498	0.619	0.203	4.60841e-32
Gm10288	1.95814e-32	0.675969	0.645	0.239	3.0549e-28
Spc24	8.49898e-91	0.675744	0.289	0.019	1.32593e-86
Ap2s1	2.30158e-43	0.67478	0.619	0.177	3.5907e-39
1810037I17Rik	7.65992e-37	0.674284	0.65	0.217	1.19502e-32
Ppih	5.40322e-60	0.673728	0.264	0.027	8.42957e-56
Muc20	5.83129e-143	0.672138	0.264	0.006	9.0974e-139
Bace2	2.5667e-68	0.671349	0.365	0.046	4.0043e-64
Tmem173	2.81125e-69	0.671124	0.36	0.044	4.38584e-65
Tagln2	8.89958e-36	0.671039	0.761	0.304	1.38842e-31
Fuom	5.16695e-82	0.670509	0.31	0.026	8.06096e-78
Mad2l1	1.77793e-42	0.669666	0.325	0.058	2.77375e-38
Idh3a	5.87302e-67	0.669266	0.396	0.055	9.1625e-63
Rpl31-ps8	1.91437e-34	0.668283	0.635	0.213	2.9866e-30
Prr13	9.72628e-53	0.66782	0.518	0.112	1.5174e-48
Gm3375	3.82914e-65	0.664653	0.269	0.026	5.97384e-61
Fam20c	1.73412e-87	0.663294	0.305	0.023	2.70541e-83
Polr2l	1.05182e-45	0.662733	0.492	0.114	1.64094e-41
Cldn23	1.81859e-169	0.660519	0.279	0.004	2.83718e-165
Gadd45a	2.04602e-40	0.659911	0.569	0.16	3.19199e-36
Rbbp7	1.72514e-34	0.657498	0.574	0.181	2.69139e-30
Eif2s1	4.1199e-49	0.656921	0.503	0.112	6.42746e-45
Tpm3	2.06957e-41	0.656812	0.67	0.207	3.22874e-37
Slc1a5	8.79e-59	0.656719	0.477	0.088	1.37133e-54
Pfn1	8.77945e-33	0.65615	0.873	0.51	1.36968e-28
Pgk1	4.86892e-52	0.651329	0.325	0.048	7.596e-48
Cib1	1.97834e-47	0.651259	0.381	0.07	3.0864e-43
Plscr1	7.24056e-79	0.649277	0.335	0.033	1.1296e-74
Mdh2	1.81849e-43	0.648251	0.68	0.203	2.83703e-39
Sdhd	2.6188e-56	0.648064	0.447	0.081	4.08559e-52
Cox7a2	3.18841e-30	0.647415	0.838	0.406	4.97423e-26
Cenpw	6.76022e-88	0.647054	0.259	0.015	1.05466e-83
Cyb5b	2.70858e-57	0.646616	0.431	0.075	4.22565e-53
Tcp1	2.68826e-45	0.645929	0.528	0.13	4.19396e-41
Cox7c	6.99922e-33	0.6455	0.904	0.552	1.09195e-28
Hist1h2bc	4.20503e-37	0.644247	0.589	0.18	6.56027e-33
Fut2	1.49559e-128	0.641632	0.259	0.007	2.33327e-124
Gsr	3.88793e-99	0.639804	0.33	0.023	6.06557e-95
Rpl38-ps2	2.39317e-33	0.638522	0.457	0.126	3.73359e-29
Hspe1	1.04377e-30	0.638059	0.822	0.388	1.62838e-26
Tex2	2.53431e-64	0.638026	0.279	0.028	3.95378e-60
Set	1.47267e-49	0.637271	0.508	0.113	2.29751e-45
Gm10131	2.50615e-50	0.63725	0.335	0.053	3.90985e-46
1700027J19Rik	3.47407e-43	0.634137	0.34	0.062	5.4199e-39
Gm13461	3.29318e-60	0.633762	0.299	0.035	5.1377e-56
Ets2	1.91864e-50	0.632687	0.497	0.107	2.99327e-46
Gm11478	5.7095e-35	0.632684	0.772	0.292	8.9074e-31
Psmb2	1.81712e-29	0.63037	0.65	0.249	2.83489e-25
Prkab1	2.68202e-58	0.629057	0.315	0.04	4.18421e-54
Spp1	4.54603e-74	0.628863	0.452	0.065	7.09225e-70
Fermt1	3.521e-104	0.628856	0.259	0.012	5.49312e-100
Rpn1	1.98455e-36	0.627888	0.609	0.19	3.09609e-32
Txnrd1	1.09505e-58	0.625627	0.487	0.09	1.70839e-54
Psmb6	6.61806e-35	0.624985	0.766	0.289	1.03248e-30
Cox5b	1.11047e-29	0.624904	0.822	0.367	1.73244e-25
Gmds	1.85272e-84	0.619661	0.325	0.028	2.89043e-80
Gm6274	1.56352e-37	0.619037	0.487	0.128	2.43924e-33
Gm10146	1.9715e-59	0.618791	0.32	0.041	3.07573e-55
Gm3150	1.1835e-45	0.618158	0.33	0.056	1.84637e-41
Rpl6l	4.24003e-34	0.617694	0.538	0.162	6.61488e-30
Npm3	6.27367e-40	0.615778	0.457	0.11	9.78755e-36
Lsm7	1.51119e-43	0.613439	0.594	0.16	2.3576e-39
Ap2m1	4.07999e-36	0.613352	0.558	0.166	6.3652e-32
Farsb	5.11561e-52	0.609834	0.31	0.044	7.98086e-48
Rnaset2a	4.74185e-43	0.609736	0.574	0.15	7.39776e-39
Nop10	1.2194e-28	0.607268	0.685	0.265	1.90238e-24
Vdac2	8.52312e-37	0.603944	0.558	0.164	1.32969e-32
Gm12174	1.10318e-30	0.60353	0.569	0.189	1.72106e-26
Cenpa	2.00732e-57	0.60211	0.325	0.043	3.13162e-53
Gm7536	3.6016e-31	0.601985	0.589	0.199	5.61886e-27
Xpnpep1	4.37619e-57	0.601448	0.365	0.055	6.82729e-53
Atp5o	1.83466e-32	0.600271	0.777	0.306	2.86226e-28
Armc10	2.501e-68	0.60002	0.335	0.038	3.90181e-64
Rpa3	1.1968e-53	0.599326	0.325	0.047	1.86714e-49
Dpy30	8.20982e-45	0.598872	0.431	0.091	1.28081e-40
Thyn1	9.68585e-57	0.598372	0.284	0.034	1.51109e-52
Uqcrfs1	5.08403e-38	0.598159	0.563	0.159	7.9316e-34
Msmo1	6.47121e-68	0.597176	0.299	0.031	1.00957e-63
Cct6a	9.08215e-36	0.596676	0.553	0.163	1.41691e-31
Hmgb1	4.966e-39	0.596019	0.706	0.228	7.74746e-35
Gm15920	2.25002e-61	0.59552	0.279	0.03	3.51026e-57
Hsd17b12	2.50685e-51	0.594277	0.416	0.077	3.91094e-47
Cd2ap	1.03604e-64	0.593269	0.35	0.044	1.61632e-60
Actg1	2.55179e-29	0.592177	0.909	0.629	3.98104e-25
Gm15536	9.23843e-23	0.591337	0.802	0.414	1.44129e-18
Gm6863	1.8753e-37	0.591169	0.579	0.171	2.92566e-33
Crip1	6.84804e-44	0.587622	0.914	0.451	1.06836e-39
Tomm7	9.88615e-33	0.585561	0.711	0.259	1.54234e-28
Ruvbl2	3.508e-61	0.584254	0.35	0.047	5.47283e-57
Msx1	4.95381e-80	0.583846	0.335	0.032	7.72845e-76
Gm11966	1.11307e-58	0.583445	0.31	0.038	1.7365e-54
Gm6136	3.30157e-34	0.583376	0.609	0.198	5.15078e-30
Psmb7	1.09088e-46	0.583164	0.508	0.116	1.70187e-42
Phb	3.10106e-44	0.58147	0.487	0.114	4.83796e-40
Rpl14-ps1	8.29494e-29	0.579765	0.67	0.262	1.29409e-24
Gclm	3.81645e-48	0.578459	0.274	0.037	5.95404e-44
Eif3b	1.0804e-42	0.578021	0.442	0.099	1.68552e-38
Lap3	3.4866e-60	0.577898	0.376	0.055	5.43945e-56
mt-Co1	1.2012e-26	0.577523	0.99	0.864	1.87399e-22
Snrpf	3.278e-33	0.576586	0.589	0.192	5.114e-29
Tpd52	1.51007e-57	0.576221	0.431	0.073	2.35586e-53
Gm16089	4.69054e-51	0.575554	0.32	0.047	7.31771e-47
Gm6061	2.01589e-53	0.574662	0.269	0.032	3.14499e-49
Uqcr11	1.43388e-28	0.574158	0.736	0.296	2.237e-24
Hnrnpa1	2.54647e-38	0.573191	0.442	0.107	3.97274e-34
Cct7	2.79655e-37	0.571915	0.624	0.191	4.3629e-33
Avpi1	1.07975e-66	0.571716	0.33	0.038	1.68451e-62
Gm5561	8.12734e-37	0.569937	0.472	0.122	1.26795e-32
Rps13-ps2	6.02666e-33	0.566894	0.67	0.232	9.40219e-29
S100a11	4.4684e-27	0.566458	0.909	0.559	6.97115e-23
Zfand5	8.08101e-24	0.566404	0.665	0.287	1.26072e-19
Ralbp1	7.75723e-46	0.563165	0.528	0.124	1.21021e-41
Gm10275	2.58543e-31	0.562906	0.569	0.189	4.03353e-27
Tmbim6	3.03861e-26	0.562552	0.706	0.297	4.74053e-22
Gm10076	3.48747e-25	0.561786	0.863	0.434	5.44081e-21
Higd1a	1.0226e-29	0.561761	0.503	0.157	1.59536e-25
Cox7b	7.86915e-27	0.560336	0.807	0.381	1.22767e-22
Ly6a	8.39262e-35	0.56018	0.741	0.273	1.30933e-30
Lsm4	6.40666e-42	0.55938	0.548	0.142	9.99503e-38
Las1l	1.9951e-73	0.559258	0.299	0.028	3.11255e-69
Gm15501	4.95861e-32	0.555983	0.32	0.071	7.73593e-28
Psma6	7.99436e-35	0.555183	0.614	0.195	1.2472e-30
Cct3	6.981e-35	0.553757	0.523	0.15	1.08911e-30
Ccdc124	7.48957e-32	0.552937	0.467	0.133	1.16845e-27
Rps16-ps2	1.84441e-23	0.552641	0.843	0.475	2.87747e-19
Gm5436	5.93676e-44	0.55219	0.289	0.045	9.26194e-40
Gm6394	1.88926e-40	0.550729	0.345	0.067	2.94743e-36
Snrpg	2.05983e-26	0.55065	0.797	0.366	3.21354e-22
Tpt1-ps3	3.14051e-25	0.55029	0.645	0.251	4.89952e-21
Eif4a1	7.35082e-23	0.548438	0.797	0.417	1.1468e-18
Gar1	8.83083e-55	0.547759	0.31	0.041	1.3777e-50
Gm10169	1.06497e-37	0.547698	0.437	0.105	1.66146e-33
Snrpd3	4.78918e-30	0.546456	0.685	0.257	7.4716e-26
Rpl9-ps6	1.30445e-28	0.546301	0.553	0.185	2.03507e-24
Tuba4a	1.10004e-71	0.546006	0.305	0.03	1.71617e-67
Pepd	9.8002e-37	0.541503	0.355	0.076	1.52893e-32
Ppa1	3.43318e-45	0.54143	0.391	0.076	5.35611e-41
Rpl7-ps7	1.16465e-29	0.540682	0.416	0.115	1.81697e-25
Plp2	3.5753e-39	0.540669	0.437	0.103	5.57783e-35
Gm7600	1.22162e-34	0.540285	0.523	0.15	1.90585e-30
RP23-58B7.2	9.83524e-34	0.540064	0.381	0.092	1.5344e-29
Uqcrc1	5.33149e-26	0.539487	0.558	0.2	8.31766e-22
Gm6807	4.69585e-38	0.538846	0.533	0.145	7.326e-34
Prdx1	3.74473e-28	0.53805	0.893	0.558	5.84215e-24
Hspa4	6.08305e-36	0.537633	0.411	0.099	9.49017e-32
Ak2	3.84639e-32	0.535422	0.371	0.091	6.00075e-28
Psma5	1.3708e-32	0.534385	0.523	0.155	2.13858e-28
Anxa7	2.13659e-30	0.532564	0.365	0.091	3.3333e-26
Atp5l	7.33773e-27	0.530693	0.492	0.162	1.14476e-22
Timm17a	1.32492e-34	0.530668	0.462	0.122	2.06701e-30
Psmd1	4.15293e-29	0.530624	0.416	0.116	6.47899e-25
Snrpd2	1.34634e-38	0.529568	0.665	0.202	2.10042e-34
Tomm40	4.64751e-44	0.528551	0.35	0.064	7.25058e-40
Gm9794	1.72653e-21	0.528031	0.67	0.293	2.69356e-17
Selenot	8.80487e-35	0.527407	0.391	0.093	1.37365e-30
Coa3	1.3502e-38	0.526485	0.518	0.136	2.10644e-34
Hnrnpk	1.74289e-22	0.525084	0.787	0.396	2.71908e-18
Gm3531	9.41678e-41	0.524028	0.35	0.067	1.46911e-36
Ncl	1.57623e-30	0.523954	0.599	0.203	2.45908e-26
Gm5812	1.53542e-43	0.52275	0.31	0.051	2.39541e-39
Bzw1	2.97943e-32	0.521486	0.574	0.183	4.64821e-28
Rpl13a	1.01614e-27	0.521118	0.64	0.231	1.58527e-23
U2af1	2.02423e-34	0.518938	0.533	0.155	3.158e-30
Rps24-ps3	3.05941e-27	0.518749	0.371	0.102	4.77299e-23
H2afx	1.52193e-40	0.518372	0.284	0.047	2.37437e-36
Gm21399	4.68185e-37	0.518107	0.274	0.047	7.30415e-33
Rps10-ps1	1.88534e-33	0.517983	0.32	0.069	2.94132e-29
Cct8	4.56391e-28	0.517257	0.589	0.207	7.12016e-24
Eif4a-ps4	4.15093e-32	0.517081	0.289	0.059	6.47587e-28
Actn4	5.63166e-39	0.516824	0.599	0.17	8.78596e-35
Nsun2	7.45072e-45	0.515916	0.31	0.05	1.16239e-40
Psmd14	7.35501e-43	0.515675	0.447	0.099	1.14746e-38
Rpl37rt	6.0292e-19	0.515667	0.736	0.362	9.40615e-15
Vdac1	5.7955e-37	0.515241	0.416	0.099	9.04156e-33
Cd9	2.70354e-29	0.515154	0.746	0.303	4.21779e-25
Eif2s2	7.78457e-22	0.514742	0.802	0.418	1.21447e-17
Polr3k	3.49336e-44	0.513453	0.289	0.044	5.44999e-40
Pigyl	2.18363e-41	0.512256	0.345	0.065	3.40668e-37
Psat1	2.32886e-52	0.511351	0.269	0.033	3.63326e-48
Btf3	1.67007e-23	0.511339	0.777	0.361	2.60548e-19
Hnrnpc	2.32272e-28	0.509632	0.716	0.279	3.62368e-24
Ywhaz	4.14526e-28	0.50913	0.574	0.2	6.46701e-24
Uba52	3.14854e-22	0.50849	0.792	0.393	4.91203e-18
Rpl28-ps1	3.48279e-26	0.506894	0.609	0.222	5.4335e-22
Ywhae	1.30849e-27	0.506199	0.66	0.251	2.04137e-23
Mrpl57	2.76247e-35	0.505452	0.437	0.11	4.30973e-31
Npm1	5.0623e-21	0.504719	0.843	0.479	7.8977e-17
Hsp90b1	1.95872e-20	0.504666	0.787	0.421	3.0558e-16
Gm11808	2.1433e-21	0.503948	0.492	0.179	3.34376e-17
Gm6204	1.07113e-23	0.503395	0.553	0.2	1.67107e-19
Rrm1	1.73127e-51	0.501661	0.264	0.032	2.70096e-47
Gm9790	1.11604e-33	0.500501	0.264	0.048	1.74114e-29
Tma7	4.10129e-25	0.499724	0.706	0.289	6.39842e-21
Gm9385	9.13332e-26	0.499343	0.584	0.212	1.42489e-21
Lsm3	1.89487e-46	0.498171	0.284	0.041	2.95618e-42
Dctpp1	1.33325e-47	0.497958	0.33	0.053	2.08e-43
Prdx3	4.67186e-42	0.497648	0.294	0.048	7.28857e-38
Snx7	1.8684e-67	0.49762	0.259	0.022	2.9149e-63
Gm10036	4.23045e-35	0.497352	0.381	0.088	6.59993e-31
Rps27l	1.01612e-19	0.496944	0.812	0.447	1.58525e-15
Ifitm1	4.75286e-50	0.496039	0.447	0.087	7.41493e-46
Uqcrc2	7.60195e-37	0.495567	0.477	0.123	1.18598e-32
Gm10736	2.57267e-23	0.495438	0.934	0.614	4.01363e-19
Gm7808	3.69301e-21	0.494992	0.695	0.298	5.76146e-17
Gm2000	3.77921e-22	0.494912	0.944	0.586	5.89595e-18
Ppil1	4.71265e-50	0.494895	0.264	0.033	7.35221e-46
Gcsh	4.90892e-43	0.494219	0.31	0.051	7.6584e-39
Smdt1	4.81635e-25	0.493969	0.711	0.288	7.51399e-21
Rps15-ps2	3.60058e-29	0.493781	0.35	0.088	5.61726e-25
Rps11-ps1	1.7455e-26	0.493707	0.604	0.221	2.72316e-22
Tuba1c	7.33991e-30	0.492952	0.482	0.145	1.1451e-25
Atp5j	1.01217e-22	0.492723	0.838	0.448	1.57909e-18
Gm4366	4.56323e-26	0.492566	0.594	0.216	7.1191e-22
Timm50	1.35619e-35	0.492348	0.32	0.064	2.1158e-31
Gm14303	2.28548e-18	0.491833	0.853	0.481	3.56557e-14
Gm11539	1.42844e-32	0.491773	0.371	0.089	2.22851e-28
Ebna1bp2	2.19542e-38	0.491544	0.365	0.077	3.42507e-34
Fam96a	7.14998e-46	0.490885	0.431	0.088	1.11547e-41
Cox14	1.37227e-28	0.490127	0.543	0.176	2.14088e-24
Rps3a2	3.24321e-24	0.489689	0.569	0.214	5.05973e-20
Nudc	1.48503e-37	0.489209	0.416	0.096	2.3168e-33
Mrpl11	2.99866e-43	0.489066	0.254	0.035	4.67821e-39
Ptma	3.91953e-30	0.488937	0.97	0.735	6.11486e-26
Stip1	2.29973e-35	0.488099	0.345	0.074	3.5878e-31
Rpl18-ps2	1.69389e-31	0.486498	0.396	0.101	2.64264e-27
Lsm6	3.10401e-36	0.486435	0.426	0.103	4.84256e-32
Fbl	2.68842e-33	0.48521	0.447	0.118	4.1942e-29
M6pr	1.84858e-35	0.48513	0.528	0.148	2.88398e-31
Gm13835	1.10083e-33	0.484646	0.31	0.064	1.71741e-29
Pgd	2.05707e-36	0.48281	0.391	0.089	3.20924e-32
Rpl19-ps11	1.71318e-26	0.482655	0.442	0.136	2.67273e-22
Etfa	9.71617e-36	0.482622	0.457	0.117	1.51582e-31
Rpl36-ps2	3.15397e-24	0.482545	0.401	0.122	4.92051e-20
Mrpl12	1.52322e-37	0.481042	0.396	0.089	2.37637e-33
Psmd12	1.83382e-30	0.480249	0.401	0.105	2.86095e-26
Emc6	3.34265e-42	0.479903	0.442	0.097	5.21487e-38
Rps6-ps4	2.78118e-22	0.478206	0.751	0.348	4.33891e-18
Psma2	7.15844e-22	0.47704	0.635	0.269	1.11679e-17
Psenen	2.35167e-30	0.476202	0.508	0.153	3.66884e-26
Rps25-ps1	1.02778e-23	0.474591	0.487	0.165	1.60344e-19
Arpc5	2.56726e-23	0.474084	0.579	0.22	4.00519e-19
Usp50	3.02371e-27	0.473523	0.254	0.054	4.7173e-23
Ptges3	6.03127e-31	0.473226	0.355	0.085	9.40938e-27
Sumo1	2.87648e-23	0.47246	0.467	0.158	4.4876e-19
Mrpl28	1.69659e-28	0.472459	0.355	0.09	2.64686e-24
Cox6b1	6.29269e-18	0.471932	0.863	0.542	9.81723e-14
Gm11687	2.14863e-30	0.471901	0.269	0.055	3.35208e-26
Clic1	1.51532e-20	0.471476	0.797	0.408	2.36405e-16
Gm15772	4.57355e-23	0.470277	0.528	0.192	7.13519e-19
Ndufab1	1.43866e-24	0.469924	0.553	0.199	2.24446e-20
Polr1d	4.54201e-26	0.469466	0.604	0.222	7.08599e-22
Gnb2	4.34874e-27	0.468646	0.665	0.249	6.78447e-23
Capg	1.86101e-29	0.468148	0.508	0.158	2.90337e-25
Bmyc	3.83978e-42	0.467498	0.289	0.046	5.99044e-38
Vars	9.98829e-44	0.466757	0.284	0.043	1.55827e-39
RP23-288C18.3	8.8557e-23	0.466127	0.386	0.12	1.38158e-18
Prdx5	3.42293e-23	0.46587	0.64	0.256	5.34012e-19
Pfdn2	7.98084e-23	0.465239	0.416	0.135	1.24509e-18
Cyc1	2.00382e-40	0.464858	0.553	0.145	3.12616e-36
Rpl34-ps1	5.69334e-19	0.46421	0.523	0.208	8.88218e-15
Ncstn	6.64895e-32	0.464028	0.254	0.047	1.0373e-27
Atp5j2	1.26708e-17	0.462928	0.792	0.433	1.97678e-13
Ccnd1	2.76223e-58	0.462666	0.284	0.032	4.30936e-54
Gm8430	1.01223e-24	0.461795	0.655	0.258	1.57918e-20
Tbca	2.60832e-26	0.461062	0.645	0.239	4.06923e-22
Uap1	2.60852e-32	0.46055	0.335	0.076	4.06956e-28
Tmem238	1.11756e-55	0.460215	0.289	0.035	1.7435e-51
Rpl7a	1.79266e-16	0.460029	0.761	0.446	2.79673e-12
Asah1	1.88486e-31	0.459956	0.426	0.114	2.94057e-27
Gm6169	1.97562e-49	0.459477	0.259	0.032	3.08217e-45
Ormdl2	1.92905e-48	0.459373	0.294	0.042	3.00951e-44
Pebp1	7.20611e-24	0.459334	0.604	0.233	1.12422e-19
Cops4	4.43179e-36	0.458254	0.492	0.131	6.91404e-32
Uqcr10	2.18322e-20	0.458082	0.741	0.356	3.40604e-16
Dtymk	7.31512e-34	0.457946	0.36	0.082	1.14123e-29
Oaz1-ps	2.53328e-23	0.457886	0.371	0.111	3.95217e-19
Sap18	3.26136e-24	0.457772	0.574	0.214	5.08805e-20
Mrps14	5.63489e-26	0.456497	0.508	0.169	8.79099e-22
Gm13611	8.98908e-28	0.456183	0.416	0.117	1.40239e-23
Rpl35a-ps2	8.77252e-28	0.455684	0.416	0.12	1.3686e-23
Spcs2	1.56348e-20	0.455564	0.553	0.218	2.43919e-16
Gm6265	5.36945e-30	0.455539	0.335	0.079	8.37688e-26
Gm14539	1.74849e-32	0.45501	0.355	0.083	2.72782e-28
Rpf1	6.68453e-44	0.45319	0.279	0.042	1.04285e-39
Cacybp	2.42072e-28	0.451858	0.391	0.107	3.77656e-24
Gm10269	6.40461e-22	0.451741	0.411	0.136	9.99183e-18
Pno1	6.31355e-39	0.449979	0.269	0.043	9.84976e-35
Arpc1b	2.73506e-15	0.449082	0.766	0.446	4.26696e-11
Mrto4	2.26271e-25	0.448979	0.294	0.072	3.53005e-21
Acsl5	1.40346e-43	0.448886	0.289	0.045	2.18953e-39
Psmc5	4.3105e-28	0.448168	0.513	0.16	6.72481e-24
Gm5586	4.67796e-23	0.448034	0.619	0.242	7.29809e-19
Sae1	1.36122e-40	0.447385	0.391	0.081	2.12363e-36
Gm6472	1.18044e-28	0.446981	0.487	0.149	1.8416e-24
Atp5e	1.90781e-18	0.445608	0.812	0.436	2.97637e-14
Rpl35	5.35259e-23	0.445541	0.97	0.757	8.35058e-19
Uqcc2	1.72745e-27	0.445059	0.497	0.156	2.69499e-23
Mdh1	3.54944e-30	0.444734	0.553	0.176	5.53748e-26
Psma1	1.87815e-30	0.444722	0.589	0.191	2.9301e-26
Gm9892	1.79509e-29	0.444304	0.289	0.063	2.80052e-25
Uqcrq	2.18141e-21	0.444248	0.736	0.324	3.40323e-17
Rpl35a	4.84803e-19	0.444098	0.893	0.618	7.5634e-15
Bak1	1.57382e-49	0.443966	0.315	0.046	2.45531e-45
Ndufb2	6.58321e-24	0.442817	0.599	0.226	1.02705e-19
Chchd1	6.39916e-30	0.442324	0.396	0.104	9.98334e-26
Serbp1	3.04436e-21	0.4422	0.726	0.331	4.74951e-17
Chka	3.68423e-29	0.441254	0.259	0.052	5.74776e-25
Gm3699	1.91084e-33	0.440825	0.345	0.076	2.9811e-29
Chchd2	7.36093e-20	0.439424	0.883	0.515	1.14838e-15
Rad23b	3.97224e-30	0.438912	0.431	0.118	6.1971e-26
1110004E09Rik	2.20783e-74	0.438071	0.274	0.022	3.44444e-70
Vmp1	1.30088e-28	0.43803	0.437	0.125	2.02951e-24
Ostc	2.7864e-24	0.438009	0.472	0.155	4.34706e-20
Dnajc15	4.33762e-26	0.437858	0.35	0.094	6.76713e-22
Rpl15	2.50769e-17	0.437832	0.888	0.565	3.91225e-13
Dut	1.53831e-25	0.437224	0.264	0.06	2.39992e-21
Ndufa9	3.35048e-25	0.436491	0.396	0.117	5.22709e-21
Creld2	4.55151e-25	0.43628	0.36	0.101	7.10081e-21
Prelid1	2.17391e-28	0.434567	0.548	0.177	3.39152e-24
Magoh	2.47626e-23	0.433789	0.421	0.135	3.86322e-19
Rps26-ps1	3.89701e-22	0.433261	0.629	0.255	6.07972e-18
Pop5	4.43195e-44	0.432049	0.259	0.036	6.91429e-40
Gpx1	1.37214e-21	0.431359	0.944	0.758	2.14067e-17
Psme2b	4.69819e-31	0.430948	0.299	0.064	7.32965e-27
Ndufv2	2.06396e-24	0.43046	0.492	0.165	3.21998e-20
Cnbp	6.52075e-16	0.430281	0.766	0.41	1.0173e-11
Gtf2f2	1.51959e-37	0.42839	0.259	0.042	2.37072e-33
Gm12254	8.39455e-26	0.428352	0.371	0.104	1.30963e-21
Pfdn1	5.63779e-29	0.428333	0.452	0.131	8.79552e-25
Naca	6.30567e-16	0.42804	0.843	0.529	9.83747e-12
Syngr2	2.30944e-45	0.427721	0.411	0.081	3.60295e-41
Mrpl51	7.76698e-32	0.426957	0.406	0.103	1.21173e-27
Pycr2	8.88737e-47	0.426843	0.284	0.04	1.38652e-42
Prmt1	1.02209e-21	0.425152	0.452	0.157	1.59456e-17
Plaur	7.40534e-31	0.42432	0.33	0.075	1.15531e-26
Hn1	4.88479e-33	0.424202	0.482	0.132	7.62076e-29
Fuca2	4.94918e-53	0.423652	0.31	0.042	7.72122e-49
Mydgf	2.08432e-23	0.423375	0.477	0.163	3.25174e-19
1500011K16Rik	2.00693e-35	0.422922	0.259	0.044	3.13101e-31
Cttn	4.91151e-28	0.422804	0.376	0.1	7.66244e-24
Ndufs5	4.65073e-28	0.422718	0.426	0.121	7.25561e-24
Psmb3	2.61342e-22	0.422705	0.599	0.235	4.0772e-18
Ndufb7	3.33086e-27	0.422393	0.553	0.183	5.19647e-23
Eif6	6.01918e-24	0.421882	0.477	0.16	9.39052e-20
Eif4e2	5.12206e-23	0.421525	0.411	0.13	7.99093e-19
Gm12191	3.92503e-25	0.421393	0.33	0.087	6.12344e-21
Cs	1.51714e-30	0.420812	0.355	0.086	2.36689e-26
Fam3c	4.02846e-35	0.420649	0.299	0.058	6.28481e-31
Strap	1.84989e-26	0.420068	0.411	0.12	2.88602e-22
Mrps25	1.2974e-39	0.419729	0.254	0.038	2.02408e-35
Fam107b	9.63902e-36	0.419191	0.335	0.069	1.50378e-31
Selenoh	1.65805e-34	0.419058	0.447	0.113	2.58673e-30
Mrpl42	1.99631e-25	0.418373	0.467	0.147	3.11444e-21
Cox8a	6.12264e-17	0.417803	0.838	0.504	9.55193e-13
Anp32b	1.04831e-24	0.416245	0.457	0.146	1.63547e-20
Klf6	3.41028e-15	0.416035	0.65	0.333	5.32038e-11
Hsp90ab1	1.33277e-16	0.414941	0.909	0.647	2.07926e-12
Arpc4	7.91657e-30	0.414728	0.386	0.099	1.23506e-25
Timm23	3.84422e-30	0.414583	0.299	0.065	5.99737e-26
Lsm8	2.50689e-28	0.412827	0.294	0.066	3.911e-24
Eif1a	1.83842e-19	0.412184	0.431	0.155	2.86811e-15
Eif3i	4.77784e-27	0.411896	0.528	0.172	7.4539e-23
Pomp	4.30896e-22	0.411836	0.629	0.249	6.72241e-18
Gm12396	3.30362e-40	0.411777	0.279	0.045	5.15398e-36
Arpp19	3.51603e-23	0.411316	0.609	0.235	5.48536e-19
Atp5a1	4.56154e-16	0.410766	0.706	0.37	7.11646e-12
Ctnnb1	6.61068e-30	0.409996	0.584	0.188	1.03133e-25
Mycbp	2.92318e-42	0.409753	0.254	0.036	4.56045e-38
Cisd1	3.60401e-32	0.409208	0.31	0.065	5.62262e-28
Wdr1	1.04427e-40	0.408844	0.523	0.13	1.62916e-36
Ndufc2	3.48636e-25	0.408803	0.548	0.188	5.43907e-21
Mrps33	1.98056e-29	0.408258	0.305	0.068	3.08987e-25
Lrrc59	6.5603e-23	0.407789	0.447	0.149	1.02347e-18
Myl12b	1.41631e-26	0.407738	0.609	0.217	2.20959e-22
Timm13	1.82996e-23	0.40721	0.64	0.248	2.85491e-19
Ppp1r14b	9.39306e-30	0.407062	0.264	0.053	1.46541e-25
Atp5c1	4.31405e-21	0.406855	0.69	0.295	6.73035e-17
Gm10250	5.10656e-19	0.406664	0.406	0.144	7.96675e-15
Mrpl20	8.2702e-29	0.404557	0.472	0.14	1.29023e-24
Rps6-ps3	7.89935e-21	0.404202	0.386	0.125	1.23238e-16
Mrpl46	8.50036e-31	0.403421	0.254	0.048	1.32614e-26
Ndufa3	8.93422e-17	0.402961	0.822	0.431	1.39383e-12
Taldo1	6.52923e-30	0.4024	0.569	0.18	1.01862e-25
Usmg5	1.14678e-16	0.401357	0.797	0.419	1.7891e-12
Park7	2.31067e-22	0.400888	0.69	0.282	3.60488e-18
Bcap31	4.96186e-17	0.400717	0.548	0.233	7.741e-13
Srsf1	3.46882e-41	0.400438	0.269	0.041	5.4117e-37
Atp5d	4.02588e-17	0.399425	0.701	0.337	6.28077e-13
Eef1d	1.92496e-23	0.399121	0.614	0.236	3.00312e-19
Polr2f	1.70564e-29	0.39873	0.437	0.122	2.66097e-25
Arf1	1.11309e-17	0.398165	0.695	0.33	1.73654e-13
Adrm1	4.67733e-28	0.395819	0.35	0.089	7.2971e-24
Smox	1.53648e-45	0.395765	0.31	0.048	2.39707e-41
Lyar	6.88514e-45	0.3955	0.33	0.055	1.07415e-40
Eloc	7.04866e-22	0.394697	0.518	0.189	1.09966e-17
Rps6	2.51298e-17	0.393912	0.909	0.564	3.9205e-13
BC002163	4.2779e-27	0.393382	0.254	0.053	6.67395e-23
Ssr4	1.88154e-18	0.392447	0.67	0.295	2.93539e-14
St13	6.3709e-27	0.392274	0.472	0.145	9.93924e-23
Polr2k	2.62347e-20	0.392036	0.259	0.068	4.09288e-16
1110008F13Rik	1.03869e-28	0.391652	0.477	0.142	1.62046e-24
Ubqln1	9.70461e-28	0.391456	0.32	0.077	1.51402e-23
Mrps34	5.07133e-24	0.391168	0.284	0.07	7.91179e-20
Hnrnpab	1.55409e-25	0.389542	0.543	0.186	2.42454e-21
Txn1	1.3331e-15	0.389023	0.711	0.355	2.07977e-11
Atp5g3	1.4857e-25	0.388707	0.579	0.202	2.31784e-21
Psmc3	2.6816e-22	0.386447	0.518	0.186	4.18357e-18
Metap2	1.24727e-29	0.386421	0.553	0.174	1.94586e-25
Gm4332	2.65169e-17	0.386354	0.315	0.103	4.13691e-13
Ddx1	2.96376e-25	0.386312	0.284	0.068	4.62376e-21
Eif3g	2.47796e-26	0.386296	0.569	0.193	3.86587e-22
Por	9.91353e-30	0.385793	0.34	0.081	1.54661e-25
Ap1s1	5.09082e-34	0.384675	0.391	0.092	7.94219e-30
Psmd2	9.69228e-29	0.38432	0.396	0.106	1.51209e-24
Gm5805	5.63039e-15	0.384183	0.802	0.436	8.78396e-11
Zfp706	4.64921e-26	0.383548	0.503	0.163	7.25323e-22
Rala	7.75257e-31	0.383169	0.406	0.105	1.20948e-26
Pdcd6	1.20961e-24	0.383056	0.467	0.15	1.88711e-20
Atp5f1	1.11943e-18	0.381875	0.645	0.283	1.74642e-14
Lsm2	2.9521e-29	0.38108	0.269	0.055	4.60556e-25
Ebp	1.31551e-39	0.380873	0.274	0.044	2.05233e-35
Ndufb3	1.38905e-22	0.379575	0.452	0.15	2.16706e-18
Mrpl15	9.24924e-32	0.379451	0.335	0.075	1.44297e-27
Calm3	1.62182e-21	0.379084	0.492	0.176	2.5302e-17
Ssu72	1.05957e-22	0.378537	0.416	0.13	1.65304e-18
Ube2a	6.51019e-28	0.378446	0.32	0.076	1.01566e-23
Psma4	7.77818e-22	0.377415	0.462	0.157	1.21347e-17
Aldoa	1.06903e-17	0.376882	0.716	0.335	1.66779e-13
Ube2n	8.82557e-31	0.375531	0.36	0.087	1.37688e-26
Atp5k	1.19045e-16	0.374853	0.731	0.355	1.85722e-12
Tomm5	2.74498e-25	0.373995	0.401	0.117	4.28245e-21
Itga6	2.15252e-55	0.373675	0.269	0.03	3.35815e-51
Rps23-ps1	2.20478e-17	0.372634	0.67	0.297	3.43968e-13
Emg1	1.64607e-27	0.371583	0.401	0.11	2.56804e-23
Rps8	2.00896e-19	0.371554	0.944	0.713	3.13417e-15
Txnl4a	4.15318e-26	0.371195	0.391	0.109	6.47938e-22
Cyba	7.22892e-21	0.370828	0.746	0.334	1.12778e-16
Naa10	7.99268e-22	0.369334	0.264	0.067	1.24694e-17
Gm12918	2.9011e-21	0.369124	0.381	0.12	4.526e-17
Hnrnpm	2.66343e-24	0.369052	0.447	0.141	4.15521e-20
Rpl19	8.30242e-14	0.368659	0.909	0.658	1.29526e-09
Rpl29	2.36565e-12	0.368184	0.787	0.478	3.69065e-08
Ppp4c	1.05081e-36	0.3675	0.355	0.074	1.63937e-32
Ppm1g	6.67588e-28	0.367443	0.294	0.067	1.0415e-23
Mrpl21	1.16517e-29	0.367107	0.345	0.083	1.81778e-25
Psma7	1.2957e-17	0.366486	0.721	0.35	2.02142e-13
Nol7	3.68526e-30	0.366271	0.36	0.088	5.74937e-26
Hspa9	3.90004e-21	0.365935	0.431	0.147	6.08445e-17
Gm10221	6.31425e-19	0.365857	0.315	0.096	9.85087e-15
Psmc1	2.97969e-21	0.365477	0.401	0.131	4.64862e-17
Naxd	6.26997e-28	0.364777	0.34	0.084	9.78179e-24
Tspo	1.59737e-16	0.364405	0.609	0.275	2.49206e-12
Clint1	1.32118e-37	0.362933	0.284	0.049	2.06118e-33
Rpl17-ps10	7.91535e-24	0.362103	0.284	0.071	1.23487e-19
Atp5l2-ps	2.43255e-17	0.361059	0.259	0.075	3.79502e-13
Ier3	6.68462e-22	0.359936	0.751	0.366	1.04287e-17
Ndufb4	1.99922e-24	0.358121	0.543	0.186	3.11898e-20
Clptm1l	9.33507e-26	0.357945	0.35	0.093	1.45636e-21
Bzw2	3.97102e-30	0.357385	0.325	0.074	6.19519e-26
Rack1	3.59976e-13	0.357336	0.853	0.565	5.61598e-09
Psme2	4.72281e-21	0.356442	0.513	0.185	7.36806e-17
Rpsa-ps10	9.7312e-17	0.356078	0.335	0.115	1.51817e-12
Gm11361	1.57024e-13	0.35603	0.858	0.497	2.44973e-09
S100a10	2.34412e-13	0.356008	0.832	0.494	3.65706e-09
Nop58	4.22049e-22	0.355561	0.406	0.129	6.58438e-18
Atp5g2	1.60612e-28	0.354965	0.31	0.071	2.50571e-24
Calr	7.64946e-15	0.354954	0.792	0.445	1.19339e-10
Apex1	3.2273e-28	0.353459	0.289	0.064	5.03491e-24
Tuba1b	2.64535e-17	0.352586	0.609	0.275	4.12702e-13
Gm10177	1.98161e-13	0.352392	0.426	0.18	3.09151e-09
Ubl3	3.09768e-39	0.352326	0.376	0.077	4.83269e-35
Acp1	2.48802e-29	0.352084	0.33	0.077	3.88156e-25
Cct2	1.77836e-25	0.352073	0.442	0.135	2.77442e-21
Rpl5	6.46359e-12	0.350558	0.797	0.532	1.00838e-07
Smarca4	7.09371e-25	0.348916	0.264	0.06	1.10669e-20
Tmed10	6.32968e-18	0.348883	0.685	0.31	9.87493e-14
Sec61g	2.40002e-13	0.347908	0.736	0.366	3.74428e-09
Reep5	1.19574e-17	0.347222	0.569	0.237	1.86547e-13
Phb2	3.34751e-21	0.346163	0.467	0.163	5.22245e-17
Ndufa5	6.4593e-20	0.345749	0.66	0.275	1.00772e-15
Fcf1	8.62768e-24	0.345479	0.34	0.094	1.346e-19
Nap1l1	1.92733e-21	0.345174	0.462	0.16	3.00683e-17
Vamp8	1.05106e-26	0.345026	0.518	0.165	1.63976e-22
Pls3	8.22411e-30	0.344768	0.31	0.069	1.28304e-25
Mrpl52	3.02183e-15	0.344403	0.563	0.25	4.71436e-11
Gm5905	8.31857e-17	0.343504	0.695	0.321	1.29778e-12
Gtf3c6	2.41204e-28	0.343453	0.325	0.078	3.76303e-24
Rpl27	1.15473e-13	0.343227	0.914	0.661	1.8015e-09
mt-Cytb	2.82451e-13	0.343022	0.995	0.96	4.40653e-09
Prelid3b	1.36093e-18	0.342927	0.264	0.074	2.12319e-14
Ewsr1	3.75925e-23	0.342421	0.442	0.142	5.8648e-19
Tm9sf2	1.12592e-22	0.341757	0.289	0.076	1.75654e-18
Commd2	7.52034e-28	0.341499	0.274	0.059	1.17325e-23
Srsf3	1.81534e-19	0.341187	0.594	0.241	2.83211e-15
Snhg3	4.24429e-20	0.340223	0.274	0.075	6.62151e-16
Bccip	1.25935e-24	0.33945	0.299	0.075	1.96471e-20
Samm50	1.29496e-20	0.339052	0.269	0.071	2.02027e-16
Mrpl18	5.26942e-25	0.338719	0.386	0.11	8.22082e-21
Pfdn6	1.98539e-19	0.337996	0.294	0.085	3.09741e-15
Stoml2	2.8265e-27	0.33774	0.33	0.082	4.40962e-23
Gm9493	1.52761e-17	0.337701	0.259	0.075	2.38323e-13
Ndufc1	8.33909e-19	0.337321	0.589	0.24	1.30098e-14
Actr2	3.60717e-26	0.337299	0.305	0.073	5.62755e-22
Nme2	4.29672e-18	0.337272	0.442	0.162	6.70331e-14
Nsmce1	8.03446e-22	0.337174	0.294	0.079	1.25346e-17
Elovl5	2.27168e-35	0.337115	0.421	0.1	3.54404e-31
Ddost	3.99241e-16	0.337086	0.604	0.27	6.22857e-12
Plxnb2	5.2089e-27	0.337046	0.274	0.06	8.1264e-23
Dnajb11	1.17792e-22	0.336653	0.371	0.111	1.83767e-18
Gm8355	3.41606e-23	0.336309	0.386	0.116	5.3294e-19
Psmd11	1.13397e-23	0.335921	0.396	0.119	1.76911e-19
Cct5	3.92345e-19	0.335642	0.584	0.239	6.12097e-15
Srp9	5.8871e-20	0.335341	0.416	0.142	9.18446e-16
Pigt	5.92824e-30	0.335156	0.279	0.057	9.24865e-26
Rps10	6.95153e-15	0.335135	0.878	0.499	1.08451e-10
Gspt1	2.30388e-20	0.335035	0.259	0.068	3.59428e-16
Atp1b3	2.12208e-21	0.334963	0.528	0.194	3.31066e-17
Manf	2.75703e-17	0.33443	0.599	0.263	4.30124e-13
Ctnna1	1.08729e-27	0.334414	0.406	0.112	1.69627e-23
Gltp	1.15245e-33	0.333794	0.259	0.046	1.79794e-29
Rer1	1.07846e-18	0.333737	0.482	0.183	1.6825e-14
Cmpk1	9.48896e-27	0.33369	0.335	0.084	1.48037e-22
H2afy	2.15234e-32	0.332294	0.391	0.094	3.35787e-28
Wdr18	1.79757e-38	0.331897	0.254	0.039	2.80439e-34
1810022K09Rik	1.73633e-17	0.331891	0.528	0.214	2.70885e-13
Ndufs4	1.6989e-21	0.331687	0.426	0.141	2.65046e-17
Denr	8.4823e-21	0.331622	0.325	0.096	1.32332e-16
Ptbp1	1.91187e-19	0.3303	0.543	0.211	2.98271e-15
Ubl4a	4.66796e-21	0.329948	0.345	0.104	7.28249e-17
Nono	9.21858e-25	0.329738	0.447	0.139	1.43819e-20
Gm8730	2.79196e-14	0.327945	0.589	0.273	4.35573e-10
Impdh2	2.10293e-22	0.327861	0.396	0.123	3.28078e-18
Rtn4	2.63026e-17	0.327449	0.543	0.223	4.10347e-13
Ywhah	1.20709e-26	0.32715	0.579	0.193	1.88318e-22
Tmbim1	1.54008e-22	0.325971	0.305	0.081	2.40268e-18
Lman2	5.4173e-21	0.324718	0.442	0.15	8.45153e-17
Mrpl17	3.88001e-22	0.324374	0.386	0.119	6.0532e-18
Uchl5	1.55657e-31	0.324231	0.259	0.048	2.42841e-27
Yrdc	3.4317e-31	0.32397	0.32	0.07	5.35379e-27
Eprs	7.49433e-16	0.323513	0.33	0.115	1.16919e-11
Sfxn1	4.75601e-28	0.323501	0.32	0.076	7.41984e-24
Mrps18c	1.92648e-20	0.322865	0.32	0.094	3.0055e-16
Grpel1	8.5863e-25	0.322223	0.371	0.105	1.33955e-20
Mrps18a	3.4406e-25	0.320987	0.376	0.105	5.36768e-21
Rpn2	2.46684e-16	0.320914	0.528	0.22	3.84852e-12
Ap3s1	2.15026e-24	0.319579	0.279	0.067	3.35463e-20
Mrpl13	2.43043e-21	0.318859	0.33	0.096	3.79171e-17
Errfi1	4.60528e-16	0.318744	0.66	0.31	7.1847e-12
Rab32	4.76489e-36	0.318196	0.254	0.041	7.4337e-32
Nfu1	4.27807e-25	0.317774	0.294	0.071	6.67421e-21
Nars	7.61874e-25	0.317709	0.411	0.121	1.1886e-20
Ddx39b	4.88985e-21	0.317669	0.457	0.158	7.62865e-17
Ahsa1	3.70887e-23	0.31764	0.391	0.119	5.78621e-19
Eny2	1.18982e-17	0.317601	0.401	0.143	1.85624e-13
Chmp2b	1.13029e-20	0.317017	0.315	0.091	1.76336e-16
Dnajc2	2.00488e-39	0.316662	0.279	0.045	3.12781e-35
Snrpa1	2.0096e-24	0.316059	0.416	0.125	3.13518e-20
Cops5	2.7707e-28	0.315602	0.36	0.092	4.32256e-24
Ppp1ca	1.84711e-15	0.315295	0.645	0.297	2.88168e-11
Tmem176a	2.34068e-31	0.314304	0.548	0.161	3.6517e-27
Mtx2	3.6934e-18	0.31426	0.254	0.07	5.76208e-14
Rab11a	3.89747e-25	0.314121	0.604	0.212	6.08044e-21
Polr2j	4.57693e-23	0.313027	0.396	0.121	7.14046e-19
Nudcd2	8.63864e-27	0.312859	0.269	0.059	1.34771e-22
Qsox1	9.55882e-21	0.312596	0.315	0.091	1.49127e-16
Rpl3-ps1	1.02433e-15	0.312135	0.69	0.32	1.59805e-11
2010107E04Rik	2.25454e-15	0.312039	0.701	0.332	3.51732e-11
Rps2	1.8344e-16	0.311568	0.954	0.845	2.86184e-12
Ndufb8	7.07833e-19	0.310046	0.569	0.226	1.10429e-14
Gm10132	1.34334e-12	0.309118	0.35	0.14	2.09574e-08
Kif5b	1.81539e-17	0.308918	0.452	0.169	2.83219e-13
Timm8b	6.16676e-20	0.308083	0.462	0.163	9.62076e-16
mt-Nd1	4.71549e-09	0.308046	0.975	0.927	7.35664e-05
Hprt	1.07649e-15	0.307889	0.274	0.087	1.67943e-11
Hdgf	1.22963e-22	0.30709	0.452	0.149	1.91835e-18
Sec13	2.07846e-16	0.306881	0.477	0.188	3.2426e-12
Ndufa6	2.44959e-16	0.305774	0.701	0.313	3.82161e-12
Gm15459	1.51928e-28	0.30577	0.289	0.063	2.37022e-24
Rpl22l1	2.21711e-11	0.304869	0.853	0.493	3.45892e-07
Elavl1	7.9676e-24	0.304855	0.279	0.068	1.24303e-19
Rbm3	2.48681e-17	0.304654	0.376	0.131	3.87968e-13
Mrpl36	1.70479e-25	0.302738	0.376	0.104	2.65964e-21
Gm11249	1.73432e-16	0.302548	0.279	0.088	2.70571e-12
Pdia6	1.91527e-11	0.301411	0.726	0.392	2.98801e-07
Ube2l3	6.12895e-20	0.299861	0.503	0.185	9.56178e-16
Ipo5	4.81718e-23	0.297989	0.269	0.066	7.51529e-19
Rpl7l1	1.11691e-27	0.297407	0.315	0.074	1.74249e-23
Gm9294	3.88637e-22	0.29717	0.269	0.067	6.06313e-18
Gm15421	1.59202e-20	0.296472	0.365	0.115	2.48372e-16
Gadd45gip1	3.15765e-18	0.295621	0.294	0.089	4.92625e-14
Abracl	2.43622e-21	0.295066	0.447	0.148	3.80074e-17
Nmt1	1.07306e-16	0.294796	0.305	0.098	1.67408e-12
Ostf1	3.31186e-22	0.29396	0.421	0.135	5.16683e-18
Dynll1	3.91537e-13	0.29196	0.766	0.417	6.10837e-09
Vcp	4.5856e-16	0.291659	0.563	0.241	7.15399e-12
Psmd13	1.51939e-26	0.291453	0.335	0.084	2.3704e-22
Eif4g1	5.50099e-19	0.290517	0.31	0.094	8.5821e-15
R3hdm4	7.07791e-26	0.289598	0.34	0.088	1.10422e-21
Fkbp11	5.98771e-14	0.287209	0.269	0.091	9.34143e-10
Rpl27a	1.26702e-08	0.287078	0.843	0.554	0.000197667
Hnrnpu	1.34704e-15	0.286815	0.533	0.226	2.10152e-11
Pdia3	2.12181e-10	0.286686	0.711	0.393	3.31023e-06
Eef1g	6.55056e-10	0.285843	0.807	0.488	1.02195e-05
Atp6v1a	1.1133e-23	0.285595	0.31	0.081	1.73686e-19
Gm9843	1.2147e-14	0.28511	0.695	0.335	1.89506e-10
Rps18-ps3	1.94731e-17	0.284202	0.335	0.11	3.03799e-13
Csnk2b	1.69928e-24	0.283995	0.426	0.128	2.65104e-20
Snrpa	7.43561e-21	0.283898	0.264	0.068	1.16003e-16
Mtch2	2.17269e-19	0.283492	0.431	0.152	3.38962e-15
Gm10086	6.88418e-16	0.283341	0.305	0.1	1.074e-11
Commd1	2.19955e-16	0.282574	0.294	0.094	3.43152e-12
Cbx1	2.50846e-25	0.282207	0.335	0.087	3.91345e-21
Eif4a2	1.16078e-13	0.281664	0.523	0.23	1.81094e-09
Rnf7	1.16077e-20	0.281647	0.371	0.115	1.81091e-16
Cdc42se1	9.22888e-22	0.28116	0.294	0.078	1.4398e-17
Fmc1	1.3846e-23	0.281092	0.315	0.083	2.16012e-19
Ap2b1	2.87082e-19	0.281013	0.264	0.072	4.47876e-15
Mrpl30	3.24611e-20	0.280397	0.457	0.158	5.06426e-16
Ndufb6	2.93861e-21	0.279953	0.599	0.226	4.58452e-17
Tmod3	1.02131e-15	0.278358	0.269	0.085	1.59335e-11
Ube2e1	1.24565e-16	0.278239	0.284	0.089	1.94334e-12
Pdcd6ip	7.764e-21	0.277288	0.305	0.086	1.21126e-16
Rps17	3.70601e-10	0.277262	0.878	0.676	5.78175e-06
C1qbp	1.11582e-25	0.276844	0.421	0.122	1.74079e-21
Naa50	3.58968e-22	0.276359	0.391	0.119	5.60026e-18
Mrps7	1.39295e-22	0.275077	0.294	0.076	2.17315e-18
Sumo3	1.66095e-20	0.274997	0.391	0.125	2.59124e-16
Fkbp2	6.50948e-21	0.273019	0.452	0.153	1.01554e-16
Gipc1	7.12248e-19	0.272993	0.259	0.071	1.11118e-14
Txnl1	8.06873e-18	0.272706	0.421	0.151	1.2588e-13
Zc3h15	1.29361e-19	0.272689	0.299	0.087	2.01816e-15
Gm7730	2.25141e-18	0.272503	0.299	0.09	3.51242e-14
Brix1	1.44676e-14	0.272084	0.284	0.095	2.25709e-10
Abcf1	3.00044e-15	0.271674	0.254	0.079	4.68098e-11
Gm13680	7.52091e-19	0.271501	0.315	0.095	1.17334e-14
Nudt21	1.5037e-20	0.271478	0.289	0.08	2.34592e-16
Cdc37	8.02579e-16	0.271382	0.497	0.203	1.2521e-11
Mrps21	3.37868e-16	0.270978	0.452	0.175	5.27109e-12
Sdf2l1	2.26231e-20	0.270472	0.259	0.067	3.52943e-16
Fuca1	7.07661e-22	0.270385	0.365	0.109	1.10402e-17
Rpl7	6.52027e-10	0.269786	0.919	0.764	1.01723e-05
Sap18b	2.02286e-21	0.269311	0.305	0.084	3.15587e-17
G3bp1	3.07226e-21	0.268974	0.426	0.14	4.79304e-17
Ndufs6	6.14428e-18	0.268231	0.477	0.179	9.58569e-14
Pdia4	6.10818e-20	0.268181	0.32	0.094	9.52938e-16
Puf60	4.65284e-13	0.266978	0.416	0.174	7.2589e-09
Elof1	8.68825e-22	0.265962	0.305	0.083	1.35545e-17
Eif3c	6.79377e-21	0.265936	0.472	0.164	1.0599e-16
Rfk	5.75126e-25	0.265386	0.274	0.064	8.97254e-21
H3f3a	2.45644e-12	0.265129	0.66	0.328	3.83229e-08
Mrps15	2.02185e-20	0.264375	0.284	0.078	3.15429e-16
Rpl6	5.24529e-09	0.263205	0.893	0.672	8.18318e-05
Psme3	1.32562e-22	0.263113	0.284	0.072	2.0681e-18
Anxa4	6.2044e-28	0.262887	0.269	0.056	9.67949e-24
Rheb	4.04511e-15	0.262871	0.492	0.202	6.31077e-11
Snx5	3.60147e-16	0.262709	0.431	0.165	5.61865e-12
Pfdn4	3.35548e-19	0.262121	0.254	0.067	5.23488e-15
Canx	8.68953e-17	0.262112	0.579	0.243	1.35565e-12
Psmc4	1.95898e-17	0.262089	0.426	0.155	3.0562e-13
Rps11	1.92143e-11	0.261369	0.954	0.842	2.99763e-07
Ubl5	3.73867e-12	0.261358	0.624	0.305	5.8327e-08
Dazap1	8.09119e-20	0.260936	0.305	0.088	1.26231e-15
Mrps16	1.45949e-18	0.260892	0.299	0.089	2.27696e-14
Tmem208	6.72618e-17	0.260107	0.34	0.114	1.04935e-12
Mpc2	5.64104e-20	0.259561	0.462	0.161	8.80059e-16
1110004F10Rik	1.31339e-13	0.259341	0.335	0.126	2.04902e-09
Gm8451	6.0703e-14	0.259339	0.325	0.119	9.47028e-10
Gars	4.15327e-20	0.259187	0.289	0.08	6.47952e-16
Gm3788	2.17562e-10	0.258692	0.33	0.14	3.39418e-06
Ccdc12	1.31314e-21	0.258053	0.345	0.101	2.04863e-17
Gm14165	1.37487e-15	0.258045	0.452	0.177	2.14494e-11
Rpl8	1.03955e-10	0.257706	0.924	0.757	1.62181e-06
Emd	3.03364e-18	0.256846	0.279	0.081	4.73278e-14
Golph3	3.40994e-12	0.256443	0.274	0.1	5.31985e-08
Tsg101	5.19996e-18	0.255651	0.315	0.098	8.11245e-14
Adss	5.6098e-25	0.2556	0.284	0.067	8.75185e-21
Llph	4.42637e-19	0.254843	0.381	0.125	6.90558e-15
Tonsl	1.10981e-20	0.254522	0.452	0.153	1.73142e-16
Idh3b	7.41077e-19	0.254025	0.345	0.11	1.15615e-14
2310036O22Rik	2.88761e-16	0.253956	0.325	0.109	4.50496e-12
Arpc2	4.99307e-10	0.253781	0.716	0.409	7.78968e-06
Pkm	1.69896e-13	0.252439	0.614	0.289	2.65055e-09
Tomm22	1.66985e-27	0.25215	0.452	0.129	2.60513e-23
Serp1	1.1342e-11	0.251997	0.624	0.312	1.76947e-07
Ythdc1	5.71416e-16	0.251722	0.31	0.103	8.91467e-12
Ndufa13	1.79279e-10	0.251171	0.711	0.382	2.79694e-06
Psmb8	0.00136632	-0.252142	0.259	0.146	1
Eif3f	0.0342222	-0.257259	0.477	0.31	1
Grn	0.000147054	-0.259974	0.431	0.238	1
Eef2	0.00710254	-0.271995	0.827	0.706	1
Ndufa1	0.0238896	-0.278314	0.452	0.283	1
Ddx5	0.00962392	-0.282045	0.711	0.637	1
Rplp1	2.9313e-06	-0.284543	0.954	0.879	0.0457312
Ly6e	0.00979529	-0.285826	0.685	0.438	1
Tmem234	8.12255e-05	-0.28747	0.376	0.199	1
Rab7	0.0241772	-0.302617	0.335	0.213	1
Gltscr2	0.00845149	-0.307153	0.34	0.207	1
Hspb1	1.0802e-11	-0.309591	0.604	0.287	1.68522e-07
Ftl1	1.98734e-05	-0.317835	0.97	0.894	0.310046
Anapc11	0.0166474	-0.330342	0.345	0.215	1
Cdkn1a	0.00981214	-0.334268	0.34	0.214	1
H2afv	0.0109595	-0.335088	0.31	0.189	1
Cfh	0.00209113	-0.335126	0.279	0.16	1
Commd3	0.0109539	-0.336107	0.284	0.174	1
Lgals3	0.000398549	-0.336941	0.528	0.32	1
Gas5	0.00224999	-0.343547	0.746	0.648	1
Oxct1	0.0353063	-0.355682	0.294	0.191	1
Rpl18a	3.14489e-15	-0.362229	0.954	0.96	4.90634e-11
Hba-a1	1.30547e-08	-0.386127	0.274	0.115	0.000203666
Fos	0.0153335	-0.409829	0.853	0.695	1
Anxa5	0.0393522	-0.419555	0.645	0.513	1
S100a6	0.00138595	-0.448599	0.701	0.575	1
Rps27	8.07891e-17	-0.459072	0.959	0.97	1.26039e-12
Cxcl2	0.0107637	-0.462299	0.274	0.177	1
Ubb	1.23894e-29	-0.506789	0.98	0.974	1.93288e-25
Selenow	0.00118498	-0.512805	0.553	0.514	1
Junb	0.0165075	-0.531138	0.574	0.514	1
Gnas	0.000571443	-0.533078	0.685	0.578	1
Gabarap	0.000300302	-0.534953	0.635	0.552	1
Jun	0.0110724	-0.535896	0.675	0.564	1
Son	0.00104927	-0.581974	0.497	0.482	1
Tceal9	0.000645476	-0.582213	0.543	0.504	1
Igfbp6	0.0188147	-0.613147	0.594	0.482	1
Rcn3	0.0147811	-0.633512	0.391	0.372	1
Bst2	0.00544001	-0.635008	0.401	0.399	1
Btg1	0.00945529	-0.644005	0.269	0.301	1
Tmem50a	0.0384575	-0.662291	0.345	0.333	1
Sec62	0.00293732	-0.668774	0.457	0.435	1
Ctsl	1.53313e-05	-0.685424	0.665	0.61	0.239184
2410006H16Rik	0.0108249	-0.700897	0.249	0.286	1
Rhob	0.0167827	-0.72122	0.249	0.279	1
Flna	0.0173338	-0.730024	0.299	0.31	1
Malat1	0.00143359	-0.735955	0.376	0.392	1
Serpinf1	0.0056886	-0.744679	0.32	0.335	1
Adamts2	0.000943816	-0.746306	0.183	0.257	1
Mfap5	0.00120887	-0.749005	0.538	0.471	1
Ddit4l	0.0225051	-0.756096	0.254	0.277	1
Fth1	4.54099e-25	-0.763983	0.954	0.962	7.0844e-21
Ptms	0.00226977	-0.771741	0.269	0.316	1
B2m	2.43418e-15	-0.783147	0.888	0.881	3.79756e-11
Tpm4	9.75358e-05	-0.793572	0.355	0.393	1
Tpm2	0.0194697	-0.819246	0.289	0.3	1
Selenom	7.13153e-06	-0.836901	0.132	0.255	0.111259
Scpep1	7.85703e-06	-0.840758	0.142	0.264	0.122577
Tpm1	0.0118449	-0.842083	0.31	0.317	1
mt-Rnr1	7.74539e-07	-0.844502	0.589	0.571	0.0120836
Sgk1	0.0048157	-0.857468	0.33	0.346	1
Nedd4	8.26961e-05	-0.86016	0.294	0.357	1
Itm2b	1.96174e-25	-0.872389	0.746	0.768	3.06051e-21
Map1lc3b	1.61572e-07	-0.872738	0.426	0.482	0.00252069
Gstm1	7.23556e-05	-0.875404	0.203	0.293	1
Col6a2	5.98983e-06	-0.898089	0.787	0.601	0.0934473
Psap	0.000202021	-0.901013	0.421	0.429	1
Zfas1	0.000229406	-0.917133	0.203	0.282	1
Emp3	3.1558e-05	-0.92051	0.234	0.316	0.492337
Fxyd5	0.0219073	-0.925629	0.249	0.266	1
Cald1	1.57919e-05	-0.925749	0.228	0.324	0.24637
Chchd10	0.0244514	-0.931165	0.447	0.268	1
Zfp36l1	1.54226e-07	-0.948377	0.264	0.381	0.00240609
Dusp1	5.09972e-11	-0.949923	0.548	0.589	7.95607e-07
Lox	4.80494e-06	-0.951753	0.157	0.273	0.0749618
Rarres2	9.26025e-08	-0.953542	0.365	0.455	0.00144469
Col5a1	1.67385e-05	-0.960929	0.183	0.281	0.261138
Ogn	3.65671e-05	-0.965758	0.34	0.387	0.570483
Cxcl10	0.00143781	-0.970717	0.188	0.255	1
Ifi27l2a	0.00086122	-0.981208	0.305	0.344	1
Osr2	7.84557e-08	-0.981361	0.102	0.26	0.00122399
Htra3	1.4888e-06	-0.988303	0.122	0.255	0.0232268
Lgals1	4.03384e-37	-1.00008	0.868	0.845	6.29319e-33
Spon1	7.43103e-08	-1.00659	0.117	0.27	0.00115932
Bgn	1.00483e-05	-1.01016	0.152	0.264	0.156763
Npc2	2.31681e-09	-1.0117	0.426	0.505	3.61446e-05
Mfap4	6.77166e-05	-1.02108	0.274	0.341	1
Rbp1	0.00707196	-1.03417	0.264	0.291	1
Igf1	7.79788e-07	-1.03817	0.218	0.338	0.0121655
Ppic	3.06972e-10	-1.04775	0.091	0.282	4.78907e-06
Thbs1	0.00175742	-1.05093	0.279	0.32	1
Fstl1	5.77675e-08	-1.05159	0.416	0.463	0.00090123
Hes1	0.00105581	-1.05168	0.467	0.457	1
Fn1	3.08492e-09	-1.06421	0.157	0.329	4.81278e-05
Marcksl1	2.05006e-07	-1.06496	0.147	0.287	0.00319831
Cd63-ps	3.19164e-11	-1.09107	0.193	0.386	4.97928e-07
Ramp2	1.6556e-07	-1.10864	0.254	0.366	0.00258291
Olfml3	8.62644e-09	-1.13647	0.142	0.302	0.000134581
Cd34	7.11764e-10	-1.1419	0.279	0.412	1.11042e-05
Laptm4a	1.15439e-22	-1.14644	0.563	0.665	1.80097e-18
Ltbp4	7.72046e-12	-1.15341	0.091	0.305	1.20447e-07
Aldh1a2	0.000144231	-1.15631	0.305	0.351	1
Crispld2	2.32143e-08	-1.15725	0.239	0.371	0.000362166
Col5a2	3.61593e-11	-1.15832	0.056	0.254	5.64122e-07
Htra1	4.56127e-08	-1.16938	0.335	0.425	0.000711603
Plpp3	6.20232e-10	-1.17786	0.112	0.296	9.67625e-06
Zbtb20	1.5928e-10	-1.19565	0.061	0.252	2.48493e-06
Col4a2	2.87293e-12	-1.20129	0.056	0.273	4.48205e-08
Egr1	3.08473e-16	-1.20542	0.426	0.562	4.81249e-12
Tyrobp	0.003739	-1.20984	0.213	0.26	1
Tcf4	2.08306e-11	-1.2169	0.056	0.26	3.24978e-07
Myl9	2.93702e-07	-1.21865	0.249	0.361	0.00458204
Cd63	6.71982e-43	-1.23469	0.716	0.824	1.04836e-38
Tuba1a	1.58636e-13	-1.23517	0.264	0.453	2.47487e-09
Fbln2	1.91412e-06	-1.23825	0.244	0.342	0.0298622
Col4a1	4.95589e-13	-1.27003	0.173	0.384	7.73168e-09
Serping1	4.50279e-13	-1.27457	0.147	0.377	7.0248e-09
Hspa1a	5.8539e-12	-1.27886	0.503	0.568	9.13266e-08
Mylk	2.00171e-08	-1.2835	0.132	0.293	0.000312287
Col6a4	6.95106e-10	-1.28537	0.289	0.423	1.08443e-05
Prss23	6.90353e-12	-1.30099	0.396	0.499	1.07702e-07
Srgn	1.01285e-15	-1.30694	0.442	0.565	1.58014e-11
Klf9	1.17061e-14	-1.32927	0.056	0.309	1.82627e-10
Gadd45g	6.51722e-15	-1.34552	0.675	0.641	1.01675e-10
Col6a1	3.97554e-12	-1.34626	0.579	0.573	6.20224e-08
Hsd11b2	6.24051e-08	-1.34965	0.173	0.314	0.000973581
Sox4	6.04992e-09	-1.35811	0.168	0.328	9.43849e-05
Cst3	9.51763e-16	-1.3582	0.523	0.619	1.48485e-11
Timp2	1.34537e-14	-1.36863	0.157	0.394	2.09892e-10
Col6a3	1.83541e-08	-1.3736	0.426	0.467	0.000286343
Gsn	2.07612e-16	-1.37956	0.508	0.586	3.23896e-12
Lum	9.39584e-13	-1.3814	0.401	0.516	1.46585e-08
Mfap2	1.43818e-12	-1.40396	0.066	0.285	2.24371e-08
Gas6	3.59969e-16	-1.40477	0.046	0.317	5.61588e-12
Adamts1	2.50835e-10	-1.41101	0.122	0.306	3.91328e-06
Id3	9.40126e-09	-1.42009	0.198	0.349	0.000146669
Dpt	1.21424e-15	-1.42674	0.213	0.444	1.89434e-11
Aebp1	8.77951e-23	-1.43727	0.467	0.636	1.36969e-18
Ccl2	8.94416e-05	-1.44144	0.183	0.276	1
Sparc	1.36138e-41	-1.47368	0.822	0.83	2.12389e-37
Igfbp4	2.25513e-15	-1.48887	0.112	0.363	3.51822e-11
Vim	2.96651e-18	-1.5087	0.264	0.492	4.62804e-14
Lsp1	3.13059e-21	-1.5214	0.289	0.544	4.88403e-17
Maf	8.68516e-17	-1.52425	0.122	0.389	1.35497e-12
Serpinh1	3.8883e-27	-1.5644	0.396	0.634	6.06614e-23
mt-Rnr2	1.11763e-44	-1.57802	0.812	0.904	1.74361e-40
Ctla2a	2.29018e-09	-1.58062	0.411	0.484	3.57292e-05
Mmp14	3.74851e-13	-1.6078	0.34	0.484	5.84805e-09
Mmp2	4.40843e-15	-1.64494	0.117	0.366	6.87759e-11
Mdk	3.01972e-19	-1.67935	0.056	0.368	4.71106e-15
Col1a1	6.33316e-23	-1.70808	0.64	0.676	9.88036e-19
Rnase4	6.14692e-29	-1.76377	0.249	0.58	9.5898e-25
Gpx3	6.36296e-26	-1.82146	0.629	0.714	9.92685e-22
Col1a2	1.29493e-31	-1.83316	0.589	0.711	2.02021e-27
Col3a1	7.57633e-26	-1.86694	0.447	0.63	1.18198e-21
Dcn	9.46411e-41	-1.87172	0.756	0.799	1.4765e-36
Apoe	4.20753e-15	-1.92663	0.624	0.648	6.56416e-11
Selenop	2.82084e-21	-1.99938	0.076	0.4	4.4008e-17
Sparcl1	6.69071e-23	-2.06206	0.076	0.421	1.04382e-18
Nbl1	2.43686e-26	-2.22646	0.076	0.453	3.80175e-22
Igfbp7	1.64837e-58	-2.33072	0.325	0.78	2.57163e-54
Mgp	1.01842e-23	-2.72455	0.183	0.506	1.58884e-19
Cnpy2	0.0556799	-0.272903	0.406	0.274	1
Raly	0.0649432	-0.474058	0.675	0.515	1
Srp14	0.0673305	-0.269554	0.34	0.231	1
Map1lc3a	0.0730001	-0.618725	0.401	0.359	1
Tbcb	0.0853602	-0.319999	0.325	0.22	1
Slc3a2	0.0857862	-0.263446	0.508	0.335	1
Csrp1	0.0866119	-0.66086	0.244	0.255	1
Tmem256	0.0874706	-0.313754	0.35	0.239	1
Lyz2	0.0982518	-1.81733	0.35	0.325	1
Zfp36	0.114499	-0.504091	0.518	0.457	1
Ctsz	0.118678	-0.692102	0.274	0.27	1
Itm2c	0.122811	-0.25737	0.36	0.253	1
Maged1	0.122972	-0.511049	0.289	0.287	1
Ilk	0.136193	-0.641444	0.254	0.251	1
Cd47	0.136856	-0.313169	0.32	0.223	1
Lamp1	0.140185	-0.562525	0.431	0.373	1
Ccl6	0.161642	-0.526705	0.33	0.231	1
Slc25a4	0.162745	-0.426724	0.508	0.427	1
Retnlg	0.17906	-0.7551	0.345	0.241	1
Prpf19	0.184192	-0.34501	0.254	0.181	1
Spon2	0.198537	-0.611357	0.467	0.383	1
Rbm39	0.213599	-0.531484	0.431	0.363	1
Cd74	0.243913	-2.16538	0.477	0.332	1
Ifi27	0.249704	-0.263157	0.335	0.249	1
Mprip	0.250303	-0.37238	0.259	0.191	1
Tsc22d1	0.259347	-0.526281	0.457	0.393	1
Il6st	0.260192	-0.345539	0.31	0.226	1
Gnai2	0.275308	-0.435131	0.447	0.31	1
H2-Ab1	0.280472	-1.6499	0.462	0.319	1
Rabac1	0.280887	-0.60381	0.32	0.289	1
Ccl7	0.282181	-0.770368	0.543	0.362	1
Rhoc	0.348302	-0.3483	0.32	0.237	1
Cyr61	0.367963	-0.527018	0.563	0.448	1
Hspa1b	0.369523	-0.501077	0.279	0.26	1
Rexo2	0.402934	-0.362956	0.31	0.233	1
Shisa5	0.403762	-0.495766	0.32	0.237	1
Clk1	0.449969	-0.347375	0.371	0.277	1
Cd164	0.450656	-0.403206	0.574	0.391	1
Arl6ip5	0.456572	-0.472162	0.259	0.195	1
Slc38a2	0.479636	-0.57415	0.345	0.294	1
Cox7a2l	0.495388	-0.504015	0.396	0.328	1
Adh1	0.497795	-0.597233	0.655	0.447	1
Lamp2	0.505377	-0.502863	0.386	0.324	1
Ccnl1	0.525483	-0.383565	0.35	0.263	1
Gpx4	0.561305	-0.361778	0.421	0.314	1
Selenof	0.575065	-0.32519	0.533	0.42	1
Plk2	0.581194	-0.401449	0.289	0.229	1
Fkbp1a	0.58223	-0.387346	0.533	0.411	1
Ppp1r15a	0.596995	-0.299179	0.401	0.31	1
Litaf	0.609576	-0.321355	0.431	0.333	1
Cyb5a	0.625302	-0.308735	0.487	0.391	1
Fcer1g	0.635372	-0.84925	0.355	0.266	1
Ifitm3	0.640294	-0.269603	0.888	0.763	1
Ctsh	0.64218	-0.427279	0.386	0.292	1
Serinc3	0.680063	-0.556514	0.35	0.265	1
Mfge8	0.694793	-0.443489	0.305	0.241	1
Fosb	0.697971	-0.442727	0.604	0.441	1
Gm8797	0.698472	-0.398167	0.574	0.426	1
Pnrc1	0.720459	-0.282029	0.492	0.371	1
H2-K1	0.73332	-0.362827	0.721	0.534	1
P2ry14	0.745485	-0.686384	0.35	0.285	1
Ramp3	0.746899	-0.672323	0.431	0.336	1
Srsf11	0.760643	-0.404755	0.259	0.228	1
Btg2	0.776897	-0.434233	0.416	0.319	1
App	0.781186	-0.408278	0.264	0.217	1
Nr4a1	0.803214	-0.433144	0.345	0.278	1
Wsb1	0.807088	-0.557531	0.294	0.246	1
Ier2	0.828878	-0.325644	0.65	0.464	1
Aldh2	0.837489	-0.445226	0.259	0.213	1
Prkar1a	0.841126	-0.406844	0.386	0.301	1
Sar1a	0.846345	-0.433544	0.325	0.255	1
Rsrp1	0.87307	-0.514217	0.284	0.239	1
Gm1821	0.894963	-0.393939	0.619	0.444	1
Gabarapl1	0.950984	-0.44701	0.279	0.231	1
Cd81	0.961555	-0.341352	0.548	0.407	1
Ech1	0.969872	-0.461127	0.254	0.211	1
Gpx8	0.994592	-0.466889	0.416	0.319	1

## Sheet: 8 NK
Table S2: Representative genes of each cell cluster
	p_val	avg_logFC	pct.1	pct.2	p_val_adj
Xcl1	0	3.14569	0.751	0.009	0
Cd7	0	2.99462	0.794	0.017	0
Nkg7	0	2.94174	0.815	0.04	0
Ms4a4b	0	2.62821	0.693	0.013	0
Klra8	0	2.61689	0.529	0.006	0
Klra4	0	2.61613	0.545	0.01	0
Il2rb	0	2.58619	0.661	0.024	0
Sh2d2a	0	2.51726	0.624	0.01	0
Klra13-ps	0	2.14934	0.455	0.003	0
Klre1	4.99126e-292	1.99156	0.402	0.002	7.78686e-288
Vps37b	1.47879e-244	2.65633	0.757	0.06	2.30706e-240
Klra7	9.78607e-237	1.87727	0.333	0.002	1.52672e-232
Trbc1	3.90281e-227	2.14316	0.524	0.022	6.08877e-223
Gzmb	2.39983e-224	2.24442	0.317	0.002	3.74397e-220
Ctsw	2.27113e-222	1.94431	0.471	0.016	3.54318e-218
Klrd1	3.59088e-208	1.7892	0.392	0.009	5.60213e-204
Klrk1	1.24337e-207	1.8617	0.392	0.01	1.93978e-203
AW112010	2.21787e-203	2.72818	0.878	0.126	3.46009e-199
Klri2	1.58992e-189	1.54297	0.265	0.001	2.48043e-185
Fasl	1.06738e-183	1.43338	0.275	0.003	1.66522e-179
Ptprcap	1.07362e-183	1.72763	0.344	0.008	1.67495e-179
Lck	1.20384e-183	1.67243	0.397	0.014	1.87812e-179
Irf8	1.30042e-168	2.34149	0.672	0.074	2.02878e-164
Tnfrsf9	2.75403e-158	1.52884	0.291	0.006	4.29657e-154
Cd2	2.36823e-154	1.46461	0.27	0.005	3.69468e-150
Hcst	2.8401e-152	1.63755	0.349	0.013	4.43084e-148
Il2rg	2.48108e-143	1.73958	0.481	0.037	3.87074e-139
Ccl5	3.10386e-137	2.90503	0.614	0.078	4.84233e-133
Gimap4	6.99031e-137	1.54269	0.36	0.018	1.09056e-132
Selplg	9.67451e-137	1.73106	0.45	0.033	1.50932e-132
Rgs1	4.63057e-135	1.95505	0.63	0.077	7.22415e-131
Ptpn22	5.15698e-131	1.45194	0.296	0.011	8.04541e-127
Cd52	5.11866e-130	1.88131	0.857	0.182	7.98562e-126
Rac2	7.75662e-121	1.76711	0.577	0.073	1.21011e-116
Serpinb6b	1.17966e-119	1.58892	0.323	0.017	1.84038e-115
Crem	9.33771e-115	1.97952	0.587	0.085	1.45678e-110
Ptprc	3.3095e-112	1.66797	0.434	0.04	5.16315e-108
Ifngr1	1.21251e-111	2.01233	0.603	0.094	1.89163e-107
Tyrobp	3.26194e-104	1.63854	0.852	0.226	5.08896e-100
Coro1a	7.34204e-94	1.46064	0.545	0.08	1.14543e-89
Rgs2	6.09792e-93	1.80151	0.688	0.15	9.51336e-89
H2-Q6	1.2496e-90	1.50345	0.471	0.062	1.9495e-86
Dennd4a	3.04412e-89	1.39211	0.344	0.031	4.74913e-85
Stk17b	1.35238e-82	1.49166	0.397	0.048	2.10985e-78
Fcer1g	2.0064e-80	1.39969	0.81	0.242	3.13018e-76
Ccr2	2.77385e-80	1.38164	0.323	0.03	4.32749e-76
Dusp5	2.33755e-79	1.58847	0.481	0.078	3.64682e-75
H2-D1	6.33484e-79	1.32146	0.968	0.552	9.88299e-75
Car2	8.40903e-79	1.44747	0.508	0.084	1.31189e-74
Serpinb9	1.41874e-78	1.50201	0.354	0.04	2.21338e-74
Gimap6	4.68286e-75	1.4938	0.386	0.05	7.30573e-71
Bin2	4.83848e-74	1.1743	0.254	0.019	7.54851e-70
Shisa5	1.19285e-73	1.58594	0.714	0.216	1.86096e-69
Cd53	1.18896e-70	1.36013	0.476	0.081	1.85489e-66
Dgat1	1.40673e-65	1.42589	0.328	0.041	2.19463e-61
Igfbp7	3.77211e-55	-2.05075	0.249	0.783	5.88486e-51
Lcp1	2.76565e-54	1.22434	0.418	0.079	4.31469e-50
Gmfg	3.3882e-53	1.25311	0.302	0.042	5.28594e-49
Cd63	7.3079e-53	-1.49299	0.423	0.839	1.14011e-48
Ets1	1.40287e-52	1.20655	0.28	0.037	2.18862e-48
H2-Q7	2.69642e-51	1.30666	0.386	0.073	4.20668e-47
H2-K1	8.99208e-50	1.10976	0.894	0.526	1.40285e-45
Sub1	9.7872e-50	1.24557	0.815	0.412	1.5269e-45
Sh3bgrl3	2.38183e-47	1.24674	0.73	0.328	3.71589e-43
Nr4a2	5.70393e-46	1.26311	0.386	0.082	8.8987e-42
Tnfaip3	3.31925e-45	1.2481	0.492	0.136	5.17836e-41
Sparc	4.14871e-45	-1.52482	0.55	0.845	6.47241e-41
B2m	5.4199e-45	0.667384	1	0.875	8.45559e-41
Arhgdib	1.11442e-44	1.2593	0.365	0.075	1.73861e-40
Laptm5	1.48583e-44	1.17169	0.476	0.123	2.31804e-40
Dcn	4.85849e-44	-1.9115	0.529	0.811	7.57974e-40
Bcl2l11	1.91608e-42	1.00157	0.265	0.04	2.98927e-38
Col1a2	2.58183e-42	-1.93167	0.291	0.727	4.02791e-38
Gpr132	3.30507e-42	1.06424	0.254	0.037	5.15624e-38
Fam107b	3.71993e-41	1.20778	0.333	0.07	5.80346e-37
Tmsb10	6.93922e-38	0.574042	0.984	0.918	1.08259e-33
Ifitm3	1.02128e-37	-1.36448	0.392	0.79	1.59329e-33
Cenpa	1.90341e-37	1.24904	0.265	0.047	2.96951e-33
Pfn1	4.20313e-37	1.04502	0.783	0.515	6.5573e-33
H3f3b	1.4497e-35	0.698939	0.958	0.822	2.26167e-31
Stat3	4.96252e-35	1.35653	0.423	0.128	7.74203e-31
Serpinh1	1.77963e-34	-1.61623	0.201	0.643	2.7764e-30
Spp1	2.37954e-34	1.4216	0.317	0.073	3.71233e-30
Tiprl	4.90838e-34	1.10098	0.302	0.067	7.65756e-30
Cotl1	1.27545e-33	1.06842	0.556	0.218	1.98983e-29
Hilpda	4.47058e-33	1.20805	0.333	0.083	6.97455e-29
Fxyd5	1.17528e-32	1.00312	0.593	0.247	1.83356e-28
Sp100	6.16744e-32	0.921826	0.265	0.053	9.62182e-28
Tmsb4x	8.05075e-32	0.481435	1	0.988	1.256e-27
Ctsl	1.0389e-31	-1.48405	0.169	0.636	1.6208e-27
Isy1	1.48288e-31	1.14794	0.27	0.057	2.31345e-27
Egr1	2.93746e-31	-1.60947	0.138	0.577	4.58272e-27
Evl	3.39268e-31	0.999755	0.259	0.052	5.29292e-27
Zfp36l2	7.98442e-31	1.25144	0.312	0.078	1.24565e-26
Ubald2	1.45674e-30	1.12609	0.317	0.079	2.27267e-26
Id2	3.14572e-30	0.965647	0.566	0.224	4.90763e-26
Aebp1	3.60742e-30	-1.47867	0.233	0.648	5.62794e-26
Col1a1	4.60165e-30	-1.66869	0.37	0.69	7.17903e-26
Col3a1	9.6864e-30	-1.7004	0.27	0.639	1.51118e-25
Ptpn18	2.84384e-29	0.93848	0.307	0.074	4.43668e-25
Rpl32	5.26225e-29	0.504248	0.979	0.94	8.20963e-25
Psmb8	5.64053e-29	1.02328	0.423	0.138	8.7998e-25
Fosl2	1.12142e-28	1.12368	0.46	0.174	1.74953e-24
Laptm4a	2.52226e-28	-1.16526	0.296	0.678	3.93498e-24
Gpx1	1.46365e-27	-0.896032	0.45	0.785	2.28344e-23
Mmp14	5.20266e-27	-1.70087	0.074	0.498	8.11666e-23
Ftl1	6.69886e-27	-0.725163	0.772	0.904	1.04509e-22
mt-Cytb	8.59204e-27	-0.58616	0.899	0.965	1.34044e-22
Hes1	8.8526e-27	-2.09424	0.069	0.478	1.38109e-22
Rnase4	9.07338e-27	-1.39641	0.169	0.583	1.41554e-22
Gadd45g	1.83725e-26	-1.60004	0.365	0.657	2.8663e-22
Nbl1	4.92899e-26	-2.02253	0.048	0.453	7.68972e-22
Gm15427	1.82798e-25	0.718178	0.884	0.602	2.85184e-21
Gpx3	1.49905e-24	-1.42846	0.376	0.728	2.33867e-20
Supt4a	1.56125e-24	0.891219	0.333	0.1	2.43571e-20
Cyr61	1.70838e-24	-1.75773	0.09	0.473	2.66524e-20
mt-Nd4	4.32386e-24	-0.717208	0.778	0.918	6.74566e-20
Hmgb2	7.10434e-24	1.48748	0.302	0.093	1.10835e-19
Rps6	1.0538e-23	0.707297	0.825	0.569	1.64403e-19
Fam49b	1.09632e-23	0.843727	0.254	0.062	1.71037e-19
mt-Nd1	3.25953e-23	-0.633412	0.751	0.939	5.0852e-19
Rpl13	6.63869e-22	0.369029	0.995	0.972	1.0357e-17
Gsn	8.84975e-22	-1.25583	0.28	0.597	1.38065e-17
Sparcl1	2.2821e-21	-1.78463	0.069	0.421	3.5603e-17
Gm11478	4.10549e-21	0.900367	0.566	0.304	6.40498e-17
Cd63-ps	1.13514e-20	-1.49096	0.048	0.393	1.77093e-16
Bhlhe40	1.22518e-20	0.982893	0.508	0.25	1.91141e-16
Jak1	2.09478e-20	0.886927	0.45	0.194	3.26806e-16
Col6a1	3.38087e-20	-1.31446	0.323	0.586	5.27449e-16
Cst3	4.83194e-20	-1.2661	0.291	0.631	7.53831e-16
Prss23	1.84822e-19	-1.28103	0.19	0.51	2.8834e-15
Mgp	1.98049e-19	-2.36573	0.185	0.505	3.08976e-15
Timp2	3.355e-19	-1.32462	0.058	0.399	5.23414e-15
Gm11361	3.51591e-19	0.656163	0.741	0.504	5.48517e-15
Mdk	3.57001e-19	-1.67373	0.042	0.368	5.56957e-15
Lum	4.26615e-19	-1.3652	0.222	0.525	6.65562e-15
Pabpc1	4.6828e-19	0.641302	0.794	0.586	7.30563e-15
Serping1	5.89968e-19	-1.43561	0.053	0.381	9.20408e-15
Cd81	7.44631e-19	-1.13256	0.095	0.431	1.1617e-14
Rarres2	8.15675e-19	-1.19372	0.127	0.467	1.27253e-14
Sox4	1.01184e-18	-1.80128	0.021	0.336	1.57857e-14
Maf	1.44648e-18	-1.3194	0.063	0.392	2.25665e-14
Dpt	2.41148e-18	-1.25028	0.116	0.448	3.76215e-14
Klf4	2.4965e-18	-1.3363	0.063	0.389	3.89478e-14
Rps18	3.80412e-18	0.467982	0.937	0.81	5.93482e-14
Apoe	4.4083e-18	-1.69951	0.365	0.662	6.87739e-14
Cald1	1.2665e-17	-1.40199	0.032	0.334	1.97586e-13
Htra1	1.93324e-17	-1.28728	0.127	0.435	3.01604e-13
Rps6-ps4	6.31963e-17	0.788089	0.587	0.357	9.85925e-13
Fos	1.28557e-16	-0.887962	0.503	0.714	2.00562e-12
Id3	1.42554e-16	-1.49035	0.058	0.356	2.22398e-12
Rps15a	2.13557e-16	0.438547	0.947	0.811	3.3317e-12
Rpl3	2.52369e-16	0.478936	0.889	0.763	3.93722e-12
Saraf	2.56156e-16	0.853137	0.407	0.191	3.99629e-12
Sec11c	3.1252e-16	0.87	0.302	0.114	4.87563e-12
Jun	3.392e-16	-1.04025	0.302	0.584	5.29186e-12
Igfbp4	3.72341e-16	-1.23133	0.069	0.365	5.8089e-12
Cd47	5.91623e-16	0.808533	0.434	0.217	9.2299e-12
Crispld2	6.47554e-16	-1.26103	0.085	0.379	1.01025e-11
Ctsb	1.03604e-15	-0.855655	0.471	0.701	1.61633e-11
Ifitm2	1.15607e-15	-0.778814	0.275	0.585	1.80359e-11
Rnaset2b	1.86109e-15	0.878044	0.317	0.13	2.90349e-11
Mif	1.92225e-15	-0.924275	0.222	0.527	2.99891e-11
Rpl3-ps1	2.45048e-15	0.804421	0.54	0.329	3.82299e-11
Mmp2	3.94933e-15	-1.38981	0.085	0.367	6.16135e-11
Tmed5	5.38458e-15	0.743995	0.302	0.117	8.40049e-11
Mbnl1	7.34533e-15	0.828712	0.407	0.203	1.14595e-10
Tuba1a	9.58958e-15	-0.992488	0.175	0.458	1.49607e-10
Cyba	9.77055e-15	0.599949	0.587	0.343	1.5243e-10
Serpinf1	9.98154e-15	-1.07641	0.069	0.348	1.55722e-10
Gas6	1.2792e-14	-1.23587	0.048	0.317	1.99568e-10
Fosb	1.39631e-14	-1.13343	0.196	0.463	2.17838e-10
Litaf	1.45276e-14	0.744646	0.545	0.327	2.26646e-10
Ltbp4	1.48175e-14	-1.19454	0.042	0.308	2.31168e-10
Ogn	1.49206e-14	-1.17559	0.127	0.398	2.32777e-10
Ier3	1.61891e-14	-1.40064	0.122	0.4	2.52567e-10
Gm15536	2.59151e-14	0.65434	0.603	0.425	4.04301e-10
Ostf1	2.67911e-14	0.794859	0.328	0.14	4.17968e-10
Fstl1	2.91456e-14	-0.982485	0.206	0.474	4.54701e-10
Mfap2	3.44948e-14	-1.28292	0.032	0.287	5.38153e-10
Olfml3	3.54661e-14	-1.2322	0.048	0.307	5.53307e-10
Rpl18a	4.23213e-14	0.306743	0.989	0.958	6.60255e-10
Cyb5a	4.369e-14	-0.917539	0.122	0.41	6.81607e-10
Col6a4	5.24669e-14	-1.19577	0.175	0.429	8.18536e-10
Tsc22d1	7.04894e-14	-0.915035	0.127	0.411	1.09971e-09
Anxa5	9.51484e-14	-0.806934	0.254	0.534	1.48441e-09
Nedd4	1.28867e-13	-1.01926	0.101	0.367	2.01045e-09
Cnbp	1.30393e-13	0.658126	0.614	0.419	2.03426e-09
Selenop	1.6589e-13	-1.28997	0.132	0.396	2.58804e-09
Adamts1	1.68754e-13	-1.34855	0.058	0.309	2.63273e-09
Arpc5	1.74927e-13	0.723243	0.434	0.228	2.72904e-09
Col6a3	1.83324e-13	-1.11847	0.243	0.476	2.86004e-09
Sgk1	2.19295e-13	-1.08683	0.095	0.359	3.42122e-09
Actg1	2.42566e-13	0.539837	0.799	0.635	3.78427e-09
Ramp2	3.28234e-13	-1.00797	0.106	0.373	5.12078e-09
Mfap5	3.48749e-13	-0.942284	0.238	0.487	5.44083e-09
Chchd10	4.78027e-13	-1.66259	0.048	0.289	7.45769e-09
Thy1	6.17226e-13	0.845653	0.296	0.127	9.62934e-09
Hspb1	6.69115e-13	-1.61816	0.069	0.316	1.04389e-08
Hspa1a	7.11054e-13	-0.872348	0.317	0.578	1.10931e-08
Ctsh	9.24157e-13	-1.0221	0.063	0.31	1.44178e-08
Tpm1	9.44513e-13	-1.0286	0.074	0.33	1.47354e-08
Cd34	9.62375e-13	-0.893796	0.153	0.419	1.5014e-08
Col6a2	1.36092e-12	-0.94614	0.481	0.618	2.12317e-08
Col5a2	1.90191e-12	-1.09184	0.026	0.255	2.96717e-08
Igf1	1.94843e-12	-1.06679	0.095	0.344	3.03974e-08
Ifi27l2a	2.01487e-12	-1.07966	0.101	0.355	3.14339e-08
Gng12	2.24304e-12	-0.952697	0.164	0.415	3.49937e-08
Ppic	2.26048e-12	-1.02114	0.048	0.283	3.52657e-08
Prkcdbp	2.32361e-12	-0.947789	0.063	0.308	3.62507e-08
Bst2	2.33355e-12	-0.900328	0.159	0.412	3.64058e-08
Fn1	2.93991e-12	-0.943908	0.079	0.332	4.58656e-08
Rpl37rt	3.18458e-12	0.611424	0.571	0.371	4.96827e-08
Klf9	3.19514e-12	-1.07577	0.069	0.308	4.98474e-08
mt-Nd2	3.35158e-12	-0.503938	0.619	0.826	5.2288e-08
Gm2000	3.4346e-12	0.43253	0.799	0.594	5.35832e-08
Lamp2	3.69443e-12	-0.953988	0.095	0.34	5.76368e-08
Rbp1	4.05074e-12	-1.18387	0.063	0.301	6.31956e-08
Marcksl1	4.30487e-12	-1.03695	0.058	0.292	6.71602e-08
Tcf4	6.02651e-12	-1.12609	0.037	0.26	9.40196e-08
Myl9	6.20917e-12	-1.10779	0.122	0.368	9.68692e-08
Ppp1ca	7.61829e-12	0.656846	0.497	0.306	1.18853e-07
Sumo1	9.2711e-12	0.704566	0.339	0.165	1.44638e-07
Ccl4	1.14043e-11	0.541837	0.27	0.107	1.77918e-07
Adamts2	1.27568e-11	-1.00833	0.042	0.264	1.99018e-07
Plpp3	1.3962e-11	-1.06077	0.069	0.298	2.17822e-07
Scpep1	1.55276e-11	-1.04339	0.048	0.268	2.42246e-07
Serinc3	1.70226e-11	0.603381	0.455	0.259	2.65569e-07
Rpl35	1.98836e-11	0.357519	0.884	0.762	3.10204e-07
Col4a2	2.1004e-11	-0.969708	0.048	0.273	3.27683e-07
Gm13588	2.23324e-11	0.730243	0.413	0.239	3.48408e-07
Snhg18	2.30253e-11	-1.0713	0.037	0.251	3.59218e-07
Hmgn1	2.50902e-11	-0.80457	0.09	0.326	3.91432e-07
Rnaset2a	2.65335e-11	0.702901	0.333	0.163	4.1395e-07
Cmtm7	2.74453e-11	0.704087	0.296	0.133	4.28175e-07
Prdx6	2.85031e-11	0.695063	0.407	0.223	4.44677e-07
Mylk	3.17223e-11	-1.19114	0.069	0.296	4.949e-07
Hsd11b2	3.23598e-11	-1.2352	0.095	0.317	5.04845e-07
Col4a1	4.17947e-11	-0.846045	0.143	0.385	6.52039e-07
Ddx5	5.07479e-11	0.449969	0.783	0.633	7.91718e-07
Rps11-ps1	5.36106e-11	0.691196	0.407	0.232	8.36378e-07
Fth1	6.05043e-11	-0.464507	0.894	0.965	9.43928e-07
Rps27l	6.15306e-11	-0.758515	0.243	0.478	9.59939e-07
Rpl36	6.79166e-11	0.335138	0.931	0.831	1.05957e-06
Aldh1a2	7.20888e-11	-1.15491	0.143	0.36	1.12466e-06
Col5a1	7.6199e-11	-0.919217	0.069	0.287	1.18878e-06
Rps13-ps2	7.68619e-11	0.682579	0.413	0.246	1.19912e-06
Lox	9.60324e-11	-0.961546	0.063	0.278	1.4982e-06
Rps16-ps2	1.00958e-10	0.58599	0.64	0.487	1.57505e-06
Fbln2	1.02127e-10	-1.1245	0.132	0.348	1.59328e-06
Spon1	1.02818e-10	-0.949216	0.058	0.273	1.60406e-06
Clic1	1.33969e-10	0.563872	0.593	0.419	2.09005e-06
Cnpy2	1.3719e-10	-0.915751	0.074	0.292	2.1403e-06
Gpx8	1.60921e-10	-0.75496	0.101	0.336	2.51053e-06
Slc25a4	1.76809e-10	-0.701023	0.196	0.444	2.7584e-06
Emp1	2.10406e-10	-0.845699	0.101	0.33	3.28255e-06
Osr2	2.16346e-10	-1.07987	0.058	0.262	3.37522e-06
Rps27rt	2.31538e-10	0.747893	0.46	0.297	3.61223e-06
Tceal9	2.36721e-10	-0.664861	0.275	0.519	3.69308e-06
Psap	2.49126e-10	-0.888899	0.212	0.44	3.88662e-06
Eef1a1	2.93901e-10	0.325863	0.884	0.731	4.58515e-06
Uba52	3.16182e-10	0.589897	0.582	0.405	4.93276e-06
Calm1	3.55686e-10	0.386005	0.783	0.696	5.54906e-06
Maged1	3.80161e-10	-0.78278	0.079	0.298	5.93089e-06
Lamp1	4.38386e-10	-0.793338	0.159	0.387	6.83926e-06
Thbs1	5.72434e-10	-1.0839	0.116	0.329	8.93055e-06
Bgn	5.97978e-10	-0.966243	0.063	0.268	9.32905e-06
Prdx1	6.0596e-10	-0.607953	0.386	0.586	9.45359e-06
Rps11	6.79435e-10	0.341358	0.931	0.843	1.05999e-05
Arpc1b	7.95482e-10	0.449628	0.64	0.453	1.24103e-05
Srgn	9.35882e-10	0.360617	0.73	0.549	1.46007e-05
Grn	9.67289e-10	-0.948594	0.058	0.258	1.50907e-05
Rhob	1.00164e-09	-0.958419	0.085	0.287	1.56267e-05
Htra3	1.25878e-09	-0.925882	0.058	0.258	1.96383e-05
Eif1	1.39382e-09	0.319777	0.889	0.785	2.17449e-05
Arpc2	1.75815e-09	0.559717	0.571	0.417	2.74289e-05
Mfap4	2.07057e-09	-0.810016	0.132	0.348	3.2303e-05
Tmem176b	2.67002e-09	-0.823968	0.085	0.289	4.1655e-05
Mdh1	2.7799e-09	0.7098	0.339	0.189	4.33692e-05
Ly6e	2.78744e-09	0.335302	0.661	0.44	4.34868e-05
Lsp1	2.84222e-09	-0.703702	0.344	0.54	4.43414e-05
Atf3	3.20994e-09	-0.955775	0.132	0.329	5.00782e-05
Ppia	3.22272e-09	0.465833	0.741	0.601	5.02777e-05
Gm13436	3.50837e-09	0.63088	0.386	0.233	5.47341e-05
Gm9843	3.58922e-09	0.590184	0.497	0.346	5.59954e-05
Selenof	3.68775e-09	-0.605068	0.212	0.438	5.75326e-05
Gltscr2	3.89262e-09	0.608523	0.365	0.206	6.07287e-05
Igfbp6	5.0899e-09	-0.69115	0.291	0.499	7.94075e-05
Srsf5	5.22084e-09	0.601441	0.392	0.231	8.14504e-05
Rpsa	6.01238e-09	0.396531	0.788	0.699	9.37992e-05
Cstb	7.0633e-09	-0.663532	0.185	0.402	0.000110195
Pdia6	7.54099e-09	-0.653221	0.206	0.42	0.000117647
Anxa3	9.61726e-09	-0.736295	0.095	0.292	0.000150039
Ddit4l	1.08956e-08	-0.899515	0.095	0.286	0.000169983
Map1lc3a	1.14335e-08	-0.653401	0.159	0.371	0.000178374
Rps23	1.21655e-08	0.294615	0.91	0.836	0.000189794
Aprt	1.254e-08	-0.802284	0.074	0.261	0.000195636
Hspa1b	1.34414e-08	-0.81099	0.079	0.271	0.000209699
Actr3	1.40723e-08	0.59967	0.386	0.234	0.000219541
Errfi1	1.47438e-08	-0.925911	0.148	0.338	0.000230018
Selenom	2.01843e-08	-0.781328	0.074	0.258	0.000314896
Atpif1	2.28146e-08	-0.667977	0.238	0.444	0.000355931
Flna	2.3646e-08	-0.710739	0.122	0.32	0.000368901
Arpc3	2.99812e-08	0.501422	0.54	0.375	0.000467737
Rpl23a	3.27813e-08	0.307048	0.926	0.806	0.000511422
Spon2	3.35799e-08	-0.70331	0.201	0.397	0.000523881
Gm14303	3.50083e-08	0.460478	0.63	0.494	0.000546164
Calm2	3.51411e-08	0.498747	0.608	0.468	0.000548237
P4hb	3.61841e-08	-0.516278	0.259	0.47	0.000564507
Gm3788	3.92881e-08	0.69583	0.27	0.144	0.000612933
Rps3	5.72495e-08	0.327167	0.899	0.798	0.000893149
Tpt1	5.84794e-08	-0.351986	0.614	0.788	0.000912337
Psme2	6.27226e-08	0.555774	0.339	0.195	0.000978536
Csrp1	6.69673e-08	-0.841408	0.09	0.263	0.00104476
Nupr1	7.7163e-08	-0.662805	0.127	0.322	0.00120382
Calu	8.3216e-08	-0.678638	0.101	0.28	0.00129825
Cxcl10	1.02729e-07	-0.985635	0.09	0.26	0.00160268
Rps15a-ps6	1.06132e-07	0.673924	0.317	0.19	0.00165577
Phlda1	1.12273e-07	-0.742042	0.217	0.408	0.00175157
S100a10	1.20845e-07	0.376569	0.672	0.503	0.0018853
Calr	1.35167e-07	-0.540832	0.275	0.474	0.00210874
Mt1	1.51468e-07	-0.77155	0.228	0.413	0.00236306
Rbm3	1.51492e-07	0.583232	0.265	0.138	0.00236343
Rpl4	2.31185e-07	0.310034	0.873	0.783	0.00360671
Ssr3	2.48594e-07	-0.605615	0.101	0.275	0.00387832
Gabarap	2.54042e-07	-0.453747	0.36	0.567	0.00396331
Ly6a	2.68113e-07	-0.773739	0.132	0.306	0.00418283
Gm10736	2.97542e-07	0.31998	0.815	0.622	0.00464195
Cfl1	3.03294e-07	0.324493	0.81	0.736	0.00473168
Ccl2	3.18281e-07	-1.31203	0.122	0.279	0.00496551
Rpl27a	3.29097e-07	0.442845	0.677	0.563	0.00513425
Fkbp1a	3.46953e-07	-0.49092	0.217	0.428	0.00541281
Mfge8	3.52989e-07	-0.67317	0.085	0.253	0.00550698
Rps16	3.77838e-07	0.345146	0.825	0.753	0.00589465
Crip1	3.93259e-07	0.273869	0.598	0.469	0.00613523
Anxa2	4.24272e-07	0.378518	0.672	0.517	0.00661907
Cd9	4.71952e-07	-0.586522	0.148	0.335	0.00736292
Ptms	4.81352e-07	-0.624886	0.143	0.322	0.00750958
Hnrnpf	4.86302e-07	0.598034	0.344	0.219	0.0075868
Oaz1	6.15183e-07	0.389567	0.714	0.629	0.00959747
Vim	6.18238e-07	-0.64287	0.339	0.488	0.00964512
Tgm2	6.32644e-07	-0.682701	0.09	0.253	0.00986988
Rpl13a	6.41491e-07	0.570814	0.376	0.246	0.0100079
Gpi1	6.42158e-07	0.540181	0.291	0.166	0.0100183
Rps13	1.54154e-06	0.286605	0.767	0.674	0.0240496
Rps23-ps1	1.70482e-06	0.551231	0.429	0.311	0.0265969
Xbp1	2.54966e-06	-0.655115	0.122	0.275	0.0397772
Lgals3	2.58722e-06	-0.834835	0.175	0.34	0.0403632
Gstm1	3.16677e-06	-0.536404	0.132	0.297	0.0494048
Tpm2	3.76473e-06	-0.663892	0.148	0.308	0.0587335
Gm7536	4.23044e-06	0.542789	0.333	0.214	0.0659991
Hn1	4.38853e-06	0.466043	0.259	0.144	0.0684655
Cd164	4.63533e-06	-0.365616	0.238	0.409	0.0723158
Gm7808	4.77867e-06	0.45656	0.439	0.312	0.074552
Prdx2	4.81399e-06	-0.508407	0.18	0.35	0.0751031
Ndufa7	4.84243e-06	-0.475872	0.201	0.372	0.0755468
Myl12b	4.8989e-06	0.499718	0.354	0.231	0.0764277
Uqcrb	4.9584e-06	-0.478373	0.243	0.417	0.077356
Ctsz	5.58951e-06	-0.639105	0.127	0.278	0.087202
Tmem256	5.63439e-06	-0.498018	0.101	0.253	0.0879022
Capzb	5.71632e-06	0.463091	0.503	0.383	0.0891803
Itm2c	6.15486e-06	-0.579472	0.116	0.266	0.0960219
Raly	6.50268e-06	-0.527171	0.407	0.529	0.101448
Ctsd	6.73536e-06	0.255719	0.508	0.364	0.105078
Slc3a2	6.9097e-06	0.561579	0.45	0.338	0.107798
Ube2b	8.21497e-06	0.512114	0.376	0.255	0.128162
Rpl18-ps1	8.58808e-06	0.548855	0.349	0.243	0.133983
Arf4	8.63017e-06	-0.454653	0.238	0.408	0.134639
Ramp3	1.02654e-05	-0.675348	0.201	0.348	0.160151
Surf4	1.25251e-05	-0.416544	0.132	0.292	0.195404
Eef1g	1.33237e-05	-0.379054	0.339	0.514	0.207863
Cdk4	1.39684e-05	-0.508231	0.132	0.285	0.217922
Tmed10	1.42174e-05	-0.413664	0.175	0.338	0.221805
Ppib	1.7232e-05	-0.380379	0.28	0.452	0.268837
Tmed3	1.73992e-05	-0.519289	0.111	0.253	0.271446
Hsbp1	1.79153e-05	-0.467258	0.138	0.288	0.279497
Dbi	1.94598e-05	-0.433177	0.238	0.398	0.303592
Morf4l2	2.12761e-05	-0.402681	0.132	0.282	0.331929
Gm5805	2.34869e-05	0.38875	0.561	0.449	0.366419
P2ry14	2.61968e-05	-0.754525	0.164	0.295	0.408696
H2afz	2.62726e-05	0.412095	0.481	0.36	0.409879
Psme1	2.65418e-05	0.580614	0.323	0.21	0.414078
Junb	2.65794e-05	0.425017	0.619	0.512	0.414666
Fau	2.87503e-05	0.307052	0.725	0.669	0.448534
Sec62	3.10862e-05	-0.466242	0.296	0.444	0.484976
Tmbim6	3.40479e-05	0.445087	0.418	0.313	0.531182
Rpl19	3.42376e-05	0.302827	0.751	0.667	0.534141
Sf3b1	3.67586e-05	0.469948	0.333	0.224	0.573471
Ppp1r15a	3.86138e-05	-0.415365	0.169	0.323	0.602414
Arl6ip5	3.90001e-05	0.4702	0.302	0.193	0.60844
Gm4149	4.15598e-05	0.459476	0.407	0.306	0.648374
Ubl5	4.1974e-05	0.399954	0.434	0.315	0.654837
Hsp90aa1	4.22756e-05	-0.401631	0.365	0.519	0.659541
Swi5	4.45652e-05	-0.388202	0.328	0.492	0.695261
Gm10288	4.64324e-05	0.567328	0.354	0.255	0.724392
Pnrc1	4.66929e-05	0.482393	0.471	0.372	0.728456
mt-Rnr2	5.15778e-05	-0.553423	0.857	0.901	0.804666
Rps15a-ps7	5.34022e-05	0.558582	0.286	0.191	0.833128
Atp5k	5.35765e-05	-0.427011	0.233	0.383	0.835847
Itm2b	5.67953e-05	-0.348237	0.698	0.771	0.886064
Ldha	5.81955e-05	0.39813	0.455	0.343	0.907909
Vasp	5.99018e-05	0.453803	0.254	0.152	0.934528
Tspo	6.26795e-05	0.429341	0.392	0.287	0.977862
Rpl34-ps1	7.03577e-05	0.503515	0.317	0.22	1
Rcn3	7.13754e-05	-0.415925	0.233	0.38	1
Cnn2	7.19936e-05	0.494978	0.328	0.219	1
Lyz2	7.83466e-05	-1.59771	0.201	0.333	1
Ost4	7.99315e-05	-0.388854	0.153	0.294	1
Akr1a1	8.25482e-05	-0.396271	0.254	0.405	1
Hint1	9.0138e-05	-0.371057	0.312	0.472	1
Zfas1	9.28274e-05	-0.550613	0.153	0.285	1
Jund	9.37622e-05	-0.378238	0.259	0.419	1
Rrbp1	0.000108879	-0.416557	0.206	0.353	1
Zfp36	0.000126319	-0.521736	0.333	0.467	1
Igha	0.000135119	-0.293654	0.497	0.399	1
Gm5905	0.00013552	0.402881	0.434	0.336	1
Cops9	0.000136153	-0.358684	0.222	0.369	1
Reep5	0.000182489	0.444032	0.344	0.25	1
Dynlrb1	0.000197014	-0.32246	0.233	0.387	1
Tpm3	0.000208476	0.469657	0.323	0.226	1
Selenow	0.000208963	-0.369388	0.386	0.523	1
H2-Ab1	0.000213031	-1.7269	0.212	0.332	1
Emb	0.00022555	0.546605	0.291	0.199	1
Rpl18	0.000232838	0.266823	0.751	0.703	1
Pdia3	0.00025387	-0.31243	0.275	0.417	1
Pcbp1	0.000268145	-0.288755	0.196	0.343	1
Rbm39	0.000268233	0.394034	0.46	0.362	1
Ccl7	0.000282771	-0.84969	0.265	0.378	1
Elob	0.000285918	-0.348291	0.344	0.493	1
Eno1	0.000290651	0.350776	0.312	0.212	1
Ndufb7	0.000293733	0.352615	0.296	0.197	1
Adh1	0.000325393	-0.700483	0.36	0.463	1
Rpl10a-ps1	0.000336336	0.377469	0.45	0.353	1
Uqcr11	0.000345191	-0.36259	0.19	0.326	1
Ftl1-ps1	0.000345347	-0.414861	0.386	0.488	1
Cox7c	0.000373404	-0.352385	0.46	0.576	1
Malat1	0.000406883	-0.337486	0.254	0.398	1
Dusp1	0.000407348	-0.310468	0.476	0.593	1
Zfp36l1	0.000421549	-0.413622	0.249	0.382	1
Zfand5	0.000427969	-0.340119	0.18	0.314	1
Sec61g	0.000431841	-0.34066	0.259	0.392	1
Minos1	0.000435128	-0.330167	0.349	0.503	1
Rpl9-ps6	0.000442097	0.47235	0.286	0.2	1
Rps21	0.000454771	-0.268913	0.587	0.724	1
Prkar1a	0.000458981	0.385449	0.397	0.301	1
Gm10076	0.000482266	0.308583	0.534	0.452	1
Npc2	0.000562043	-0.398385	0.386	0.507	1
Anxa1	0.000585455	-0.463996	0.233	0.354	1
Ubc	0.000640564	-0.319691	0.852	0.79	1
Retnlg	0.000732476	-0.419156	0.138	0.252	1
Rpl14-ps1	0.000893193	0.466174	0.354	0.279	1
Hsp90b1	0.000990034	-0.363838	0.323	0.447	1
Itgb1	0.00100719	0.414654	0.302	0.22	1
Rpl15	0.00103451	0.268956	0.646	0.579	1
Gm5586	0.00108281	0.463409	0.333	0.258	1
Emp3	0.00127645	-0.299948	0.196	0.318	1
Romo1	0.00128323	-0.390018	0.169	0.279	1
Sri	0.00140046	0.388223	0.317	0.236	1
Ddost	0.00144262	-0.344632	0.18	0.293	1
Gm8186	0.001479	0.490087	0.254	0.181	1
Vapa	0.00171939	-0.351547	0.159	0.268	1
Pebp1	0.00172243	-0.357198	0.153	0.257	1
Ptp4a2	0.00172667	0.28836	0.254	0.169	1
Bsg	0.00177222	-0.327391	0.307	0.431	1
Tma7	0.00185921	0.385889	0.381	0.307	1
Ilk	0.0020736	-0.361635	0.153	0.256	1
Dynll1	0.00211563	-0.275528	0.323	0.441	1
Ndufa12	0.00211714	-0.279065	0.153	0.263	1
Gm9794	0.00228159	0.382106	0.381	0.309	1
Ndufb9	0.00239347	-0.367927	0.243	0.353	1
Nfkbia	0.00274676	-0.375604	0.497	0.567	1
Ube2d2a	0.00278012	0.380794	0.265	0.193	1
Wdr89	0.002923	0.309193	0.439	0.366	1
Mtdh	0.00355805	-0.257312	0.148	0.254	1
Snrpd3	0.00391723	-0.272931	0.18	0.284	1
Wsb1	0.00619012	-0.259695	0.159	0.254	1
Eif3h	0.00683809	0.311139	0.36	0.291	1
Hmgn2	0.00731549	0.475153	0.259	0.194	1
Selenos	0.00767542	-0.297247	0.164	0.255	1
Atp5d	0.00804566	0.352859	0.418	0.353	1
Cox6b1	0.00849284	-0.263482	0.471	0.564	1
RP23-269H21.1	0.00854331	0.408024	0.259	0.197	1
Cox6c	0.00900636	-0.308527	0.545	0.636	1
D8Ertd738e	0.0106301	0.376073	0.339	0.281	1
Uqcr10	0.0109968	-0.276881	0.291	0.381	1
Psma2	0.0119431	0.25247	0.354	0.285	1
Atp5a1	0.0147653	0.300946	0.439	0.385	1
Prdx5	0.0161022	-0.266059	0.196	0.28	1
Ywhaz	0.0161296	0.4089	0.27	0.217	1
Ncl	0.016233	0.38082	0.275	0.221	1
Tra2b	0.0192083	0.294769	0.307	0.248	1
Rps3a2	0.019912	0.43628	0.275	0.231	1
Zyx	0.020362	0.306773	0.296	0.239	1
Btg1	0.0208872	0.366478	0.349	0.297	1
Cox7a2	0.0273597	0.255998	0.471	0.427	1
Gm6204	0.0308561	0.359931	0.259	0.217	1
Gm8730	0.0343238	0.338263	0.339	0.287	1
Rps26-ps1	0.0525994	0.295195	0.312	0.273	1
Gm8430	0.0534308	0.2917	0.317	0.277	1
Rpl10-ps3	0.0613074	0.268156	0.37	0.345	1
Rps19-ps6	0.0663371	0.340036	0.349	0.317	1
Eif3e	0.074355	0.259679	0.28	0.242	1
Rpl31-ps8	0.0773449	0.273173	0.27	0.234	1
Psmb1	0.0893416	0.314975	0.37	0.349	1
Hnrnpa2b1	0.0959771	0.306958	0.339	0.311	1
Hmgb1	0.112609	0.290575	0.28	0.251	1
Cd74	0.1464	-1.85777	0.302	0.341	1
Psmb3	0.204088	0.271136	0.275	0.253	1

## Sheet: 9 DC
Table S2: Representative genes of each cell cluster
	p_val	avg_logFC	pct.1	pct.2	p_val_adj
Cd209a	2.05929e-239	2.45665	0.375	0.003	3.2127e-235
Plbd1	1.66533e-175	2.07636	0.516	0.023	2.59809e-171
Napsa	2.81394e-166	1.90155	0.383	0.011	4.39003e-162
H2-Eb1	1.77857e-161	3.10728	0.961	0.146	2.77474e-157
H2-Aa	3.54992e-156	3.04758	0.977	0.162	5.53823e-152
Bcl2a1d	2.65359e-151	2.02769	0.414	0.016	4.13986e-147
Cd83	1.52698e-146	2.41704	0.742	0.078	2.38224e-142
H2-DMa	5.38796e-117	1.94169	0.492	0.037	8.40576e-113
Il1b	8.95942e-111	2.69467	0.641	0.076	1.39776e-106
H2-Ab1	1.13576e-108	3.10536	0.984	0.303	1.77189e-104
Cd74	1.89675e-107	3.11208	0.992	0.316	2.95912e-103
H2-DMb1	1.69773e-96	1.81257	0.453	0.039	2.64862e-92
Ctss	1.79052e-71	1.39627	0.688	0.125	2.7934e-67
Il1r2	1.92998e-70	2.03458	0.328	0.028	3.01097e-66
Cytip	1.22554e-67	1.6421	0.422	0.051	1.91197e-63
Cd52	3.9957e-63	1.60223	0.766	0.196	6.23369e-59
Tmsb4x	1.05973e-61	1.14722	1	0.988	1.65329e-57
Alox5ap	1.38457e-60	1.59676	0.539	0.096	2.16006e-56
Cst3	3.88083e-59	2.02812	0.977	0.601	6.05448e-55
Ms4a6c	2.20302e-57	1.45426	0.438	0.063	3.43693e-53
Rgs1	1.97659e-54	1.59729	0.508	0.09	3.08367e-50
Clec7a	7.06024e-53	1.53573	0.32	0.036	1.10147e-48
Bcl2a1b	9.79863e-52	1.40239	0.305	0.033	1.52868e-47
Gpr132	2.83033e-47	1.36398	0.312	0.039	4.4156e-43
Gm2a	4.11838e-47	1.50552	0.352	0.05	6.42508e-43
Plek	9.18044e-47	1.36883	0.43	0.074	1.43224e-42
Crip1	1.11377e-44	1.35318	0.883	0.461	1.7376e-40
Syngr2	1.00463e-43	1.54504	0.438	0.086	1.56733e-39
Laptm5	2.65675e-41	1.30101	0.531	0.127	4.1448e-37
Igfbp7	2.78597e-40	-2.21211	0.18	0.777	4.34639e-36
Wfdc17	1.06485e-39	1.3048	0.406	0.076	1.66127e-35
Ms4a4c	1.0753e-39	1.37497	0.266	0.033	1.67758e-35
Spi1	3.71251e-35	1.27023	0.289	0.044	5.79188e-31
Sparc	8.75471e-34	-1.6766	0.453	0.843	1.36582e-29
Nr4a3	8.88408e-34	1.35785	0.273	0.042	1.38601e-29
Lcp1	9.03043e-34	1.2843	0.398	0.086	1.40884e-29
Cd63	2.66865e-33	-1.36959	0.438	0.832	4.16337e-29
Col1a2	4.86277e-33	-2.21042	0.203	0.723	7.58641e-29
Lgals3	4.93242e-33	1.28238	0.711	0.318	7.69506e-29
Tyrobp	5.87079e-32	1.0632	0.68	0.243	9.15903e-28
Dcn	2.9105e-31	-1.83496	0.422	0.81	4.54067e-27
Srgn	1.70516e-30	1.02048	0.859	0.548	2.66022e-26
mt-Cytb	2.7419e-30	-0.800209	0.812	0.967	4.27763e-26
Cd53	3.81332e-30	1.2161	0.391	0.09	5.94916e-26
Fxyd5	1.10569e-29	1.21767	0.633	0.252	1.72498e-25
Ccl4	1.57977e-29	1.57363	0.414	0.104	2.46459e-25
Rilpl2	6.40708e-29	1.26655	0.297	0.056	9.99569e-25
Lgals1	2.45826e-28	-1.10858	0.562	0.857	3.83514e-24
Col3a1	1.02905e-27	-2.18297	0.148	0.637	1.60542e-23
Col1a1	1.87961e-25	-2.00264	0.297	0.687	2.93238e-21
Sub1	4.95335e-25	1.1183	0.727	0.422	7.72772e-21
Serpinh1	5.27043e-25	-1.74749	0.195	0.636	8.2224e-21
Coro1a	6.46506e-25	1.18291	0.367	0.094	1.00861e-20
Lmnb1	3.88592e-23	1.38083	0.281	0.063	6.06243e-19
Ifi30	5.66199e-23	1.2519	0.344	0.09	8.83327e-19
Lilr4b	1.00993e-22	0.95901	0.336	0.083	1.57559e-18
H2-D1	3.20147e-22	0.799816	0.844	0.563	4.99462e-18
Psmb8	4.33969e-22	1.13318	0.43	0.142	6.77035e-18
Fcer1g	7.52016e-22	0.895879	0.609	0.259	1.17322e-17
Col6a1	3.76663e-21	-1.77311	0.188	0.587	5.87632e-17
Rnase4	9.56069e-21	-1.56997	0.133	0.577	1.49156e-16
Gadd45g	1.28893e-20	-1.60107	0.266	0.656	2.01086e-16
Aebp1	2.15028e-20	-1.40508	0.219	0.642	3.35465e-16
Ctsl	3.80283e-20	-1.31977	0.18	0.628	5.9328e-16
Psap	6.99935e-20	1.00962	0.688	0.42	1.09197e-15
Prss23	8.50412e-20	-1.7591	0.086	0.508	1.32673e-15
Mpeg1	3.8379e-19	0.926613	0.258	0.058	5.9875e-15
Cyr61	4.00733e-19	-2.00642	0.055	0.468	6.25184e-15
Laptm4a	1.09974e-18	-1.1056	0.273	0.673	1.7157e-14
Unc93b1	1.592e-18	0.969697	0.289	0.076	2.48368e-14
Mmp14	4.14268e-18	-1.71425	0.07	0.491	6.463e-14
Egr1	9.94233e-18	-1.2307	0.141	0.569	1.5511e-13
mt-Nd4	1.10929e-17	-0.700685	0.68	0.919	1.7306e-13
H2afz	1.33677e-17	1.15547	0.602	0.358	2.08549e-13
Col6a2	8.62893e-17	-1.4172	0.32	0.621	1.3462e-12
Fth1	1.07623e-16	0.696792	0.969	0.961	1.67903e-12
mt-Nd2	1.35243e-16	-0.757789	0.492	0.827	2.10993e-12
B2m	1.94233e-16	0.448053	1	0.877	3.03023e-12
Sh3bgrl3	8.95901e-16	0.935298	0.594	0.34	1.3977e-11
Cd63-ps	1.28345e-15	-1.64624	0.031	0.388	2.00231e-11
Arpc1b	4.76836e-15	0.766286	0.688	0.455	7.43912e-11
Cxcl16	9.52246e-15	1.06617	0.398	0.164	1.4856e-10
Hes1	1.00512e-14	-1.66756	0.109	0.469	1.56809e-10
Jun	1.14328e-14	-1.22111	0.25	0.581	1.78363e-10
Arhgdib	1.61928e-14	0.892291	0.273	0.083	2.52624e-10
Igfbp6	1.74354e-14	-1.21117	0.148	0.5	2.7201e-10
Sparcl1	1.75191e-14	-1.75807	0.07	0.415	2.73315e-10
Rgs2	2.80886e-14	0.969888	0.406	0.169	4.38211e-10
Fstl1	4.71862e-14	-1.27898	0.141	0.472	7.36153e-10
Col6a4	5.23331e-14	-1.56806	0.102	0.427	8.16449e-10
Igfbp4	7.6742e-14	-1.5392	0.031	0.361	1.19725e-09
Htra1	9.45663e-14	-1.41495	0.102	0.431	1.47533e-09
Col6a3	1.46665e-13	-1.45889	0.164	0.475	2.28811e-09
Lum	1.5535e-13	-1.29919	0.195	0.521	2.42362e-09
Maf	3.01797e-13	-1.41887	0.062	0.386	4.70834e-09
H2-K1	3.189e-13	0.569789	0.773	0.536	4.97515e-09
Igf1	4.51156e-13	-1.53089	0.031	0.342	7.03848e-09
Nbl1	7.45476e-13	-1.37914	0.109	0.444	1.16302e-08
Cyba	1.91938e-12	0.750338	0.586	0.348	2.99443e-08
Timp2	2.68365e-12	-1.20352	0.07	0.393	4.18676e-08
Ramp2	4.64558e-12	-1.2014	0.062	0.37	7.24757e-08
Ogn	5.54342e-12	-1.29586	0.094	0.395	8.64829e-08
Map1lc3b	5.93608e-12	-0.836156	0.148	0.49	9.26088e-08
Mdk	9.30533e-12	-1.40481	0.062	0.362	1.45172e-07
Gas6	1.16974e-11	-1.44781	0.031	0.313	1.82491e-07
Nedd4	1.24643e-11	-1.16034	0.062	0.364	1.94456e-07
Taldo1	1.33765e-11	0.941891	0.398	0.193	2.08687e-07
Arpc2	1.54638e-11	0.760429	0.617	0.418	2.4125e-07
Tceal9	1.60919e-11	-0.867119	0.188	0.518	2.51049e-07
Crispld2	2.10273e-11	-1.2619	0.078	0.375	3.28047e-07
Raly	2.72576e-11	-0.935126	0.242	0.533	4.25246e-07
Sox4	2.7659e-11	-1.58836	0.047	0.33	4.31509e-07
Ltbp4	3.00258e-11	-1.22773	0.023	0.304	4.68433e-07
Dpt	3.40514e-11	-1.15363	0.148	0.442	5.31236e-07
Slc25a4	3.65048e-11	-0.849968	0.133	0.442	5.69512e-07
Serping1	3.8943e-11	-1.28644	0.086	0.374	6.07549e-07
Gsn	4.08388e-11	-1.00125	0.336	0.59	6.37127e-07
mt-Nd1	5.2972e-11	-0.48317	0.82	0.933	8.26416e-07
Fau	5.65407e-11	0.489169	0.812	0.667	8.82091e-07
Hsd11b2	8.26622e-11	-1.55954	0.047	0.315	1.28961e-06
Tpm1	9.09134e-11	-1.14477	0.047	0.326	1.41834e-06
Serpinf1	9.79819e-11	-1.07432	0.062	0.343	1.52862e-06
Mfap5	1.08246e-10	-1.04216	0.211	0.484	1.68874e-06
Cd34	1.23481e-10	-1.10402	0.141	0.415	1.92643e-06
Cdkn1a	1.49694e-10	0.868398	0.422	0.213	2.33537e-06
Cald1	1.55267e-10	-1.19381	0.055	0.328	2.42231e-06
Mfap2	1.76045e-10	-1.37399	0.023	0.283	2.74648e-06
Calm1	1.87861e-10	0.50896	0.836	0.695	2.93082e-06
Fn1	2.02404e-10	-1.1444	0.055	0.329	3.1577e-06
Plpp3	2.32711e-10	-1.19551	0.031	0.295	3.63053e-06
Prkcdbp	2.39162e-10	-1.09174	0.039	0.305	3.73117e-06
Tuba1a	2.61415e-10	-0.959109	0.164	0.453	4.07833e-06
Ccl3	2.63745e-10	0.939651	0.305	0.122	4.11468e-06
Id3	3.13746e-10	-1.3913	0.078	0.35	4.89475e-06
Adamts1	3.35701e-10	-1.42973	0.047	0.305	5.23727e-06
Rac2	3.88248e-10	0.705196	0.258	0.093	6.05706e-06
Lsp1	3.9995e-10	0.585178	0.703	0.524	6.23962e-06
Ctsc	4.09232e-10	0.780813	0.281	0.107	6.38443e-06
Klf9	4.40428e-10	-1.13458	0.039	0.305	6.87112e-06
Atox1	4.69153e-10	0.815022	0.555	0.373	7.31926e-06
mt-Co1	5.30789e-10	-0.451704	0.758	0.874	8.28083e-06
Spon1	5.33431e-10	-1.25666	0.023	0.271	8.32205e-06
Cd164	6.42069e-10	-0.953803	0.125	0.41	1.00169e-05
Rarres2	7.76088e-10	-0.874638	0.172	0.46	1.21078e-05
Spon2	7.96686e-10	-1.01748	0.125	0.397	1.24291e-05
Rcn3	8.68331e-10	-0.972448	0.109	0.382	1.35468e-05
Gpx8	1.07063e-09	-0.998511	0.07	0.333	1.67029e-05
Errfi1	1.44329e-09	-1.17846	0.078	0.337	2.25167e-05
Itm2b	1.67038e-09	-0.560365	0.547	0.775	2.60596e-05
Col4a1	2.11399e-09	-0.982353	0.117	0.382	3.29803e-05
Fos	2.30611e-09	-0.7494	0.5	0.711	3.59776e-05
Ucp2	2.78253e-09	0.761379	0.297	0.125	4.34102e-05
Col4a2	2.98384e-09	-1.12317	0.031	0.27	4.6551e-05
Phlda1	3.04245e-09	-0.894115	0.133	0.407	4.74653e-05
Cd81	3.67835e-09	-0.841304	0.148	0.424	5.7386e-05
Fbln2	3.74149e-09	-1.25331	0.102	0.345	5.83709e-05
Actg1	3.81858e-09	0.571767	0.766	0.639	5.95737e-05
Picalm	5.17217e-09	0.694193	0.312	0.138	8.06911e-05
Calu	5.33542e-09	-0.943772	0.039	0.279	8.32379e-05
Gnas	6.80697e-09	-0.618341	0.305	0.593	0.000106195
Osr2	7.33198e-09	-1.1831	0.031	0.26	0.000114386
Ndufa4	7.54707e-09	-0.706328	0.219	0.501	0.000117742
S100a10	9.47737e-09	-0.711972	0.25	0.521	0.000147856
Maged1	9.72789e-09	-0.914654	0.055	0.295	0.000151765
Rbp1	9.88068e-09	-1.2123	0.062	0.297	0.000154148
Rhob	1.03807e-08	-0.928154	0.047	0.285	0.00016195
Ppic	1.17588e-08	-0.981574	0.047	0.279	0.000183449
Tsc22d1	1.17612e-08	-0.886608	0.148	0.405	0.000183487
Anxa3	1.32452e-08	-0.948007	0.055	0.29	0.000206638
Mmp2	1.41936e-08	-1.13898	0.117	0.361	0.000221435
Sgk1	1.54225e-08	-1.04877	0.109	0.354	0.000240607
Olfml3	1.84922e-08	-1.06435	0.07	0.302	0.000288497
Arpc3	1.9518e-08	0.626283	0.562	0.377	0.0003045
Rps11	2.15978e-08	0.409607	0.922	0.845	0.000336948
Aldh1a2	2.16787e-08	-1.16099	0.125	0.357	0.00033821
Gstm1	2.36963e-08	-0.950895	0.062	0.296	0.000369686
Bhlhe40	3.45639e-08	0.715257	0.43	0.257	0.000539231
Zfp36	4.28707e-08	0.48643	0.641	0.454	0.000668825
Mfap4	5.21538e-08	-0.971067	0.109	0.345	0.000813652
Thbs1	5.29893e-08	-0.921425	0.086	0.326	0.000826686
Ctsz	5.84134e-08	0.621128	0.453	0.264	0.000911307
Mif	5.97283e-08	-0.771211	0.266	0.52	0.000931821
Lox	7.46678e-08	-0.917229	0.055	0.275	0.00116489
Rpl22l1	8.23126e-08	-0.651483	0.258	0.521	0.00128416
Arpc5	9.31964e-08	0.700708	0.398	0.233	0.00145396
Adamts2	9.52666e-08	-0.913138	0.047	0.26	0.00148625
Pim1	1.0946e-07	0.605376	0.562	0.388	0.00170769
Rabac1	1.1015e-07	-0.811765	0.07	0.298	0.00171844
Col5a1	1.13256e-07	-0.953712	0.07	0.283	0.00176691
Psme1	1.37762e-07	0.737824	0.375	0.21	0.00214923
P4hb	1.39015e-07	-0.657518	0.219	0.468	0.00216878
Selenop	1.4302e-07	-1.1095	0.164	0.39	0.00223126
Cfl1	1.51581e-07	0.354023	0.805	0.738	0.00236481
Selenom	1.56423e-07	-0.898586	0.047	0.256	0.00244035
Selenof	1.60558e-07	-0.656198	0.18	0.435	0.00250487
Lgmn	2.29609e-07	0.603177	0.281	0.128	0.00358213
Cotl1	2.30297e-07	0.792751	0.391	0.23	0.00359286
Gpx3	2.62032e-07	-1.05533	0.547	0.716	0.00408795
Actb	3.08215e-07	0.518501	0.797	0.753	0.00480846
Rpl18a	3.42839e-07	0.30907	0.969	0.959	0.00534863
Ctsd	3.64315e-07	-0.806986	0.148	0.38	0.00568368
Spcs1	3.86506e-07	-0.662254	0.133	0.359	0.00602989
Gpx4	4.62027e-07	-0.67686	0.102	0.327	0.00720808
Cdk4	4.64788e-07	-0.772651	0.078	0.284	0.00725115
P2ry14	4.69076e-07	-1.04302	0.094	0.296	0.00731805
Ifitm3	4.73181e-07	0.343965	0.859	0.767	0.0073821
Htra3	5.50925e-07	-0.901713	0.055	0.255	0.00859498
Gas5	6.59528e-07	-0.488841	0.414	0.661	0.0102893
Rps29	6.97238e-07	0.338574	0.977	0.946	0.0108776
Bgn	8.44861e-07	-0.815422	0.062	0.265	0.0131807
Map1lc3a	8.48275e-07	-0.715821	0.148	0.368	0.0132339
Anxa5	8.67294e-07	-0.518057	0.281	0.528	0.0135307
Ndufb9	1.12596e-06	-0.689162	0.133	0.355	0.0175662
Rab1a	1.15674e-06	-0.690475	0.086	0.293	0.0180463
Myl9	1.38044e-06	-0.882531	0.148	0.363	0.0215363
Ccl6	1.64435e-06	0.531631	0.391	0.231	0.0256535
Mcl1	1.6773e-06	0.764618	0.32	0.173	0.0261675
Tagln2	1.90715e-06	0.660646	0.461	0.324	0.0297535
Tspo	1.98857e-06	0.723748	0.422	0.287	0.0310237
Mylk	2.16223e-06	-0.933602	0.094	0.292	0.0337329
Klf4	2.42579e-06	-0.697346	0.164	0.38	0.0378448
Dynll1	3.34953e-06	-0.479662	0.203	0.443	0.0522561
Cnpy2	3.49291e-06	-0.712541	0.094	0.288	0.0544929
Pebp1	3.61311e-06	-0.665476	0.07	0.259	0.0563681
Rps9	3.66998e-06	0.368184	0.953	0.917	0.0572553
Nr4a1	3.71042e-06	0.862037	0.406	0.277	0.0578862
Minos1	3.8997e-06	-0.491753	0.266	0.504	0.0608392
Swi5	4.01572e-06	-0.495149	0.266	0.492	0.0626493
Tcf4	4.64491e-06	-0.751762	0.07	0.255	0.0724653
Ly6e	5.43305e-06	0.390582	0.602	0.446	0.084761
mt-Nd5	6.13586e-06	-0.529631	0.305	0.534	0.0957255
Ifi27	6.52886e-06	-0.641628	0.078	0.26	0.101857
Chchd10	6.6559e-06	-1.17611	0.109	0.283	0.103839
Mfge8	8.05289e-06	-0.670872	0.07	0.251	0.125633
Lamp2	8.73213e-06	-0.523947	0.133	0.334	0.13623
Ddit4l	9.30269e-06	-0.788581	0.102	0.282	0.145131
Ctla2a	9.62276e-06	-1.09411	0.312	0.486	0.150125
Ccl7	1.05468e-05	-1.07742	0.195	0.378	0.16454
Mgp	1.06443e-05	-1.62408	0.336	0.494	0.166061
Gng12	1.18715e-05	-0.595978	0.203	0.41	0.185208
Ctsh	1.28619e-05	0.515756	0.43	0.292	0.200658
Bst2	1.30521e-05	-0.558998	0.203	0.406	0.203626
Ccl2	1.33335e-05	-1.26266	0.109	0.276	0.208016
Cyb5a	1.79543e-05	-0.463791	0.18	0.403	0.280105
H3f3b	1.83531e-05	0.288132	0.875	0.827	0.286326
Eef1g	1.87149e-05	-0.486855	0.305	0.512	0.291972
Tmem59	2.02595e-05	-0.506289	0.102	0.284	0.316069
Rps16	2.0585e-05	0.333084	0.836	0.754	0.321147
Anxa1	2.06349e-05	-0.677471	0.164	0.354	0.321926
Adh1	2.13653e-05	-0.844043	0.281	0.464	0.333321
Ifi27l2a	2.73264e-05	0.69659	0.461	0.338	0.42632
Hsp90b1	3.33381e-05	-0.447666	0.227	0.448	0.520108
Ppib	3.55563e-05	-0.552352	0.266	0.45	0.554713
Ssr2	3.80117e-05	-0.491092	0.148	0.338	0.59302
Calm2	3.88849e-05	-0.381133	0.266	0.483	0.606644
Rnaset2a	3.90742e-05	0.582669	0.289	0.168	0.609596
Prkar1a	3.96742e-05	-0.493169	0.125	0.312	0.618957
Hspb1	4.46556e-05	-1.18351	0.141	0.309	0.696672
Bsg	4.48422e-05	-0.482042	0.234	0.432	0.699583
Hsbp1	4.53214e-05	-0.529566	0.109	0.287	0.707059
Sec62	5.1971e-05	-0.450035	0.227	0.443	0.8108
Fkbp1a	5.3535e-05	-0.489721	0.227	0.424	0.8352
Ctsb	5.48508e-05	-0.384462	0.531	0.695	0.855727
Sec11a	5.54958e-05	-0.557844	0.102	0.269	0.86579
Fosb	5.90626e-05	-0.594209	0.281	0.455	0.921436
Apoe	6.16654e-05	-1.2298	0.477	0.653	0.962041
Btg1	6.63717e-05	0.599582	0.406	0.296	1
Cxcl10	6.73037e-05	-0.712887	0.102	0.257	1
Hmgn1	7.95584e-05	-0.548233	0.148	0.32	1
Dbi	8.05051e-05	-0.545298	0.219	0.396	1
Cox6a1	8.32618e-05	-0.340949	0.398	0.607	1
Ndufb11	8.89849e-05	-0.503178	0.094	0.256	1
Rps27	8.90663e-05	0.261627	0.992	0.968	1
Tpm2	9.26439e-05	-0.595241	0.133	0.306	1
Cox7c	9.55543e-05	-0.408176	0.367	0.578	1
Tmem256	0.000107904	-0.528238	0.094	0.251	1
Ywhaq	0.00012245	-0.464099	0.117	0.285	1
Myl12a	0.000122941	-0.376681	0.367	0.579	1
Eif4g2	0.000150902	-0.428665	0.195	0.384	1
Myl6	0.000154125	-0.392245	0.5	0.645	1
Rps13	0.000159441	0.301134	0.734	0.677	1
Romo1	0.000160418	-0.490102	0.117	0.279	1
Npc2	0.000165546	0.431054	0.578	0.498	1
Ilk	0.00017675	-0.525259	0.102	0.256	1
Vasp	0.000192822	0.630361	0.258	0.153	1
Aldoa	0.00020843	-0.342201	0.172	0.361	1
mt-Nd3	0.000210735	-0.435256	0.156	0.326	1
Lamp1	0.000211776	-0.371488	0.195	0.382	1
Cd47	0.000212414	0.694056	0.328	0.224	1
Ndufc1	0.000224726	-0.479439	0.109	0.264	1
Emp1	0.000244727	-0.611425	0.164	0.324	1
Ramp3	0.000259496	-0.560466	0.188	0.346	1
Tmed9	0.000262247	-0.409903	0.148	0.317	1
Scpep1	0.000308563	-0.408549	0.109	0.262	1
Csrp1	0.000316888	-0.475463	0.109	0.259	1
Gng5	0.000318757	-0.353546	0.25	0.439	1
Pnrc1	0.000344636	-0.357324	0.203	0.383	1
Capns1	0.000379578	-0.373175	0.219	0.403	1
Serbp1	0.000388915	-0.366402	0.18	0.358	1
Psme2	0.000430092	0.640553	0.297	0.198	1
Gdi2	0.000436028	0.582104	0.375	0.277	1
Atp5k	0.000436346	-0.387614	0.211	0.381	1
Clk1	0.000461458	-0.414071	0.133	0.287	1
Nupr1	0.000470366	-0.506548	0.164	0.317	1
Selenos	0.00051909	-0.381186	0.109	0.256	1
Cd9	0.000715324	-0.460199	0.172	0.331	1
Arf4	0.000799499	-0.340416	0.234	0.405	1
Ssr3	0.000820409	-0.35798	0.125	0.271	1
Zfas1	0.000827407	-0.504304	0.141	0.283	1
Nme1	0.000829131	-0.386408	0.133	0.278	1
Rpl10a-ps1	0.000837975	-0.325233	0.195	0.364	1
Pdia6	0.000936579	-0.277766	0.242	0.415	1
Ier2	0.000939534	-0.266727	0.289	0.48	1
Tmem50a	0.00102632	-0.348651	0.18	0.339	1
Clic1	0.00110594	0.410433	0.508	0.425	1
Ndufa11	0.00110872	-0.377435	0.172	0.321	1
Manf	0.00112441	-0.472888	0.148	0.285	1
Hnrnpk	0.00114922	-0.294052	0.258	0.423	1
Skp1a	0.00134807	-0.401845	0.141	0.274	1
Sar1a	0.00136987	-0.367748	0.125	0.264	1
Eef1a1	0.00153131	-0.309217	0.68	0.741	1
Tmed2	0.00155349	-0.324414	0.133	0.274	1
Cox7a2	0.00159452	-0.336265	0.273	0.434	1
Aprt	0.00163796	-0.431847	0.125	0.256	1
Morf4l2	0.00169629	-0.352767	0.141	0.279	1
Capzb	0.00178794	0.408221	0.461	0.387	1
Rps17	0.00182463	-0.272326	0.508	0.693	1
Gm8730	0.00184968	-0.313456	0.148	0.295	1
Selenok	0.00189416	-0.317506	0.234	0.4	1
Cstb	0.00205281	-0.252633	0.242	0.396	1
Prdx2	0.00205926	-0.330071	0.195	0.347	1
Ndufa7	0.00206151	-0.351503	0.219	0.368	1
Gm11361	0.00206453	-0.25935	0.352	0.522	1
Vapa	0.00206809	-0.313474	0.133	0.267	1
Psmd8	0.00207597	-0.327855	0.133	0.267	1
Uqcrh	0.002194	-0.303135	0.344	0.513	1
Selenow	0.00228223	-0.295094	0.367	0.521	1
Ckb	0.00242107	0.549354	0.312	0.23	1
Dap	0.00246851	-0.346764	0.125	0.255	1
Flna	0.00251534	-0.415423	0.18	0.314	1
Tmem258	0.00252994	-0.318501	0.281	0.444	1
Ly6a	0.00254058	-0.450811	0.172	0.302	1
Tmem176a	0.00270364	0.523231	0.266	0.179	1
Msn	0.00283203	0.506824	0.273	0.19	1
Lmna	0.00286801	-0.317502	0.148	0.278	1
Rnh1	0.00322939	0.448383	0.352	0.263	1
Ndufa5	0.00330276	-0.297023	0.164	0.3	1
Tpm4	0.00336964	-0.344366	0.25	0.396	1
Cox6c	0.00340946	-0.348381	0.477	0.637	1
Ube2d3	0.00341955	0.4258	0.461	0.396	1
Ssr4	0.00379498	-0.277182	0.18	0.319	1
Gm9843	0.00427148	0.522109	0.406	0.352	1
Pfn1	0.00437667	0.300149	0.586	0.527	1
Malat1	0.00476769	-0.382192	0.266	0.396	1
Edf1	0.00508499	-0.307839	0.133	0.251	1
Rpl15	0.00515356	-0.266468	0.453	0.587	1
Eef1d	0.00520398	-0.348228	0.141	0.26	1
Elob	0.00664438	-0.267881	0.336	0.49	1
Hmgb1	0.00680275	-0.319533	0.141	0.257	1
Ndufa12	0.00757255	-0.334511	0.148	0.262	1
Rpsa	0.00759157	0.273058	0.742	0.703	1
Uqcr10	0.00761806	-0.276561	0.242	0.381	1
Slc38a2	0.00788174	-0.307695	0.18	0.301	1
Gadd45b	0.00795768	0.452247	0.32	0.238	1
Ifrd1	0.0081201	0.408342	0.492	0.43	1
Pcbp2	0.00814082	-0.28974	0.234	0.37	1
Marcksl1	0.00838413	0.527319	0.352	0.278	1
Actr3	0.00860759	0.426884	0.312	0.24	1
Atp5a1	0.00992373	-0.273956	0.258	0.392	1
Tpm3	0.0101118	0.414105	0.305	0.228	1
Eif4a1	0.0107684	0.381867	0.477	0.436	1
Zfp36l1	0.013629	-0.250826	0.258	0.379	1
Cnbp	0.0138134	0.357154	0.461	0.428	1
Gm8797	0.0142297	-0.255818	0.32	0.438	1
Id2	0.0146269	0.43877	0.312	0.239	1
Capza2	0.0149434	0.47468	0.266	0.2	1
Atp5b	0.0152362	-0.270397	0.305	0.423	1
Gm15536	0.0155295	0.341179	0.484	0.432	1
Cops9	0.0158129	-0.264162	0.242	0.366	1
Psma3	0.0164261	-0.295457	0.156	0.257	1
Pdia3	0.0170485	-0.283314	0.297	0.413	1
Rps19-ps6	0.0181221	-0.287014	0.211	0.322	1
Rps25	0.0187685	0.252279	0.688	0.664	1
mt-Rnr2	0.019763	-0.356078	0.805	0.902	1
Ppp1r15a	0.0200645	-0.256843	0.203	0.319	1
Sdcbp	0.0241469	0.463596	0.375	0.321	1
Slc3a2	0.026036	0.399432	0.391	0.342	1
Rap1b	0.0288128	0.442661	0.273	0.22	1
Ndufa6	0.0344215	0.294851	0.383	0.332	1
Mrfap1	0.0346033	-0.258076	0.18	0.273	1
Ifitm2	0.0500922	0.308815	0.547	0.57	1
Cycs	0.0701027	0.517518	0.266	0.231	1
H3f3a	0.0713776	0.480138	0.367	0.345	1
Rpl36al	0.0726594	0.259467	0.438	0.418	1
Plac8	0.0968295	0.511842	0.328	0.309	1
Atp6v0e	0.101384	0.313207	0.344	0.314	1
Shisa5	0.118949	0.263269	0.281	0.24	1
Litaf	0.126203	0.29133	0.367	0.337	1
Hnrnpa2b1	0.146341	0.369854	0.336	0.312	1
Emp3	0.187708	0.331721	0.32	0.311	1
Atf3	0.187761	0.257149	0.344	0.318	1
Snx3	0.279969	0.261738	0.281	0.268	1
Mt1	0.292152	0.266233	0.406	0.403	1
Eif5	0.471071	0.271217	0.328	0.34	1
Igha	0.479069	-0.604431	0.336	0.406	1
Sqstm1	0.530351	0.255311	0.477	0.502	1
Igkc	0.589401	-0.614213	0.477	0.509	1

[truncated: 6 more sheets: 10 stromal2_Retnlg_high, 11 smooth muscle , 12 monocyte, 13 epithelia1, 14 endothelia_Mmrn1_high, 15 B cell ]
